1 **Modulation of dopamine D<sub>1</sub> receptors via histamine H<sub>3</sub> receptors is a novel**  
2 **therapeutic target for Huntington's disease**

3 David Moreno-Delgado<sup>1,3,†,a</sup>, Mar Puigdemívol<sup>2,3,4,7,†,b</sup>, Estefanía Moreno<sup>1,3</sup>, Mar  
4 Rodríguez-Ruiz<sup>1,3</sup>, Joaquín Botta<sup>7</sup>, Paola Gasperini<sup>7</sup>, Anna Chiarlone<sup>3,6</sup>, Lesley A.  
5 Howell<sup>8</sup>, Marco Scarselli<sup>9</sup>, Vicent Casadó<sup>1,3</sup>, Antoni Cortés<sup>1,3</sup>, Sergi Ferré<sup>5</sup>, Manuel  
6 Guzmán<sup>3,6</sup>, Carme Lluís<sup>1,3</sup>, Jordi Alberch<sup>2,3,4</sup>, Enric Canela<sup>1,3</sup>, Sílvia Ginés<sup>2,3,4,†,\*</sup>, Peter J.  
7 McCormick<sup>1,3, 7,10,†\*</sup>

8

9 <sup>1</sup> Department of Biochemistry and Molecular Biology, Faculty of Biology, University of  
10 Barcelona, Spain.

11 <sup>2</sup> Department of Biomedical Science, Faculty of Medicine, University of Barcelona,  
12 Institut of Neuroscience, Spain.

13 <sup>3</sup> Centro de Investigación Biomédica en Red sobre Enfermedades Neurodegenerativas.

14 <sup>4</sup> Institut d'Investigacions Biomèdiques August Pi i Sunyer (IDIBAPS).

15 <sup>5</sup> National Institute on Drug Abuse, Intramural Research Program, National Institutes of  
16 Health, Department of Health and Human Services, Baltimore, MD 21224 Maryland,  
17 USA.

18 <sup>6</sup> Department of Biochemistry and Molecular Biology I, School of Biology, Instituto  
19 Universitario de Investigación Neuroquímica, and Instituto Ramón y Cajal de  
20 Investigación Sanitaria, Complutense University of Madrid, Spain.

21 <sup>7</sup> School of Pharmacy, University of East Anglia, Norwich Research Park, Norwich,  
22 NR4 7TJ.

23 <sup>8</sup> School of Biological and Chemical Sciences, Queen Mary University of London, Mile  
24 End Road, London EC1M 4NS.

25 <sup>9</sup> Department of Translational Research and New Technologies in Medicine and  
26 Surgery, University of Pisa, Pisa, Italy.

27 <sup>10</sup> William Harvey Research Institute, Barts and the London School of Medicine, Queen  
28 Mary University of London, London EC1M 6BQ, United Kingdom.

29 † These authors contributed equally to this work.

30

31 \*Correspondence to: Peter J. McCormick: [p.mccormick@qmul.ac.uk](mailto:p.mccormick@qmul.ac.uk) and Sílvia Ginés:  
32 [silviagines@ub.edu](mailto:silviagines@ub.edu)

33 <sup>a</sup> Present Address: UCB BioPharma SPRL, Chemin de Foriest, Braine-l'Alleud,  
34 Belgium

35 <sup>b</sup> Present Address: Department of Biochemistry, University of Cambridge, Cambridge  
36 CB2 1QW, United Kingdom

37

38

39

40 **Abstract**

41 Early Huntington's disease (HD) include over-activation of dopamine D<sub>1</sub> receptors  
42 (D<sub>1</sub>R), producing an imbalance in dopaminergic neurotransmission and cell death. To  
43 reduce D<sub>1</sub>R over-activation, we present a strategy based on targeting complexes of D<sub>1</sub>R  
44 and histamine H<sub>3</sub> receptors (H<sub>3</sub>R). Using an HD striatal cell model and HD organotypic  
45 brain slices we found that D<sub>1</sub>R-induced cell death signaling and neuronal degeneration ,  
46 are mitigated by an H<sub>3</sub>R antagonist. We demonstrate that the D<sub>1</sub>R-H<sub>3</sub>R heteromer is  
47 expressed in HD animal models at early but not late stages of HD, correlating with HD  
48 progression. In accordance, we found this target expressed in human control subjects  
49 and low-grade HD patients. Finally, treatment of HD mice with an H<sub>3</sub>R antagonist  
50 prevented cognitive and motor learning deficits, as well as the loss of heteromer  
51 expression. Taken together, our results indicate that D<sub>1</sub>R - H<sub>3</sub>R heteromers play a  
52 pivotal role in dopamine signaling and represent novel targets for treating HD.

53

54 **Impact Statement:** Progression of Huntington's disease can be slowed by altering  
55 dopamine signalling through the Dopamine 1 receptor - Histamine 3 receptor heteromer.

56

57 **Introduction**

58 Huntington's disease (HD) is a dominant inherited progressive neurodegenerative  
59 disorder caused by expansion of a CAG repeat, coding a polyglutamine repeat within  
60 the *N*-terminal region of huntingtin protein (HDCRG, 1993; Vonsattel and DiFiglia,  
61 1998). Although dysfunction and death of striatal medium-sized spiny neurons  
62 (MSSNs) is a key neuropathological hallmark of HD(Ferrante et al., 1991; Vonsattel et  
63 al., 1985), cognitive deficits appear long before the onset of motor disturbances

64 (Lawrence et al., 2000; Lemièrè et al., 2004). It has been postulated that alterations in  
65 the dopaminergic system may contribute to HD neuropathology (Chen et al., 2013;  
66 Jakel and Maragos, 2000), as dopamine (DA) plays a key role in the control of  
67 coordinated movements. Increased DA levels and DA signaling occur at early stages of  
68 the disease (Chen et al., 2013; Garret et al., 1992; Jakel and Maragos, 2000), resulting in  
69 an imbalance in striatal neurotransmission initiating signaling cascades that may  
70 contribute to striatal cell death (Paoletti et al., 2008; Ross and Tabrizi, 2011). Several  
71 studies demonstrated that DA receptor antagonists and agents that decrease DA content  
72 reduce chorea and motor symptoms while dopaminergic stimulation exacerbate such  
73 symptoms (Huntington Study Group, 2006; Mestre et al., 2009; Tang et al., 2007).

74         Within the striatum, two different MSSNs populations can be distinguished: 1)  
75 MSSNs expressing enkephalin and dopamine D<sub>2</sub> receptors (D<sub>2</sub>R), which give rise to the  
76 indirect striatal efferent pathway, and 2) MSSNs expressing substance P and dopamine  
77 D<sub>1</sub> receptors (D<sub>1</sub>R), comprising the direct striatal efferent pathway. Recently, several  
78 studies with experimental models have changed the traditional view that D<sub>2</sub>R-MSSNs  
79 are more vulnerable in HD (Cepeda et al., 2008; Kreitzer and Malenka, 2007), proposing  
80 a new view in which D<sub>1</sub>R-MSSNs are more vulnerable to the HD mutation. In this view,  
81 it has been demonstrated that mutant huntingtin enhances striatal cell death through the  
82 activation of D<sub>1</sub>R but not D<sub>2</sub>R (Paoletti et al., 2008). More recently, it has been  
83 described that, at early stages of the disease, HD mice show an increase in glutamate  
84 release onto D<sub>1</sub>R neurons but not D<sub>2</sub>R neurons while, later in the disease, glutamate  
85 release is selectively decreased to D<sub>1</sub>R cells (Andre et al., 2011), indicating that several  
86 changes occur in D<sub>1</sub>R neurons at both early and late disease stages. Strategies that might  
87 reduce D<sub>1</sub>R signaling could prove successful towards preventing HD (10;14;17;18).  
88 However, D<sub>1</sub>Rs are highly expressed in many tissues (19) and broad use of D<sub>1</sub>R

89 antagonists as a preventive treatment has important drawbacks including locomotor  
90 impairments (20), or induce depression, parkinsonism and sedation in HD patients  
91 (12;21).

92 Histamine is an important neuromodulator with four known G protein-coupled receptors  
93 (GPCRs). H<sub>3</sub>Rs are expressed in brain regions involved in both motor function  
94 (striatum) and cognition, such as the cortex, thalamus, hypothalamus, hippocampus and  
95 amygdala (22). It is known that in at least striatal GABAergic dynorphinergic neurons  
96 (23-25), both D<sub>1</sub>R and H<sub>3</sub>R are co-expressed and we and others have found that they  
97 establish functional negative interactions by forming molecular complexes termed  
98 heteromers (26;27). Hence, in this work, we hypothesized that targeting D<sub>1</sub>R through  
99 these receptor complexes of D<sub>1</sub>R and H<sub>3</sub>R might serve as a more efficient and targeted  
100 strategy to slow the progression of HD. Specifically, we demonstrate that D<sub>1</sub>R-H<sub>3</sub>R  
101 heteromers are expressed and functional in early HD stages but are lost in late stages.  
102 An H<sub>3</sub>R antagonist acting through D<sub>1</sub>R-H<sub>3</sub>R heteromers acts as a protective agent  
103 against dopaminergic imbalance in early HD stages improving learning and long-term  
104 memory deficits and rescuing the lost of D<sub>1</sub>R-H<sub>3</sub>R complexes at late stages of HD.

105

106 **Results**

107 **Functional D<sub>1</sub>R-H<sub>3</sub>R heteromers are expressed in wild type STHdh<sup>Q7</sup> and HD**  
108 **STHdh<sup>Q111</sup>STHdhstriatal cell model**

109 To test whether D<sub>1</sub>R-H<sub>3</sub>R heteromers could indeed be targets for controlling D<sub>1</sub>R  
110 signaling in HD, we first analyzed the expression of both receptors in immortalized  
111 striatal cells expressing endogenous levels of full-length wild-type STHdh<sup>Q7</sup> or mutant  
112 STHdh<sup>Q111</sup> huntingtin (28). Ligand binding determined that both STHdh<sup>Q7</sup> and  
113 STHdh<sup>Q111</sup> cells endogenously express similar levels of D<sub>1</sub>R and H<sub>3</sub>R (Supplemental  
114 Table 1). By proximity ligation assays (PLA), D<sub>1</sub>R-H<sub>3</sub>R heteromers were detected as  
115 red spots surrounding the blue stained nuclei in both cell types (**Fig. 1A, left panels of**  
116 **both cell types**) and in cells treated with control lentivirus vector (**Fig. S1A**) but not in  
117 cells depleted of H<sub>3</sub>R (**Fig. 1A, right panels of both cell types**) by shRNA, as shown  
118 by RT-PCR and functionality (**Fig. S1 B, C**), or in negative controls (**Fig. S1D**). To  
119 ensure that D<sub>1</sub>R-H<sub>3</sub>R heteromers were functional in STHdh cells, cell signaling  
120 experiments were performed. Using both STHdh<sup>Q7</sup> and STHdh<sup>Q111</sup> cells and  
121 concentrations of ligands previously shown to be optimal for receptor activation of the  
122 ERK1/2 pathway (26;29;30), we observed that the D<sub>1</sub>R agonist SKF 81297 was able to  
123 increase ERK1/2 phosphorylation whereas it was prevented by D<sub>1</sub>R antagonist SCH  
124 23390, and by the H<sub>3</sub>R antagonist thioperamide (**Fig. S2A, B**) via cross-antagonism. In  
125 addition, we tested a previously described alternative signaling pathway activated  
126 downstream of D<sub>1</sub>R, Ca<sup>2+</sup> mobilization (31;32). When cells were treated with the D<sub>1</sub>R  
127 agonist SKF 81297 a robust and rapid increase in cytosolic Ca<sup>2+</sup> was detected in both  
128 STHdh<sup>Q7</sup> and STHdh<sup>Q111</sup> cells (**Fig. 1B, C**). Importantly, this calcium release could be  
129 dampened with the H<sub>3</sub>R antagonist thioperamide (cross-antagonism) (**Fig. 1B, C**). The  
130 above signaling data strongly support the presence of functional D<sub>1</sub>R-H<sub>3</sub>R heteromers in

131 STHdh cells.

132 To further demonstrate that an H<sub>3</sub>R antagonist is dampening D<sub>1</sub>R activation  
133 involving D<sub>1</sub>R-H<sub>3</sub>R heteromers, we evaluated the effect of interfering peptides, which  
134 are synthetic peptides with the amino acid sequence of domains of the receptors  
135 involved in the heteromeric interface. This approach has been used by us and others to  
136 disrupt other heteromer complexes (33-37). In a previous study we showed the efficacy  
137 of this approach in demonstrating heteromerization of D<sub>1</sub>R with D<sub>3</sub>R, using a peptide  
138 with the sequence of D<sub>1</sub>R transmembrane domain 5 (TM5) but not TM7 (34). We  
139 therefore investigated whether synthetic peptides with the sequence of TM5, and TM7  
140 (as a negative control) of D<sub>1</sub>R, fused to HIV-TAT, were also able to disrupt receptor  
141 D<sub>1</sub>R-H<sub>3</sub>R heteromers measured by PLA. In agreement with our hypothesis, there was a  
142 near complete loss in PLA fluorescence signal when STHdh<sup>Q7</sup> and STHdh<sup>Q111</sup> cells  
143 were incubated with TAT-TM 5 peptide (**Fig. 1D, F**), but not for the negative control in  
144 which the TAT-TM 7 peptide was used (**Fig. 1H, J**). We next evaluated whether TM5  
145 or TM7 would interfere with the observed cross-antagonism in calcium mobilization  
146 assays. Clearly, pretreatment of both STHdh<sup>Q7</sup> and STHdh<sup>Q111</sup> cells with the TAT-TM5  
147 (**Fig. 1E, G**) but not TAT-TM7 (**Fig. 1I, K**) peptide disrupts the ability of the H<sub>3</sub>R  
148 antagonist thioperamide to dampen D<sub>1</sub>R calcium signaling. These results support that  
149 TM5 forms part of the interface of the D<sub>1</sub>R-H<sub>3</sub>R heteromer and demonstrate that the  
150 H<sub>3</sub>R antagonist effect is driven through direct interaction between D<sub>1</sub>R and H<sub>3</sub>R.

151

### 152 **H<sub>3</sub>R ligands prevent the D<sub>1</sub>R-induced cell death in STHdh<sup>Q7</sup> and STHd<sup>Q111</sup> cells**

153 It has been previously reported that upon activation of D<sub>1</sub>R, STHdh cell viability is  
154 reduced (10). To explore whether H<sub>3</sub>R ligands could impair D<sub>1</sub>R activation through  
155 D<sub>1</sub>R-H<sub>3</sub>R heteromers in a pathologically relevant readout, we used D<sub>1</sub>R-induced cell

156 death as an output of D<sub>1</sub>R activation in STHdh cells. As expected, STHdh cell viability  
157 decreased when treated with the D<sub>1</sub>R agonist SKF 81297 in a concentration-dependent  
158 manner (**Fig. S2C**). Significant cell death did not occur until 30  $\mu$ M SKF 81297 was  
159 used (**Fig.S2C**), an effect prevented by the D<sub>1</sub>R antagonist SCH 23390 (**Fig. S2E**). Pre-  
160 treatment with the H<sub>3</sub>R antagonist thioperamide, which did not modify cell viability  
161 when administered alone (**Fig. S2E**), increased the number of surviving cells in the  
162 presence of the D<sub>1</sub>R agonist SKF 81297 in both cell types (**Fig. 1L, M and Fig. S2D**).  
163 Importantly, the effect of the H<sub>3</sub>R antagonist thioperamide was specific since no  
164 protection from D<sub>1</sub>R agonist-induced cell death was observed in cells depleted of H<sub>3</sub>R  
165 with shRNA lentiviral infection (**Fig. 1L, M**), but was observed in cells transfected with  
166 the control lentivirus (**Fig. S2F**). In addition, we also demonstrated that recovery of  
167 viability induced by the H<sub>3</sub>R antagonist thioperamide was mediated by D<sub>1</sub>R-H<sub>3</sub>R  
168 heteromers since pre-incubation with D<sub>1</sub>R TM5 peptide, but not D<sub>1</sub>R TM7 impaired the  
169 H<sub>3</sub>R antagonist protection from D<sub>1</sub>R agonist-induced cell death (**Fig. 1L, M**).

170 To better understand the mechanisms involved in D<sub>1</sub>R-H<sub>3</sub>R heteromer action, we  
171 determined which cellular signaling pathways are implicated in the cross-antagonism of  
172 H<sub>3</sub>R upon activation of D<sub>1</sub>R. Both concentrations of the D<sub>1</sub>R agonist SKF 81297,  
173 cytotoxic (30  $\mu$ M) and non-cytotoxic (1  $\mu$ M), can induce intracellular calcium release,  
174 which is more pronounced and persistent at 30  $\mu$ M (**Fig. S4A and B**). As occurred at 1  
175  $\mu$ M SKF 81297 (**see Fig. 1**), the calcium release induced by 30  $\mu$ M SKF 81297 was also  
176 blocked by the H<sub>3</sub>R antagonist thioperamide (**Fig. S3A and B**). A correlation between  
177 the intensity of calcium responses and the activation of apoptotic pathways such as p38  
178 (38) has been previously demonstrated. Thus, we measured changes in p38  
179 phosphorylation levels using both concentrations of the D<sub>1</sub>R agonist SKF 81297 (**Fig.**  
180 **S4C and D**). Interestingly, we found that increased phosphorylation of p38 only

181 occurred at the cytotoxic concentration of SKF 81297. Treatment with the H<sub>3</sub>R  
182 antagonist thioperamide reduced p38 phosphorylation upon D<sub>1</sub>R activation in both cell  
183 types (**Fig. S3C**). Moreover, the p38 inhibitor SB 203580 blocked p38 phosphorylation  
184 (**Fig. S3C**) and protected against the cytotoxic effect of the D<sub>1</sub>R agonist SKF 81297 in a  
185 dose-dependent manner (**Fig. S3D**), confirming that p38 is a key pathway involved in  
186 D<sub>1</sub>R-mediated cell death in these cells.

187 Overstimulation of D<sub>1</sub>R induces receptor internalization promoting rapid  
188 intracellular signaling (39), while D<sub>1</sub>R expression is decreased in several models of HD  
189 (40). Receptor internalization can activate secondary signaling pathways (41). To test  
190 whether changes in receptor trafficking might be at play we analyzed whether 30  $\mu$ M  
191 SKF 81297 can induce D<sub>1</sub>R internalization in the striatal cells. We observed that 30  $\mu$ M  
192 SKF 81297, that decreased cell viability, promoted D<sub>1</sub>R internalization in both STHdh  
193 cells (**Fig. S5A**). Interestingly, the 30  $\mu$ M SKF 81297-induced D<sub>1</sub>R internalization  
194 correlated with D<sub>1</sub>R-H<sub>3</sub>R heteromer disruption evidenced by a lack of PLA staining in  
195 both STHdh cells treated with 30  $\mu$ M SKF 81297 (**Fig. S5B**). One potential way by  
196 which GPCRs can influence each other in a heteromer is by altering the trafficking of  
197 the partner receptor (42). Pre-treatment with the H<sub>3</sub>R antagonist thioperamide restored  
198 the number of punctate PLA spots decreased after overstimulation with the D<sub>1</sub>R agonist  
199 SKF 81297 (**Fig. S5B**). These results suggest that H<sub>3</sub>R ligands are impede D<sub>1</sub>R  
200 internalization and D<sub>1</sub>R-mediated cell death by inhibiting p38 phosphorylation and  
201 calcium signaling.

202

203 **Functional D<sub>1</sub>R-H<sub>3</sub>R heteromers are expressed in wild-type Hdh<sup>Q7/Q7</sup> and in**  
204 **Hdh<sup>Q7/Q111</sup> mutant knock-in mice at early but not late HD stages**



205 To test whether D<sub>1</sub>R-H<sub>3</sub>R heteromers can indeed be targets for treating HD, we  
206 investigated their expression and function in the striatum, cerebral cortex and  
207 hippocampus of a widely accepted preclinical model of HD, the heterozygous  
208 Hdh<sup>Q7/Q111</sup> mutant knock-in mice, and their wild-type Hdh<sup>Q7/Q7</sup> littermates (43;44). By  
209 PLA we confirmed that both Hdh<sup>Q7/Q7</sup> and Hdh<sup>Q7/Q111</sup> mice display D<sub>1</sub>R-H<sub>3</sub>R heteromers  
210 at 2 months (mo) (**Fig. S6**) and 4 mo (**Fig. 2A**) of age in all brain regions tested. No  
211 signal was observed in negative controls in which one of the PLA primary antibodies  
212 were missing (**Fig. S7**). Heteromer expression was similar in all brain areas and no  
213 differences were observed between genotypes at 4 mo of age (**Fig. 2B**). Surprisingly, an  
214 almost complete loss of D<sub>1</sub>R-H<sub>3</sub>R heteromers was found in 6 mo and 8 mo-old  
215 Hdh<sup>Q7/Q111</sup> mice but not in Hdh<sup>Q7/Q7</sup> mice (**Fig. S8 and Fig. 3A and B**), indicating that  
216 at more advanced disease stages the D<sub>1</sub>R-H<sub>3</sub>R heteromer is lost. Although at 8 mo of  
217 age we detected a partial decrease in striatal D<sub>1</sub>R expression in Hdh<sup>Q7/Q111</sup> compared  
218 with Hdh<sup>Q7/Q7</sup> mice using ligand binding experiments (**Supplemental Table 2**), the loss  
219 of heteromer expression is not due to a complete loss of receptor expression since by  
220 radioligand binding (**Supplemental Table 2**) and mRNA expression analysis  
221 (**Supplemental Table 3**) both receptors continue to be expressed.

222 To test the role of D<sub>1</sub>R-H<sub>3</sub>R heteromers, organotypic mouse striatal, cortical and  
223 hippocampal cultures were obtained. Cell death was induced by the D<sub>1</sub>R agonist SKF  
224 81297 (50 μM), and analysis of DAPI and propidium iodide staining was performed. As  
225 expected, D<sub>1</sub>R agonist SKF 81297 treatment increased the percentage of cell death in all  
226 three regions compared to vehicle-treated organotypic cultures without significant  
227 differences between genotypes at 4 mo of age (**Fig. 2C**). Importantly, slices pre-treated  
228 with the H<sub>3</sub>R antagonist thioperamide, that does not modify cell death when  
229 administered alone, protected cells from D<sub>1</sub>R elicited cell death (**Fig. 2C**), indicating

230 that functional D<sub>1</sub>R-H<sub>3</sub>R heteromers are expressed in different brain areas of Hdh<sup>Q7/Q7</sup>  
231 and Hdh<sup>Q7/Q111</sup> mice at early disease stages. The dramatic change in heteromer  
232 expression in 8 mo-old Hdh<sup>Q7/Q111</sup> mice was mirrored by the lack of protection of the  
233 H<sub>3</sub>R antagonist thioperamide against SKF 81297-induced cell death in organotypic  
234 cultures (**Fig. 3C**), corroborating that the presence of D<sub>1</sub>R-H<sub>3</sub>R heteromers is needed for  
235 the H<sub>3</sub>R antagonist to prevent D<sub>1</sub>R-mediated cell death.

236

### 237 **Treatment with thioperamide prevents cognitive and motor learning deficits at** 238 **early disease stages**

239 To test whether the H<sub>3</sub>R antagonist thioperamide can exert beneficial effects in the  
240 initial stages of the disease we evaluated the effect of chronic thioperamide treatment on  
241 motor learning and memory deficits in mutant Hdh<sup>Q7/Q111</sup> mice. Since cognitive decline  
242 is observed in these HD mice from 6 mo of age (43-45) and the D<sub>1</sub>R-H<sub>3</sub>R heteromers  
243 are expressed and functional until the age of 5 mo (**Fig. S9A-D**), we chose 5 mo-old  
244 animals to start the thioperamide treatment (**Fig. S10**). Corticostriatal function in saline  
245 and thioperamide-treated Hdh<sup>Q7/Q7</sup> and Hdh<sup>Q7/Q111</sup> mice was analyzed by using the  
246 accelerating rotarod task that evaluates the acquisition of new motor skills (44). Saline-  
247 treated mutant Hdh<sup>Q7/Q111</sup> mice were unable to maintain their balance on the rotarod as  
248 wild-type Hdh<sup>Q7/Q7</sup> mice revealing impaired acquisition of new motor skills (**Fig. 4A**).  
249 Chronic treatment with thioperamide completely rescued motor learning deficits in  
250 mutant Hdh<sup>Q7/Q111</sup> mice as evidenced by a similar latency to fall in the accelerating  
251 rotarod as wild type Hdh<sup>Q7/Q7</sup> mice. Next, recognition long-term memory (LTM) was  
252 analyzed by using the novel object recognition test (NORT) (**Fig. 4B**). After two days  
253 of habituation in the open field arena (**Fig. S11A, B, C, D and Fig. S10E, F, G, H**), no  
254 significant differences were found between genotypes and/or treatments, demonstrating

255 no alterations in motivation, anxiety or spontaneous locomotor activity. After  
256 habituation, animals were subjected to a training session in the open field arena in the  
257 presence of two similar objects (A and A'). Both saline and thioperamide-treated wild-  
258 type Hdh<sup>Q7/Q7</sup> and mutant Hdh<sup>Q7/Q111</sup> mice similarly explored both objects indicating  
259 neither object nor place preferences (**Fig. 4B**). After 24 h, LTM was evaluated by  
260 changing one of the old objects (A') for a novel one (B). Whereas saline-treated  
261 Hdh<sup>Q7/Q111</sup> mice did not show any preference for the novel object with respect to the  
262 familiar one, indicating recognition LTM deficits, thioperamide treatment completely  
263 prevented this LTM deficit in mutant Hdh<sup>Q7/Q111</sup> mice (**Fig. 4B**). Next, spatial LTM was  
264 analyzed using the T-maze spontaneous alternation task (T-SAT) (**Fig. 4C**). During the  
265 training, similar exploration time (**Fig. 4C, left panel**) and similar number of arm  
266 entries (**Fig. S12, left panel**) were found in all genotypes and treatments. After 5 h, a  
267 testing session showed that saline-treated Hdh<sup>Q7/Q111</sup> mice had no preferences between  
268 the novel arm and the old arm, indicating spatial LTM deficits (**Fig. 4C, right panel**).  
269 Interestingly, mutant Hdh<sup>Q7/Q111</sup> mice treated with thioperamide spent more time in the  
270 novel *versus* the old arm, revealing preserved LTM (**Fig. 4C, right panel**). Overall,  
271 these data demonstrate the effectiveness of thioperamide treatment in restoring motor  
272 learning and preventing spatial and recognition LTM deficits in mutant Hdh<sup>Q7/Q111</sup> mice.

273 We next tested if the reversion of the HD phenotype in mutant Hdh<sup>Q7/Q111</sup> mice  
274 induced by thioperamide treatment correlated with the preservation of D<sub>1</sub>R-H<sub>3</sub>R  
275 heteromer expression. By PLA we observed that in saline-treated 6-mo-old Hdh<sup>Q7/Q111</sup>  
276 mice the heteromer expression was significantly diminished with respect to the age-  
277 matched Hdh<sup>Q7/Q7</sup> mice (**Fig. S8A and B**). Notably, treatment with thioperamide  
278 significantly prevented the loss of D<sub>1</sub>R-H<sub>3</sub>R heteromers in all brain regions analyzed in  
279 Hdh<sup>Q7/Q111</sup> mice at both 6 (**Fig. 4D and E**) and 8 mo of age (**Fig. S13A and B**),

280 suggesting that the altered trafficking observed in cells may potentially also occur in  
281 vivo.

282

283 **Treatment with thioperamide ameliorates spinophilin-immunoreactive puncta**  
284 **alterations in the motor cortex and hippocampus of 6-month-old mutant**  
285 **Hdh<sup>Q7/Q111</sup> mice**

286 Alterations in dendritic spine dynamics, density and morphology are critically involved  
287 in the synaptic deficits present in HD (4;44-51). We recently described a significant  
288 decrease in dendritic spine density in the hippocampus (45) and the motor cortex of  
289 mutant Hdh<sup>Q7/Q111</sup> mice (44) without significant alterations in the striatum. To analyze  
290 whether the improvement of motor learning and memory deficits observed in  
291 thioperamide-treated mutant Hdh<sup>Q7/Q111</sup> mice was associated with a recovery in the  
292 density of dendritic spines, spinophilin immunostaining was performed in CA1  
293 hippocampal and motor cortical coronal slices obtained from 6-mo-old wild-type  
294 Hdh<sup>Q7/Q7</sup> and mutant Hdh<sup>Q7/Q111</sup> mice (**Fig. 5A and B and Fig. S14A**). This  
295 methodology was used by us and others to identify structural alterations in dendritic  
296 spines (44;52;53). Confocal microscopy analyses revealed a significant reduction in the  
297 density of spinophilin-immunoreactive puncta in the *stratum radiatum* (apical dendrites  
298 of CA1 pyramidal neurons) and *stratum oriens* (basal dendrites of CA1 pyramidal  
299 neurons) of saline-treated 6-mo-old mutant Hdh<sup>Q7/Q111</sup> mice compared to saline-treated  
300 wild-type Hdh<sup>Q7/Q7</sup> mice (**Fig. 5A and Fig. S14A**). Interestingly, thioperamide  
301 treatment prevented the decline in the number of spinophilin-immunoreactive puncta in  
302 mutant Hdh<sup>Q7/Q111</sup> mice. Similar data was obtained when the layers of the motor  
303 cerebral cortex (M1) were analyzed. A significant reduction in the density of  
304 spinophilin-immunoreactive puncta in layer I and layer II-III, but not layer V, of the

305 motor cortex of 6-mo-old saline-treated Hdh<sup>Q7/Q111</sup> mice was found compared to saline-  
306 treated Hdh<sup>Q7/Q7</sup> mice (**Fig. 5B and Fig. S14A**). Interestingly, thioperamide-treated  
307 Hdh<sup>Q7/Q111</sup> mice exhibited a complete recovery in the density of spinophilin-  
308 immunoreactive puncta (**Fig. 5A, 5B and Fig. S14A**). No significant differences were  
309 found between groups when the mean size of spinophilin puncta was analyzed (**Fig.**  
310 **S14A**). Altogether, these data demonstrate that the loss of spinophilin immunoreactive-  
311 puncta in mutant Hdh<sup>Q7/Q111</sup> mice can be ameliorated by thioperamide treatment.

312

313 We also evaluated mutant huntingtin (mhtt) aggregates in the striatum, cerebral cortex  
314 and hippocampus of mutant Hdh<sup>Q7/Q111</sup> mice after saline or thioperamide treatment, as  
315 another pathological hallmark of HD (43;54;55). 1C2 immunostaining revealed in  
316 lysates from either vehicle or treated mutant Hdh<sup>Q7/Q111</sup> mice a substantial accumulation  
317 of mhtt oligomeric forms detected as a diffuse smear in the stacking gel (**Fig. S14B**).  
318 Thioperamide treatment failed to prevent the accumulation of these oligomeric forms  
319 (**Fig. 5C and Fig. S14B**). No significant differences between groups were found when  
320 soluble monomeric mhtt levels were analyzed (**Fig. 5C and Fig. S14B**).

321

### 322 **Thioperamide treatment does not rescue memory and motor learning deficits in** 323 **mutant Hdh<sup>Q7/Q111</sup> mice when D<sub>1</sub>R-H<sub>3</sub>R heteromers are lost**

324 If the behavioral improvements observed after thioperamide treatment are mediated by  
325 the D<sub>1</sub>R-H<sub>3</sub>R heteromer and not just by the blockade of the single H<sub>3</sub>R, then a treatment  
326 paradigm in the absence of the heteromer should have no effect. To test this hypothesis,  
327 we used wild-type Hdh<sup>Q7/Q7</sup> and mutant Hdh<sup>Q7/Q111</sup> mice at the age of 7 months, when  
328 we found the heteromer to be lost. Animals were chronically treated with saline or  
329 thioperamide for 1 month and motor learning was evaluated using the accelerating

330 rotarod task. As expected, saline-Hdh<sup>Q7/Q111</sup> mice exhibited poor performance in this  
331 task showing shorter latency to fall compared to wild-type Hdh<sup>Q7/Q7</sup> mice (**Fig. 6A**).  
332 Notably, thioperamide treatment had no effect on motor learning performance as both  
333 saline- and thioperamide-treated mutant Hdh<sup>Q7/Q111</sup> mice were indistinguishable  
334 demonstrated by similar latency to fall in the accelerating rotarod task (**Fig. 6A**).

335 We next asked whether thioperamide treatment could improve cognitive  
336 function by rescuing memory deficits in these same animals. Saline-treated 8-mo-old  
337 Hdh<sup>Q7/Q111</sup> mice exhibited long-term memory deficits when recognition memory was  
338 analyzed using the novel object recognition test (NORT) (**Fig. 6B**). Similar to motor  
339 learning results, chronic treatment with thioperamide did not rescue Hdh<sup>Q7/Q111</sup> mice  
340 from memory deficits (**Fig. 6B**). Overall, these results demonstrate that the effect of  
341 thioperamide in learning and memory in Hdh<sup>Q7/Q111</sup> mice requires the proper expression  
342 and function of D<sub>1</sub>R-H<sub>3</sub>R heteromers.

343

#### 344 **D<sub>1</sub>R-H<sub>3</sub>R heteromer expression changes occur in other rodent HD models and in** 345 **HD patients**

346 The fact that thioperamide treatment 1) prevents cognitive and motor learning deficits,  
347 2) ameliorates striatal neuropathology, 3) ameliorates morphological alterations and 4)  
348 prevents the loss of D<sub>1</sub>R-H<sub>3</sub>R heteromers at 6 mo and 8 mo of age in a mouse model of  
349 HD is suggestive that thioperamide, or a future pharmacologically improved H<sub>3</sub>R  
350 antagonist specifically targeting D<sub>1</sub>R-H<sub>3</sub>R heteromers, can be used to treat HD  
351 symptoms. To test this, we investigated D<sub>1</sub>R-H<sub>3</sub>R heteromer expression in other  
352 transgenic HD mouse models and in human caudate-putamen slices using PLA. The  
353 loss of heteromer expression compared with wild-type littermates was also observed in  
354 other mouse models of HD, the R6/1 and R6/2 mice transgenic for the human huntingtin

355 exon 1 (**Fig. S15A and B, respectively**). Importantly, D<sub>1</sub>R-H<sub>3</sub>R heteromers were  
356 detected as green spots surrounding the blue stained nuclei in human caudate-putamen  
357 slices from control individuals and low-grade (grade 0, 1 and 2) HD patients (**Fig. 7A**  
358 **and B**). In contrast, green spots were almost absent in samples from high-grade (grade 3  
359 or grade 4) HD patients (**Fig. 7A and B**). These results show that D<sub>1</sub>R-H<sub>3</sub>R heteromer  
360 formation changes during disease progression and, importantly, that humans express  
361 D<sub>1</sub>R-H<sub>3</sub>R heteromers at early disease stages.

362

### 363 **Discussion**

364 The imbalance of dopamine inputs throughout HD progression represents a potential  
365 “point of no return” for HD patients as this disequilibrium can eventually lead to  
366 substantial neuronal dysfunction and cell death. In the present study we demonstrate  
367 that 1) excess dopamine signaling via D<sub>1</sub>R leads to cell death by activating the p38  
368 pathway; 2) D<sub>1</sub>R-H<sub>3</sub>R complexes are found within the striatum, cortex and  
369 hippocampus of WT mice and in HD mice at early but not late disease stages; 3)  
370 targeting D<sub>1</sub>R via D<sub>1</sub>R-H<sub>3</sub>R complexes can slow progression of the disease in early but  
371 not late stages when the complexes are lost; and 4) D<sub>1</sub>R-H<sub>3</sub>R complexes are expressed  
372 in the human brain and thus represent potential therapeutic targets. This is the first  
373 demonstration of GPCR heteromers as potential targets to treat HD. Together, these  
374 data support a novel role for D<sub>1</sub>R-H<sub>3</sub>R complexes in neuroprotection and HD.

375 Several studies have revealed that dopamine neurotoxicity increases the  
376 sensitivity of MSSNs to glutamate inputs and leads to striatal neurodegeneration, a role  
377 ascribed to aberrant D<sub>1</sub>R and not D<sub>2</sub>R (10;14;56;57). Thus, pharmacological treatments  
378 aimed to reduce D<sub>1</sub>R signaling may be beneficial to prevent or slow striatal cell death.  
379 Although we cannot rule out the participation of D<sub>2</sub>R in striatal degeneration, our results

380 suggest that D<sub>1</sub>R is a major executor of the final signaling cascades that lead to cell  
381 death in HD. This is further supported by the fact that D<sub>1</sub>R is in excess over D<sub>2</sub>R in the  
382 striatum, so it is plausible that the former will be more significantly activated than the  
383 latter at increased DA levels. We have demonstrated that a toxic but not sub-toxic  
384 concentration of SKF81297 increases cytosolic calcium levels and activates the p38  
385 pro-apoptotic pathway. Accordingly, p38 inhibitors completely abrogated the cell death  
386 induced by SKF81297 treatment, supporting the benefits of modulation of D<sub>1</sub>R  
387 signaling as potential treatment in HD. However, direct manipulation of DA production  
388 and/or D<sub>1</sub>R signalling via a specific antagonist has limited therapeutic ability due to  
389 associated deleterious side effects. An alternative approach is to modify D<sub>1</sub>R signalling  
390 via the histamine neuromodulator. An interaction between H<sub>3</sub>R and the dopaminergic  
391 system has been previously reported by us and others (58-60). In this frame, we have  
392 demonstrated that H<sub>3</sub>R ligands completely abrogate striatal cell death induced by D<sub>1</sub>R,  
393 likely by inhibition of D<sub>1</sub>R-mediated calcium influx and p38 activation. Importantly,  
394 D<sub>1</sub>R-H<sub>3</sub>R complexes were found in the striatum, cortex and hippocampus from wild-  
395 type Hdh<sup>Q7/Q7</sup> and mutant Hdh<sup>Q7/Q111</sup> mice, regions known to be affected by mutant  
396 huntingtin toxicity (2;61;62).

397 The mechanisms of action of D<sub>1</sub>R-H<sub>3</sub>R heteromers can be multiple including  
398 allosteric effects. Indeed, the efficacy of the disrupting peptides supports protein-  
399 protein-driven effects. A second and potentially additional mechanism is that heteromer  
400 formation may alter the trafficking of D<sub>1</sub>R, which could have pleiotropic consequences  
401 on signaling. The signaling effects we observe appears to be on a variety of  
402 concentrations and timescales in agreement with previous studies showing that GPCR  
403 signaling occurs with varied kinetics (63;64). Indeed, part of the concern of trying to  
404 target GPCR heteromers for therapeutic purposes is the uncertainty around their



405 stability and thus indirectly whether they can impact GPCR signaling at every  
406 timescale. For the case of D<sub>1</sub>R-H<sub>3</sub>R heteromers, it appears that they are stable enough  
407 that they can affect both rapid receptor signaling (e.g., Ca<sup>2+</sup> mobilization) and longer  
408 cell signaling pathways like p38, two events that have previously been involved in  
409 neuronal cell death in HD (65-69).

410 Our findings do not rule out that H<sub>3</sub>R ligands by targeting D<sub>2</sub>R-H<sub>3</sub>R heteromers  
411 (70) could block D<sub>2</sub>R signaling and contribute to cell death protection. However,  
412 several findings argue in favor of D<sub>1</sub>R-H<sub>3</sub>R heteromer as uniquely responsible for the  
413 effects of thioperamide on cell death reduction. First, D<sub>1</sub>R over-activation induces cell  
414 death-related pathways, D<sub>1</sub>R internalization and D<sub>1</sub>R-H<sub>3</sub>R disruption. In addition, pre-  
415 treatment with H<sub>3</sub>R ligands can block D<sub>1</sub>R-induced cell death and prevent D<sub>1</sub>R-H<sub>3</sub>R  
416 loss. Finally, the effect of TAT-peptide analogues of D<sub>1</sub>R transmembrane domains in  
417 D<sub>1</sub>R-H<sub>3</sub>R stability and function demonstrate that we are observing specific D<sub>1</sub>R-H<sub>3</sub>R,  
418 and not D<sub>2</sub>R-H<sub>3</sub>R, signaling and function. Thioperamide has recently been suggested to  
419 act via the H<sub>4</sub>R receptor, however, we received similar effects using the H<sub>3</sub>R antagonist  
420 VUF 5681 and lost any effects in cells where H<sub>3</sub>R expression was silenced, arguing that  
421 the effects are due to D<sub>1</sub>R-H<sub>3</sub>R heteromers.

422 Besides striatal and cortical cell death, growing evidence points to neuronal  
423 dysfunction as responsible for the earliest HD disturbances in cognitive and behavioral  
424 changes (6;71). Despite these early changes, no effective treatments are currently  
425 available to treat cognitive decline in HD. Moreover, the timing of intervention is also  
426 critical, since atrophy and dysfunction progress with age and treatment may be different  
427 according to the stage of illness. In this scenario, and given the well-known role of both  
428 dopamine and histamine in synaptic plasticity and memory (72-80), it is possible that  
429 the therapeutic potential of H<sub>3</sub>R ligands as modulators of D<sub>1</sub>R-H<sub>3</sub>R heteromers could

430 also be extended to improve learning impairments and cognitive decline in HD. This is  
431 supported by our data showing that chronic treatment with the H<sub>3</sub>R antagonist  
432 thioperamide at 5 months of age prevented motor learning deficits, as well as impaired  
433 spatial and recognition memories in mutant Hdh<sup>Q7/Q111</sup> mice. Importantly, thioperamide  
434 treatment does not induce off-target effects (such as alterations in spontaneous  
435 locomotor activity or anxiety-like behaviors) neither in wild-type Hdh<sup>Q7/Q7</sup> nor in  
436 mutant Hdh<sup>Q7/Q111</sup> mice. In addition, early chronic treatment with thioperamide  
437 prevented disruption of the heteromer at 6 and 8 months of age and the subsequent  
438 cognitive decline. It seems unlikely that there is a direct link between D<sub>1</sub>R-H<sub>3</sub>R  
439 heteromers and cognitive deficits, but the data do suggest that whatever neuronal  
440 changes occur during progression of the disease they are blocked or at minimum  
441 delayed. Importantly, we can say that D<sub>1</sub>R-H<sub>3</sub>R heteromers are required for this effect  
442 as thioperamide treatment at 7 months of age (when the heteromer is lost in HD mice) is  
443 not able to prevent cognitive and motor learning deficits. This latter result might  
444 explain the results of the effects that GSK189254, an H<sub>3</sub>R antagonist, have in a Q175  
445 mouse model of HD (81). The authors saw no change in motor performance and mild  
446 improvement in exploratory behavior as measured in the Open Field test and in  
447 cognitive function as measured by a T-maze. Our data suggest that D<sub>1</sub>R-H<sub>3</sub>R heteromer  
448 expression is crucial to the efficacy of H<sub>3</sub>R antagonists as a therapeutic option in HD.

449         What disease-driven neuronal changes are prevented by H<sub>3</sub>R antagonism  
450 through the D<sub>1</sub>R-H<sub>3</sub>R heteromer is not completely clear. However, we did find that  
451 chronic thioperamide treatment at early stages completely rescue the reduction in the  
452 density of spinophilin-immunoreactive puncta in HD mice in both hippocampal and  
453 cortical areas, suggesting that adequate dopaminergic signaling is required for normal  
454 forms of synaptic structural plasticity and cognitive processes. Substantial data support

455 the importance of dopamine receptors for synaptic plasticity in the cortex and  
456 hippocampus (82-84). In this view, any dopamine imbalance with both suboptimal and  
457 supra-optimal dopamine activity has been reported to modify cognitive performance  
458 (85;86). As the early stages of HD may reflect a hyperdopaminergic stage (7;87),  
459 treatments reducing dopamine signaling may have therapeutic benefits. In fact,  
460 dopamine-depleting drugs such as tetrabenazine or dopamine-stabilizers as pridopidine  
461 showed neuroprotective effects in HD mice (88), and improve motor coordination  
462 abnormalities in HD patients (12;89), while specific D<sub>1</sub>R inhibition rescues  
463 electrophysiological changes in excitatory and inhibitory synaptic transmission in full-  
464 length HD mouse models (18). However, none of these treatments have demonstrated  
465 cognitive improvements. The suggestion that D<sub>1</sub>R-H<sub>3</sub>R heteromers may be legitimate  
466 targets for the treatment of HD shines a spotlight on what continues to be an elusive  
467 drug target. Indeed, in the context of this study, the loss of the heteromer in disease  
468 progression despite the fact that the receptors themselves are still expressed and  
469 functional, points to the heteromers as optimal targets rather than the single receptors.  
470 The concept of heteromers have been known for over a decade but physiologic  
471 examples have only recently come to be appreciated (33;37;90-95). In sum, our study  
472 showing that H<sub>3</sub>R antagonists can prevent learning and memory deficits by blocking  
473 D<sub>1</sub>R in D<sub>1</sub>R-H<sub>3</sub>R complexes, along with the role of these heteromers on neuronal cell  
474 death, predict a critical role of the histaminergic system as modulator of the dopamine  
475 imbalance in HD, and may help to overcome the deleterious effects of directly  
476 manipulating DA-production and/or signaling, thus opening new and important  
477 alternatives for HD therapeutics.

478  
479

## 480 **Material and Methods**

481 **Human brain slices.** Paraffin-embedded *post-mortem* 4  $\mu\text{m}$ -thick brain sections  
482 containing caudate-putamen were obtained and provided by the Tissue Bank at Hospital  
483 Universitario Fundación Alcorcón (Madrid, Spain) and the Netherlands Brain Bank  
484 (Amsterdam, The Netherlands) according to the standardized procedures of both  
485 institutions. The samples analyzed were from patients with HD (1 grade 0; 1 grade 1; 2  
486 grade 2; 3 grade 3 and 3 grade 4 patients) or from age matched controls with no  
487 neurological disease (3 subjects). All protocols were approved by the institutional ethic  
488 committees.

489 **Cell cultures.** Conditionally immortalized wild-type STHdh<sup>Q7</sup> and mutant STHdh<sup>Q111</sup>  
490 striatal neuronal progenitor cell lines expressing endogenous levels of normal and  
491 mutant huntingtin with 7 and 111 glutamines, respectively, have been described  
492 previously (96). These cells do not exhibit amino-terminal inclusions allowing the study  
493 of changes involved in early HD pathogenesis (96). Striatal cells were grown at 33°C in  
494 DMEM (Sigma-Aldrich), supplemented with 10% fetal bovine serum (FBS), 1%  
495 streptomycinpenicillin, 2 mM L-glutamine, 1 mM sodium pyruvate, and 400 g/ml G418  
496 (Geneticin; Invitrogen).

497 HEK-293T cells were grown in Dulbecco's modified Eagle's medium (DMEM) (Gibco,  
498 Paisley, Scotland, UK) supplemented with 2 mM L-glutamine, 100  $\mu\text{g}/\text{ml}$  sodium  
499 pyruvate, 100 U/ml penicillin/streptomycin, essential medium non-essential amino acids  
500 solution (1/100) and 5% (v/v) heat inactivated fetal bovine serum (Invitrogen, Paisley,  
501 Scotland, UK) and were maintained at 37°C in an atmosphere with 5% CO<sub>2</sub>. Cells were  
502 transiently transfected with the corresponding fusion protein cDNA using  
503 Lipofectamine 3000 (Invitrogen, Paisley, Scotland, UK).

504 **Animal models of HD.** Knock-in mice, with targeted insertion of 109 CAG repeats that  
505 extends the glutamine segment in murine huntingtin to 111 residues, and the

506 corresponding littermates having 7 glutamine residues were maintained on a C57BL/6  
507 genetic background (97). Hdh<sup>Q7/Q111</sup> heterozygous males and females were intercrossed  
508 to generate age-matched Hdh<sup>Q7/Q111</sup> heterozygous and Hdh<sup>Q7/Q7</sup> wild-type littermates.  
509 Only males were used for all experiments. Hemizygous male mice transgenic for exon 1  
510 of the human huntingtin gene with a greatly expanded CAG repeat (~115 CAG repeats  
511 in R6/1 mice and ~160 CAG repeats in R6/2 mice) (98) and wild-type littermates were  
512 used when indicated in proximity ligation assays. Animals were housed under a 12 h  
513 light/dark cycle with food and water ad libitum. All procedures were carried out in  
514 accordance with the National Institutes of Health and were approved by the local animal  
515 care committee of the Universitat de Barcelona (99/01) and the Generalitat de Catalunya  
516 (00/1094) or the Universidad Complutense de Madrid in accordance with the directives  
517 of the European Commission.

518 **Mouse brain slices preparation.** For PLA experiments, 2-, 4-, 6- and 8-month-old  
519 Hdh<sup>Q7/Q7</sup> and Hdh<sup>Q7/Q111</sup> mice were deeply anesthetized and immediately perfused  
520 transcardially with saline (PBS) followed by 4% paraformaldehyde (PFA)/phosphate  
521 buffer. Brains were removed and post-fixed overnight in the same solution,  
522 cryoprotected by immersion in 10, 20, 30% gradient sucrose (24 hours for each sucrose  
523 gradient) at 4°C and then frozen in dry ice-cooled methylbutane. Serial coronal cryostat  
524 sections (30µm) through the whole brain were collected in PBS-0.025% azide as free-  
525 floating sections and stored at 4°C until PLA experiments were performed. For cell  
526 death determination, Hdh<sup>Q7/Q111</sup> and Hdh<sup>Q7/Q7</sup> mice were killed by cervical dislocation at  
527 the age of 4, 5 and 8 months. Mouse brains were rapidly removed and placed in ice-cold  
528 oxygenated (O<sub>2</sub>/CO<sub>2</sub>: 95%/5%) Krebs-HCO<sub>3</sub><sup>-</sup> buffer (124 mM NaCl, 4 mM KCl, 1.25  
529 mM NaH<sub>2</sub>PO<sub>4</sub>, 1.5 mM MgSO<sub>4</sub>, 1.5 mM CaCl<sub>2</sub>, 10 mM glucose and 26 mM NaHCO<sub>3</sub>,  
530 pH 7.4). Cerebral hemispheres were split and sliced coronally using a McIlwain chopper

531 (Ted Pella, Inc, California) in sterile conditions. Striatum, cortex and hippocampal  
532 slices (300  $\mu\text{m}$  thick) were kept at 4°C in Krebs-HCO<sub>3</sub><sup>-</sup> buffer during the dissection and  
533 transferred into a Millicell Insert (Millipore).

534 **Cell death determination in striatal cells and in mouse organotypic slice cultures.**

535 Striatal STHdh<sup>Q7</sup> or STHdh<sup>Q111</sup> cells were grown to reach 50 % of confluence on 12-  
536 well plates containing 3 cm<sup>2</sup>-glass coverslips. Medium was then replaced by a new  
537 supplemented medium containing 0.5 % FBS. Vehicle, SCH 23390, thioperamide or SB  
538 203580 were added at the indicated concentrations to cells and incubated for 1 h before  
539 the addition of D<sub>1</sub>R. When TAT-TM peptides were applied to cell cultures, these were  
540 added 4 h before the addition of D<sub>1</sub>R agonist. After agonist addition, an additional  
541 incubation period of 24 h was performed. Then cells were washed twice in cold-PBS  
542 and fixed with 4 % paraformaldehyde for 1 h at 4°C. Sample nuclei were stained with  
543 Hoechst 1:1000. Stained cells were then washed with PBS and mounted under glass  
544 coverslips with Mowiol. A minimum of 10 fields were taken from each coverslip using  
545 a fluorescence microscope and the plugin Image-based Tool for Counting Nuclei for  
546 ImageJ was used for the quantification of the total nuclei. In mouse organotypic  
547 cultures, brain slices (300  $\mu\text{m}$  thickness, see above) were cultured for 24 h into a  
548 Millicell Insert in Neurobasal medium supplemented with 20 % horse serum, 0.5% B27,  
549 2 mM L-glutamine, 100  $\mu\text{g}/\text{ml}$  sodium pyruvate, non-essential amino acids solution  
550 (1/100) and 100 units/ml penicillin/streptomycin (all supplements were from Invitrogen,  
551 Paisley, Scotland, UK) before replacing with fresh medium. Vehicle, SCH 23390,  
552 thioperamide were added at the indicated concentrations to organotypic cultures and  
553 incubated for 1 h before the addition of D<sub>1</sub>R agonist. TAT-TM peptides were applied to  
554 cell cultures 4 h before the addition of D<sub>1</sub>R agonist. After agonist addition, an additional  
555 incubation period of 48 h was performed. Then, 10 $\mu\text{M}$  propidium iodide (PI) was added

556 to organotypic cultures and maintained at 37°C for 1 h. Organotypic cultures were  
557 washed twice in cold-PBS and fixed with 4 % paraformaldehyde for 1 h at 4°C. Total  
558 nuclei were stained with Hoechst 1:1000. The Hoechst stained and PI positive nuclei in  
559 organotypic cultures were counted to evaluate cell death in the brain slices.  
560 Quantification was performed using Leica SP2 confocal microscope (20x; UV, 561  
561 lasers) and the quantification performed with the program Image-based Tool for  
562 Counting Nuclei for ImageJ. Cell death is expressed as the percentage of PI positive  
563 cells in the total Hoechst-stained nuclei.

564 **Lentivirus production and cell transduction.** Silencing lentiviral vectors were  
565 produced by co-transfecting HEK293T producing cells with lentiviral silencing  
566 plasmids GIPZ Human histamine H3 receptor shRNA (Clone V3LHS\_638095 or Clone  
567 V3LHS\_638091, Thermo Scientific) with packing plasmid psPAX2 and envelope  
568 coding plasmid pMD2.G (Addgene#12260 and #12259, respectively) using the calcium  
569 phosphate method. For production of control non silencing lentiviral particles the H<sub>3</sub>R  
570 silencing plasmid were substituted with GIPZ Non-silencing Lentiviral shRNA Control  
571 (RHS4346, Thermoscientific). Infectious lentiviral particles were harvested at 48 h post-  
572 transfection, centrifuged 10 minutes at 900 g to get rid of cell debris, and then filtered  
573 through 0.45 µm cellulose acetate filters. The titer of recombinant lentivirus was  
574 determined by serial dilution on HEK293T cells. For lentivirus transduction, striatal  
575 cells were subcultured to 50% confluence, cells were transduced with H<sub>3</sub>R-shRNA-  
576 expressing lentivirus obtained with plasmid (Clone V3LHS\_638095) or control-  
577 shRNA-expressing lentivirus (LV control) at a multiplicity of infection (MOI) of 10 in  
578 the presence of polybrene 5 µg/ml. Virus-containing supernatant was removed after 3 h.  
579 Puromycin was added to the culturing media at the final concentration of 1 µg/ml 2 days  
580 after infection. 5 days after puromycin selection cells were transduced with the second

581 H<sub>3</sub>R-shRNA-expressing lentivirus obtained with plasmid Clone V3LHS\_638091 to  
582 improve the level of silencing achieved. LV control infected cells were re-infected with  
583 control-shRNA-expressing lentivirus. The second infection was carried out as the first  
584 one. Cells were tested 72 h after the second transduction was performed.

585 **RNA and real-time PCR.** RNA was extracted using TRIzol Reagent (Molecular  
586 Research Center). 10 µg of total RNA were treated with RQ1 RNase free DNase  
587 (Promega) according to manufacturer instruction. DNase treated DNA was quantified  
588 again and cDNA was synthesized using 2 µg total RNA with a High Capacity cDNA  
589 Reverse Transcription Kit; (Applied Biosystems). The mRNAs of actin, H<sub>3</sub>R and D<sub>1</sub>R  
590 were amplified by real-time (RT)-PCR using 1 µL cDNA and power SYBER green  
591 PCR Master Mix (Applied Biosystems) on a 7500 Real Time PCR system (Applied  
592 Biosystems). Primer sequences are as follows: MsACT For:  
593 ATGAGCTGCCTGACGGCCAGGTCAT, MsACT Rev:  
594 TGGTACCACCAGACAGCAC TGTGTT, H<sub>3</sub>R For:  
595 GCAACGCGCTGGTCATGCTC, H<sub>3</sub>R Rev: CCCCGGCCAAAGGTCCAACG, D<sub>1</sub>R  
596 FOR: ACCTCTGTGTGATCAGCGTG, AND D<sub>1</sub>R REV:  
597 GCGTATGTCCTGCTCAACCT. Thermal cycling conditions for amplification were  
598 set at 50°C for 2 min and 95°C for 10 min, respectively. PCR denaturing was set at  
599 95°C for 15 s and annealing/extending at 60°C for 60 s for 40 cycles. mRNA levels  
600 normalized for actin are expressed as fold change relative to control cells. The results  
601 were quantified with the comparative C<sub>t</sub> method (known as the 2<sup>-δδC<sub>t</sub></sup> method).

602 **In Situ Proximity Ligation Assays (PLA).** Cells or mouse or human brain slices were  
603 mounted on glass slides and treated or not with the indicated concentrations of receptor  
604 ligands or TAT-TM peptides for the indicated time. Then, cells or slices were thawed at  
605 4°C, washed in 50 mM Tris-HCl, 0.9% NaCl pH 7.8 buffer (TBS), permeabilized with



606 TBS containing 0.01% Triton X-100 for 10 min and successively washed with TBS.  
607 Heteromers were detected using the Duolink II in situ PLA detection Kit (OLink;  
608 Bioscience, Uppsala, Sweden) following the instructions of the supplier. A mixture of  
609 equal amounts of the primary antibodies: guinea pig anti-D<sub>1</sub>R antibody (1/200 Frontier  
610 Institute, Ishikari, Hokkaido, Japan) and rabbit anti-H<sub>3</sub>R antibody (1:200, Alpha  
611 diagnostic, San Antonio, Texas, USA) were used to detect D<sub>1</sub>R-H<sub>3</sub>R heteromers  
612 together with PLA probes detecting guinea pig or rabbit antibodies, Duolink II PLA  
613 probe anti-guinea pig minus and Duolink II PLA probe anti-rabbit plus. Then samples  
614 were processed for ligation and amplification with a Detection Reagent Red and were  
615 mounted using a DAPI-containing mounting medium. Samples were observed in a  
616 Leica SP2 confocal microscope (Leica Microsystems, Mannheim, Germany) equipped  
617 with an apochromatic 63X oil-immersion objective (N.A. 1.4), and a 405 nm and a 561  
618 nm laser lines. For each field of view a stack of two channels (one per staining) and 9 to  
619 15 Z stacks with a step size of 1  $\mu$ m were acquired. For PLA with brain slices, after  
620 image processing, the red channel was depicted in green color to facilitate detection on  
621 the blue stained nucleus and maintaining the color intensity constant for all images. A  
622 quantification of cells containing one or more spots versus total cells (blue nucleus) and,  
623 in cells containing spots, the ratio  $r$  (number of red spots/cell containing spots) were  
624 determined, using the Fiji package (<http://pacific.mpi-cbg.de/>), considering a total of  
625 600-800 cells from 4-10 different fields within each brain region from 3 different mice  
626 per group or from 3 human control subjects, 3 human grade 3 or grade 4 HD patients, 2  
627 grade 0 or grade 1 HD patients or 1 grade 2 HD patient. Nuclei and spots were counted  
628 on the maximum projections of each image stack. After getting the projection, each  
629 channel was processed individually. The nuclei were segmented by filtering with a  
630 median filter, subtracting the background, enhancing the contrast with the Contrast

631 Limited Adaptive Histogram Equalization (CLAHE) plug-in and finally applying a  
632 threshold to obtain the binary image and the regions of interest (ROI) around each  
633 nucleus. Red spots images were also filtered and thresholded to obtain the binary  
634 images. Red spots were counted in each of the ROIs obtained in the nuclei images.

635 **Membrane preparation and radioligand binding.** Striatal cells or mouse striatal,  
636 cortical or hippocampal tissue were homogenized in 50 mM Tris-HCl buffer, pH 7.4,  
637 containing a protease inhibitor mixture (1/1000, Sigma). The cellular debris was  
638 removed by centrifugation at 13,000 g for 5 min at 4°C, and membranes were obtained  
639 by centrifugation at 105,000 g for 1 h at 4 °C. Membranes were washed three more  
640 times at the same conditions before use. Ligand binding was performed with membrane  
641 suspension (0.2 mg of protein/ml) in 50 mM Tris–HCl buffer, pH 7.4 containing 10 mM  
642 MgCl<sub>2</sub>, at 25°C. To obtain saturation curves, membranes were incubated with increasing  
643 free concentrations of [<sup>3</sup>H] SCH 23390 (0.02 nM to 10 nM, PerkinElmer, Boston, MO,  
644 USA) or [<sup>3</sup>H]R-a-methyl histamine (0.1 nM to 20 nM [<sup>3</sup>H]RAMH, Amersham,  
645 Buckinghamshire, UK) providing enough time to achieve stable equilibrium for the  
646 lower ligand concentrations. Nonspecific binding was determined in the presence of 30  
647 μM non-labeled ligand. Free and membrane bound ligand were separated by rapid  
648 filtration of 500 μl aliquots in a cell harvester (Brandel, Gaithersburg, MD, USA)  
649 through Whatman GF/C filters embedded in 0.3% polyethylenimine that were  
650 subsequently washed for 5 s with 5 ml of ice-cold Tris–HCl buffer. The filters were  
651 incubated overnight with 10 ml of Ecoscint H scintillation cocktail (National  
652 Diagnostics, Atlanta, GA, USA) at room temperature and radioactivity counts were  
653 determined using a Tri-Carb 1600 scintillation counter (PerkinElmer, Boston, MO,  
654 USA) with an efficiency of 62%. Protein was quantified by the bicinchoninic acid  
655 method (Pierce Chemical Co., Rockford, IL, USA) using bovine serum albumin

656 dilutions as standard. Monophasic saturation curves were analyzed by non-linear  
657 regression, using the commercial Graft software (Erithacus Software), by fitting the  
658 binding data to the equation previously deduced (equation (3) in (99)).

659 **Immunocytochemistry.** Cells (60% confluence) were treated with vehicle or 30  $\mu$ M  
660 SKF 81297 and after 45 min cells were kept at 4 °C to block endocytosis/exocytosis,  
661 washed twice in cold-PBS, fixed in 4% paraformaldehyde for 15 min and washed with  
662 PBS containing 20 mM glycine (buffer A) to quench the aldehyde groups. After  
663 permeabilization with buffer A containing 0.05% Triton X-100 for 5 min, cells were  
664 washed with buffer A containing 1% bovine serum albumin (blocking solution) for 1 h  
665 and labeled with the primary guinea pig anti-D<sub>1</sub>R antibody (1/100, Frontier Institute,  
666 Ishikari, Hokkaido, Japan, ON at 4°C), washed with blocking solution, and stained with  
667 the secondary goat Alexa Fluor 488 anti-guinea pig antibody (1:100, Jackson  
668 Immunoresearch Laboratories, West Grove, PA, USA, 2 h at RT). Samples were  
669 washed twice with blocking solution, once with buffer A and finally with PBS. Nuclei  
670 were stained with 1:1000 Hoechst. Cells were mounted with Mowiol and observed in a  
671 Leica SP2 confocal microscope.

672 **Signaling in striatal cells.** To determine ERK 1/2 phosphorylation, cells (35,000/well)  
673 were cultured with a non-supplemented medium overnight before pre-treated at 25°C  
674 for 20 min with the antagonists and stimulated for an additional 7 min with the indicated  
675 agonists. Phosphorylation was determined by alpha-screen bead-based technology using  
676 the Amplified Luminescent Proximity Homogeneous Assay kit (PerkinElmer, Waltham,  
677 MA, USA) and the Enspire Multimode Plate Reader (PerkinElmer) following the  
678 instructions of the supplier. To determine calcium release, striatal cells were transfected  
679 with 4  $\mu$ g of GCaMP6 calcium sensor (100) using lipofectamine 3000. After 48 h, cells  
680 were incubated (0.2 mg of protein/ml in 96-well black, clear bottom microtiter plates)

681 with Mg<sup>+2</sup>-free Locke's buffer pH 7.4 (154 mM NaCl, 5.6 mM KCl, 3.6 mM NaHCO<sub>3</sub>,  
682 2.3 mM CaCl<sub>2</sub>, 5.6 mM glucose and 5 mM HEPES) supplemented with 10 μM glycine.  
683 When TAT-TM peptides treatment was performed they were added 1 hour before the  
684 addition of receptor ligands at the indicated concentration. Fluorescence emission  
685 intensity of GCaMP6s was recorded at 515 nm upon excitation at 488 nm on an  
686 EnSpire® Multimode Plate Reader (PerkinElmer, Boston, MO, USA) for 330 s every 5  
687 s and 100 flashes per well. The fluorescence gain was defined as a delta function of  
688  $\Delta F/F(t) = (F(t) - F_0)/F_0$ , where F<sub>0</sub> is the average fluorescence intensity in the first six  
689 measures from the start of recording and F(t) is the fluorescence intensity at a given  
690 time and was expressed in %. To determine p38 phosphorylation, striatal cells (80 %  
691 confluence) were cultured with a non-supplemented medium 4 h before the addition of  
692 the indicated ligand concentration for the indicated time and were lysed with 50 mM  
693 Tris-HCl pH 7.4, 50 mM NaF, 150 mM NaCl, 45 mM β-glycerophosphate, 1% Triton  
694 X-100, 20 μM phenyl-arsine oxide, 0.4 mM NaVO<sub>4</sub> and protease inhibitor cocktail.  
695 Lysates (20 μg protein) were processed for Western blot a mixture of a rabbit anti-  
696 phospho-p38 MAPK (Thr180/Tyr182) antibody (1:1000, Cell Signaling) and a mouse  
697 anti-β-tubulin antibody (1:10,000, Sigma). Bands were visualized by the addition of a  
698 mixture of IRDye 680 anti-rabbit antibody (1:10,000, Sigma) and IRDye 800 anti-  
699 mouse antibody (1:10,000, Sigma) for 2 h at room temperature and scanned by the  
700 Odyssey infrared scanner (LI-COR Biosciences). Band densities were quantified using  
701 the Odyssey scanner software. The level of phosphorylated p38 MAPK was normalized  
702 for differences in loading using the β-tubulin band intensities.

703 **Mice thioperamide treatment.** Thioperamide maleate salt (Sigma-Aldrich, St. Louis,  
704 USA) was prepared fresh daily being dissolved in sterile 0,9% saline (NaCl) in order to  
705 deliver a final dose of 10 mg/kg in a final volume of 0.01 ml/g of body weight, as

706 previously described (101). The vehicle treatment consisted of an equal volume of  
707 saline solution. All injections were given via the intra-peritoneal route (*i.p.*). Three *i.p.*  
708 injections per week were administered to wild-type Hdh<sup>Q7/Q7</sup> and mutant knock-in  
709 Hdh<sup>Q7/Q111</sup> mice from 5 months of age until 6 months of age (when one cohort of  
710 animals was perfused to analyze PLA after behavioral assessment) or until 8 months of  
711 age (when a second cohort of animals were perfused to analyze PLA at this more  
712 advanced disease stage). A total of 11 saline-Hdh<sup>Q7/Q7</sup> mice, 10 thioperamide-Hdh<sup>Q7/Q7</sup>  
713 mice, 7 saline-Hdh<sup>Q7/Q111</sup> mice and 9 thioperamide-Hdh<sup>Q7/Q111</sup> mice were treated. For  
714 these experiments, a total of 11 saline-Hdh<sup>Q7/Q7</sup> mice, 10 thioperamide-Hdh<sup>Q7/Q7</sup> mice, 7  
715 saline-Hdh<sup>Q7/Q111</sup> mice and 9 thioperamide-Hdh<sup>Q7/Q111</sup> mice were treated. Similarly,  
716 three *i.p.* injections per week were administered to wild-type Hdh<sup>Q7/Q7</sup> and mutant  
717 knock-in Hdh<sup>Q7/Q111</sup> mice from 7 months of age until 8 months of age to perform the  
718 behavioral studies when the D<sub>1</sub>R-H<sub>3</sub>R heteromers were lost. For these experiments, a  
719 total of 11 saline-Hdh<sup>Q7/Q7</sup> mice, 12 thioperamide-Hdh<sup>Q7/Q7</sup> mice, 10 saline-Hdh<sup>Q7/Q111</sup>  
720 mice and 11 thioperamide-Hdh<sup>Q7/Q111</sup> mice were treated. All treatments were performed  
721 in the afternoon to avoid the stress caused by the treatments during the behavioral  
722 assessment. Thus, during behavioral analysis treatments were performed after the  
723 evaluation of motor learning or cognitive tasks.

724

725

726

727

728 **Behavior assays.**

729 Accelerating rotarod was performed as previously described (44). Animals were placed  
730 on a motorized rod (30mm diameter). The rotation speed gradually increased from 4 to  
731 40 rpm over the course of 5 min. The time latency was recorded when the animal was  
732 unable to keep up on the rotarod with the increasing speed and fell. Rotarod

733 training/testing was performed as 4 trials per day during 3 consecutive days. A resting  
734 period of one hour was left between trials. The rotarod apparatus was rigorously cleaned  
735 with ethanol between animal trials in order to avoid odors.

736 For T-maze spontaneous alternation task (T-SAT), the T-maze apparatus used was a  
737 wooden maze consisting of three arms, two of them situated at 180° from each other,  
738 and the third, representing the stem arm of the T, situated at 90° with respect to the  
739 other two. All arms were 45 cm long, 8 cm wide and enclosed by a 20 cm wall. Two  
740 identical guillotine doors were placed in the entry of the arms situated at 180°. In the  
741 training trial, one arm was closed (new arm) and mice were placed in the stem arm of  
742 the T (home arm) and allowed to explore this arm and the other available arm (old arm)  
743 for 10 min, after which they were returned to the home cage. After 5 h (LTM), mice  
744 were placed in the stem arm of the T-maze and allowed to freely explore all three arms  
745 for 5 min. The arm preference was determined by calculating the time spent in each arm  
746 x 100/time spent in both arms (old and new arm). The T-maze was rigorously cleaned  
747 with ethanol between animal trials in order to avoid odors.

748 Novel object recognition test (NORT) consisted in a white circular arena with 40 cm  
749 diameter and 40 cm high. Mice were first habituated to the open field arena in the  
750 absence of objects (2 days, 15 min/day). During these two days of habitation, several  
751 parameters were measured to ensure the proper habituation of all mice in the new  
752 ambient. As a measure of anxiety or motivation behaviors, the distance that each mice  
753 rove in the periphery or in the center of the open field arena was measured as the rove  
754 distance in the periphery or in the center x 100/the total distance. The same analysis was  
755 performed by counting the number of entries in the periphery and in the center as well  
756 as the time that each mouse spent exploring the periphery or the center. The total

757 distance that each mice rove during these two days of habituation was also recorded as a  
758 measure to evaluate spontaneous locomotor activity. On the third day, two similar  
759 objects were presented to each mouse during 10 min (A, A' condition) after which the  
760 mice were returned to their home cage. Twenty-four hours later (LTM), the same  
761 animals were re-tested for 5 min in the arena with a familiar and a new object (A, B  
762 condition). The object preference was measured as the time exploring each object  $\times$   
763 100/time exploring both objects. The arena was rigorously cleaned with ethanol  
764 between animal trials in order to avoid odors. Animals were tracked and recorded with  
765 SMART junior software (Panlab, Spain).

766 **Immunohistochemistry, confocal microscopy and immunofluorescence-positive**  
767 **puncta counting.** Saline and thioperamide-treated heterozygous mutant  $Hdh^{Q7/Q111}$  and  
768 WT  $Hdh^{Q7/Q7}$  mice at 6 months of age (n = 3 per group) were deeply anesthetized and  
769 immediately perfused transcardially with saline followed by 4% paraformaldehyde  
770 (PFA)/ phosphate buffer. Brains were removed and postfixed overnight in the same  
771 solution, cryoprotected by immersion in 30% sucrose and then frozen in dry ice-cooled  
772 methylbutane. Serial coronal cryostat sections (30  $\mu$ m) through the whole brain were  
773 collected in PBS as free-floating sections. Sections were rinsed three times in PBS and  
774 permeabilized and blocked in PBS containing 0.3% Triton X-100 and 3% normal goat  
775 serum (Pierce Biotechnology, Rockford, IL) for 15 min at room temperature. The  
776 sections were then washed in PBS and incubated overnight at 4°C with Spinophilin  
777 (1:250, Millipore) antibody that were detected with Cy3 anti-rabbit secondary  
778 antibodies (1:200, Jackson ImmunoResearch, West Grove, PA). As negative controls,  
779 some sections were processed as described in the absence of primary antibody and no  
780 signal was detected. Confocal microscopy analysis and immunofluorescence-positive  
781 puncta counting spinophilin-positive spine-like structures was examined as previously

782 described (44). Briefly, the images were acquired with Zeiss LSM510 META confocal  
783 microscope with HeNe lasers. Images were taken using a  $\times 63$  numerical aperture  
784 objective with  $\times 4$  digital zoom and standard (one Airy disc) pinhole. Three coronal  
785 sections (30  $\mu\text{m}$  thick) per animal (n=3 per group) spaced 0.24 mm apart containing the  
786 motor area M1 or CA1 hippocampus were used. For each slice, we obtained three  
787 fields/cortical layer (I, II/III and V) of the M1 area and three fields/CA1 hippocampus  
788 (*stratum oriens* and *stratum radiatum*). The number and area of spinophilin-positive  
789 puncta were measured using NIH ImageJ version 1.33 by Wayne Rasband (National  
790 Institutes of Health, Bethesda, MD). To analyze spinophilin immunolabeling, brightness  
791 and contrast of fluorescence images were adjusted so that only punctate fluorescence  
792 but no weak diffuse background labeling was visible. In the article, we use the term  
793 ‘puncta’ and ‘cluster’ interchangeable to refer to discrete points of protein at the  
794 fluorescence microscope. Positive puncta/cluster within a specific field was recognized  
795 by identifying the presence of overlapping 10–100 pixels.

796

797 **Western blot analysis.** Saline and thioperamide-treated heterozygous mutant  
798 Hdh<sup>Q7/Q111</sup> and WT Hdh<sup>Q7/Q7</sup>, mice were killed by cervical dislocation at 6 months of  
799 age, after behavioral assessment. Brains were quickly removed, dissected, frozen in dry  
800 ice and stored at  $-80^{\circ}\text{C}$  until use. Protein extraction (n = 5-9 per group, only males) and  
801 western blot analysis were performed as previously described (44). The primary  
802 antibody 1C2 (1:1000, Millipore) was used. Loading control was performed by  
803 reprobing the membranes with an antibody to  $\alpha$ -actin (1:20,000, MP Biochemicals).  
804 ImageJ software was used to quantify the different immunoreactive bands relative to the  
805 intensity of the  $\alpha$ - actin band in the same membranes within a linear range of detection



806 for the enhanced chemiluminescent kit reagent. Data are expressed as the mean  $\pm$  SEM  
807 of band density.

808 **Human brain slices.** Paraffin-embedded *post-mortem* 4  $\mu\text{m}$ -thick brain sections  
809 containing caudate-putamen were obtained and provided by the Tissue Bank at Hospital  
810 Universitario Fundación Alcorcón (Madrid, Spain) and the Netherlands Brain Bank  
811 (Amsterdam, The Netherlands) according to the standardized procedures of both  
812 institutions. The samples analyzed were from patients with HD (1 grade 0; 1 grade 1; 2  
813 grade 2; 3 grade 3 and 3 grade 4 patients) or from age matched controls with no  
814 neurological disease (3 subjects). All protocols were approved by the institutional ethic  
815 committees.

816 **Cell cultures.** Conditionally immortalized wild-type STHdh<sup>Q7</sup> and mutant STHdh<sup>Q111</sup>  
817 striatal neuronal progenitor cell lines expressing endogenous levels of normal and  
818 mutant huntingtin with 7 and 111 glutamines, respectively, have been described  
819 previously (104). These cells do not exhibit amino-terminal inclusions allowing the  
820 study of changes involved in early HD pathogenesis (104). Striatal cells were grown at  
821 33°C in DMEM (Sigma-Aldrich), supplemented with 10% fetal bovine serum (FBS),  
822 1% streptomycinpenicillin, 2 mM L-glutamine, 1 mM sodium pyruvate, and 400 g/ml  
823 G418 (Geneticin; Invitrogen).

824 HEK-293T cells were grown in Dulbecco's modified Eagle's medium (DMEM) (Gibco,  
825 Paisley, Scotland, UK) supplemented with 2 mM L-glutamine, 100  $\mu\text{g}/\text{ml}$  sodium  
826 pyruvate, 100 U/ml penicillin/streptomycin, essential medium non-essential amino acids  
827 solution (1/100) and 5% (v/v) heat inactivated fetal bovine serum (Invitrogen, Paisley,  
828 Scotland, UK) and were maintained at 37°C in an atmosphere with 5% CO<sub>2</sub>. Cells were  
829 transiently transfected with the corresponding fusion protein cDNA using  
830 Lipofectamine 3000 (Invitrogen, Paisley, Scotland, UK).

831 **Animal models of HD.** Knock-in mice, with targeted insertion of 109 CAG repeats that  
832 extends the glutamine segment in murine huntingtin to 111 residues, and the  
833 corresponding littermates having 7 glutamine residues were maintained on a C57BL/6  
834 genetic background (105). Hdh<sup>Q7/Q111</sup> heterozygous males and females were intercrossed  
835 to generate age-matched Hdh<sup>Q7/Q111</sup> heterozygous and Hdh<sup>Q7/Q7</sup> wild-type littermates.  
836 Only males were used for all experiments. Hemizygous male mice transgenic for exon 1  
837 of the human huntingtin gene with a greatly expanded CAG repeat (~115 CAG repeats  
838 in R6/1 mice and ~160 CAG repeats in R6/2 mice) (106) and wild-type littermates were  
839 used when indicated in proximity ligation assays. Animals were housed under a 12 h  
840 light/dark cycle with food and water ad libitum. All procedures were carried out in  
841 accordance with the National Institutes of Health and were approved by the local animal  
842 care committee of the Universitat de Barcelona (99/01) and the Generalitat de Catalunya  
843 (00/1094) or the Universidad Complutense de Madrid in accordance with the directives  
844 of the European Commission.

845 **Mouse brain slices preparation.** For PLA experiments, 2-, 4-, 6- and 8-month-old  
846 Hdh<sup>Q7/Q7</sup> and Hdh<sup>Q7/Q111</sup> mice were deeply anesthetized and immediately perfused  
847 transcardially with saline (PBS) followed by 4% paraformaldehyde (PFA)/phosphate  
848 buffer. Brains were removed and post-fixed overnight in the same solution,  
849 cryoprotected by immersion in 10, 20, 30% gradient sucrose (24 hours for each sucrose  
850 gradient) at 4°C and then frozen in dry ice-cooled methylbutane. Serial coronal cryostat  
851 sections (30µm) through the whole brain were collected in PBS-0.025% azide as free-  
852 floating sections and stored at 4°C until PLA experiments were performed. For cell  
853 death determination, Hdh<sup>Q7/Q111</sup> and Hdh<sup>Q7/Q7</sup> mice were killed by cervical dislocation at  
854 the age of 4, 5 and 8 months. Mouse brains were rapidly removed and placed in ice-cold  
855 oxygenated (O<sub>2</sub>/CO<sub>2</sub>: 95%/5%) Krebs-HCO<sub>3</sub><sup>-</sup> buffer (124 mM NaCl, 4 mM KCl, 1.25

856 mM NaH<sub>2</sub>PO<sub>4</sub>, 1.5 mM MgSO<sub>4</sub>, 1.5 mM CaCl<sub>2</sub>, 10 mM glucose and 26 mM NaHCO<sub>3</sub>,  
857 pH 7.4). Cerebral hemispheres were split and sliced coronally using a McIlwain chopper  
858 (Ted Pella, Inc, California) in sterile conditions. Striatum, cortex and hippocampal  
859 slices (300 μm thick) were kept at 4°C in Krebs-HCO<sub>3</sub><sup>-</sup> buffer during the dissection and  
860 transferred into a Millicell Insert (Millipore).

861 **Cell death determination in striatal cells and in mouse organotypic slice cultures.**

862 Striatal STHdh<sup>Q7</sup> or STHdh<sup>Q111</sup> cells were grown to reach 50 % of confluence on 12-  
863 well plates containing 3 cm<sup>2</sup>-glass coverslips. Medium was then replaced by a new  
864 supplemented medium containing 0.5 % FBS. Vehicle, SCH 23390, thioperamide or SB  
865 203580 were added at the indicated concentrations to cells and incubated for 1 h before  
866 the addition of D<sub>1</sub>R. When TAT-TM peptides were applied to cell cultures, these were  
867 added 4 h before the addition of D<sub>1</sub>R agonist. After agonist addition, an additional  
868 incubation period of 24 h was performed. Then cells were washed twice in cold-PBS  
869 and fixed with 4 % paraformaldehyde for 1 h at 4°C. Sample nuclei were stained with  
870 Hoechst 1:1000. Stained cells were then washed with PBS and mounted under glass  
871 coverslips with Mowiol. A minimum of 10 fields were taken from each coverslip using  
872 a fluorescence microscope and the plugin Image-based Tool for Counting Nuclei for  
873 ImageJ was used for the quantification of the total nuclei. In mouse organotypic  
874 cultures, brain slices (300 μm thickness, see above) were cultured for 24 h into a  
875 Millicell Insert in Neurobasal medium supplemented with 20 % horse serum, 0.5% B27,  
876 2 mM L-glutamine, 100 μg/ml sodium pyruvate, non-essential amino acids solution  
877 (1/100) and 100 units/ml penicillin/streptomycin (all supplements were from Invitrogen,  
878 Paisley, Scotland, UK) before replacing with fresh medium. Vehicle, SCH 23390,  
879 thioperamide were added at the indicated concentrations to organotypic cultures and  
880 incubated for 1 h before the addition of D<sub>1</sub>R agonist. TAT-TM peptides were applied to

881 cell cultures 4 h before the addition of D<sub>1</sub>R agonist. After agonist addition, an additional  
882 incubation period of 48 h was performed. Then, 10 $\mu$ M propidium iodide (PI) was added  
883 to organotypic cultures and maintained at 37°C for 1 h. Organotypic cultures were  
884 washed twice in cold-PBS and fixed with 4 % paraformaldehyde for 1 h at 4°C. Total  
885 nuclei were stained with Hoechst 1:1000. The Hoechst stained and PI positive nuclei in  
886 organotypic cultures were counted to evaluate cell death in the brain slices.  
887 Quantification was performed using Leica SP2 confocal microscope (20x; UV, 561  
888 lasers) and the quantification performed with the program Image-based Tool for  
889 Counting Nuclei for ImageJ. Cell death is expressed as the percentage of PI positive  
890 cells in the total Hoechst-stained nuclei.

891 **Lentivirus production and cell transduction.** Silencing lentiviral vectors were  
892 produced by co-transfecting HEK293 producing cellsT with lentiviral silencing  
893 plasmids GIPZ Human histamine H3 receptor shRNA (Clone V3LHS\_638095 or Clone  
894 V3LHS\_638091, Thermo Scientific) with packing plasmid psPAX2 and envelope  
895 coding plasmid pMD2.G (Addgene#12260 and #12259, respectively) using the calcium  
896 phosphate method. For production of control non silencing lentiviral particles the H<sub>3</sub>R  
897 silencing plasmid were substituted with GIPZ Non-silencing Lentiviral shRNA Control  
898 (RHS4346, Thermoscientific). Infectious lentiviral particles were harvested at 48 h post-  
899 transfection, centrifuged 10 minutes at 900 g to get rid of cell debris, and then filtered  
900 through 0.45  $\mu$ m cellulose acetate filters. The titer of recombinant lentivirus was  
901 determined by serial dilution on HEK293T cells. For lentivirus transduction, striatal  
902 cells were subcultured to 50% confluence, cells were transduced with H<sub>3</sub>R-shRNA-  
903 expressing lentivirus obtained with plasmid (Clone V3LHS\_638095) or control-  
904 shRNA-expressing lentivirus (LV control) at a multiplicity of infection (MOI) of 10 in  
905 the presence of polybrene 5  $\mu$ g/ml. Virus-containing supernatant was removed after 3 h.

906 Puromycin was added to the culturing media at the final concentration of 1 µg/ml 2 days  
907 after infection. 5 days after puromycin selection cells were transduced with the second  
908 H<sub>3</sub>R-shRNA-expressing lentivirus obtained with plasmid Clone V3LHS\_638091 to  
909 improve the level of silencing achieved. LV control infected cells were re-infected with  
910 control-shRNA-expressing lentivirus. The second infection was carried out as the first  
911 one. Cells were tested 72 h after the second transduction was performed.

912 **RNA and real-time PCR.** RNA was extracted using TRIzol Reagent (Molecular  
913 Research Center). 10 µg of total RNA were treated with RQ1 RNase free DNase  
914 (Promega) according to manufacturer instruction. DNase treated DNA was quantified  
915 again and cDNA was synthesized using 2 µg total RNA with a High Capacity cDNA  
916 Reverse Transcription Kit; (Applied Biosystems). The mRNAs of actin, H3R and D1R  
917 were amplified by real-time (RT)-PCR using 1 µL cDNA and power SYBER green  
918 PCR Master Mix (Applied Biosystems) on a 7500 Real Time PCR system (Applied  
919 Biosystems). Primer sequences are as follows: MsACT For:  
920 ATGAGCTGCCTGACGGCCAGGTCAT, MsACT Rev:  
921 TGGTACCACCAGACAGCAC TGTGTT, H<sub>3</sub>R For:  
922 GCAACGCGCTGGTCATGCTC, H<sub>3</sub>R Rev: CCCCGGCCAAAGGTCCAACG, D<sub>1</sub>R  
923 FOR: ACCTCTGTGTGATCAGCGTG, AND D<sub>1</sub>R REV:  
924 GCGTATGTCCTGCTCAACCT. Thermal cycling conditions for amplification were  
925 set at 50°C for 2 min and 95°C for 10 min, respectively. PCR denaturing was set at  
926 95°C for 15 s and annealing/extending at 60°C for 60 s for 40 cycles. mRNA levels  
927 normalized for actin are expressed as fold change relative to control cells. The results  
928 were quantified with the comparative C<sub>t</sub> method (known as the 2<sup>-δδC<sub>t</sub></sup> method).

929 **In Situ Proximity Ligation Assays (PLA).** Cells or mouse or human brain slices were  
930 mounted on glass slides and treated or not with the indicated concentrations of receptor

931 ligands or TAT-TM peptides for the indicated time. Then, cells or slices were thawed at  
932 4°C, washed in 50 mM Tris-HCl, 0.9% NaCl pH 7.8 buffer (TBS), permeabilized with  
933 TBS containing 0.01% Triton X-100 for 10 min and successively washed with TBS.  
934 Heteromers were detected using the Duolink II in situ PLA detection Kit (OLink;  
935 Bioscience, Uppsala, Sweden) following the instructions of the supplier. A mixture of  
936 equal amounts of the primary antibodies: guinea pig anti-D<sub>1</sub>R antibody (1/200 Frontier  
937 Institute, Ishikari, Hokkaido, Japan) and rabbit anti-H<sub>3</sub>R antibody (1:200, Alpha  
938 diagnostic, San Antonio, Texas, USA) were used to detect D<sub>1</sub>R-H<sub>3</sub>R heteromers  
939 together with PLA probes detecting guinea pig or rabbit antibodies, Duolink II PLA  
940 probe anti-guinea pig minus and Duolink II PLA probe anti-rabbit plus. Then samples  
941 were processed for ligation and amplification with a Detection Reagent Red and were  
942 mounted using a DAPI-containing mounting medium. Samples were observed in a  
943 Leica SP2 confocal microscope (Leica Microsystems, Mannheim, Germany) equipped  
944 with an apochromatic 63X oil-immersion objective (N.A. 1.4), and a 405 nm and a 561  
945 nm laser lines. For each field of view a stack of two channels (one per staining) and 9 to  
946 15 Z stacks with a step size of 1 µm were acquired. For PLA with brain slices, after  
947 image processing, the red channel was depicted in green color to facilitate detection on  
948 the blue stained nucleus and maintaining the color intensity constant for all images. A  
949 quantification of cells containing one or more spots versus total cells (blue nucleus) and,  
950 in cells containing spots, the ratio  $r$  (number of red spots/ cell containing spots) were  
951 determined, using the Fiji package (<http://pacific.mpi-cbg.de/>), considering a total of  
952 600-800 cells from 4-10 different fields within each brain region from 3 different mice  
953 per group or from 3 human control subjects, 3 human grade 3 or grade 4 HD patients, 2  
954 grade 0 or grade 1 HD patients or 1 grade 2 HD patient. Nuclei and spots were counted  
955 on the maximum projections of each image stack. After getting the projection, each

956 channel was processed individually. The nuclei were segmented by filtering with a  
957 median filter, subtracting the background, enhancing the contrast with the Contrast  
958 Limited Adaptive Histogram Equalization (CLAHE) plug-in and finally applying a  
959 threshold to obtain the binary image and the regions of interest (ROI) around each  
960 nucleus. Red spots images were also filtered and thresholded to obtain the binary  
961 images. Red spots were counted in each of the ROIs obtained in the nuclei images.

962 **Membrane preparation and radioligand binding.** Striatal cells or mouse striatal,  
963 cortical or hippocampal tissue were homogenized in 50 mM Tris-HCl buffer, pH 7.4,  
964 containing a protease inhibitor mixture (1/1000, Sigma). The cellular debris was  
965 removed by centrifugation at 13,000 g for 5 min at 4°C, and membranes were obtained  
966 by centrifugation at 105,000 g for 1 h at 4 °C. Membranes were washed three more  
967 times at the same conditions before use. Ligand binding was performed with membrane  
968 suspension (0.2 mg of protein/ml) in 50 mM Tris-HCl buffer, pH 7.4 containing 10 mM  
969 MgCl<sub>2</sub>, at 25°C. To obtain saturation curves, membranes were incubated with increasing  
970 free concentrations of [<sup>3</sup>H] SCH 23390 (0.02 nM to 10 nM, PerkinElmer, Boston, MO,  
971 USA) or [<sup>3</sup>H]R-a-methyl histamine (0.1 nM to 20 nM [<sup>3</sup>H]RAMH, Amersham,  
972 Buckinghamshire, UK) providing enough time to achieve stable equilibrium for the  
973 lower ligand concentrations. Nonspecific binding was determined in the presence of 30  
974 μM non-labeled ligand. Free and membrane bound ligand were separated by rapid  
975 filtration of 500 μl aliquots in a cell harvester (Brandel, Gaithersburg, MD, USA)  
976 through Whatman GF/C filters embedded in 0.3% polyethylenimine that were  
977 subsequently washed for 5 s with 5 ml of ice-cold Tris-HCl buffer. The filters were  
978 incubated overnight with 10 ml of Ecoscint H scintillation cocktail (National  
979 Diagnostics, Atlanta, GA, USA) at room temperature and radioactivity counts were  
980 determined using a Tri-Carb 1600 scintillation counter (PerkinElmer, Boston, MO,

981 USA) with an efficiency of 62%. Protein was quantified by the bicinchoninic acid  
982 method (Pierce Chemical Co., Rockford, IL, USA) using bovine serum albumin  
983 dilutions as standard. Monophasic saturation curves were analyzed by non-linear  
984 regression, using the commercial Grafit software (Erithacus Software), by fitting the  
985 binding data to the equation previously deduced (equation (3) in (107)).

986 **Immunocytochemistry.** Cells (60% confluence) were treated with vehicle or 30  $\mu$ M  
987 SKF 81297 and after 45 min cells were kept at 4 °C to block endocytosis/exocytosis,  
988 washed twice in cold-PBS, fixed in 4% paraformaldehyde for 15 min and washed with  
989 PBS containing 20 mM glycine (buffer A) to quench the aldehyde groups. After  
990 permeabilization with buffer A containing 0.05% Triton X-100 for 5 min, cells were  
991 washed with buffer A containing 1% bovine serum albumin (blocking solution) for 1 h  
992 and labeled with the primary guinea pig anti-D<sub>1</sub>R antibody (1/100, Frontier Institute,  
993 Ishikari, Hokkaido, Japan, ON at 4°C), washed with blocking solution, and stained with  
994 the secondary goat Alexa Fluor 488 anti-guinea pig antibody (1:100, Jackson  
995 Immunoresearch Laboratories, West Grove, PA, USA, 2 h at RT). Samples were  
996 washed twice with blocking solution, once with buffer A and finally with PBS. Nuclei  
997 were stained with 1:1000 Hoechst. Cells were mounted with Mowiol and observed in a  
998 Leica SP2 confocal microscope.

999 **Signaling in striatal cells.** To determine ERK 1/2 phosphorylation, cells (35,000/well)  
1000 were cultured with a non-supplemented medium overnight before pre-treated at 25°C  
1001 for 20 min with the antagonists, and stimulated for an additional 7 min with the  
1002 indicated agonists. Phosphorylation was determined by alpha-screen bead-based  
1003 technology using the Amplified Luminescent Proximity Homogeneous Assay kit  
1004 (PerkinElmer, Waltham, MA, USA) and the Enspire Multimode Plate Reader  
1005 (PerkinElmer) following the instructions of the supplier. To determine calcium release,



1006 striatal cells were transfected with 4  $\mu$ g of GCaMP6 calcium sensor (108) using  
1007 lipofectamine 3000. After 48 h, cells were incubated (0.2 mg of protein/ml in 96-well  
1008 black, clear bottom microtiter plates) with  $Mg^{+2}$ -free Locke's buffer pH 7.4 (154 mM  
1009 NaCl, 5.6 mM KCl, 3.6 mM  $NaHCO_3$ , 2.3 mM  $CaCl_2$ , 5.6 mM glucose and 5 mM  
1010 HEPES) supplemented with 10  $\mu$ M glycine. When TAT-TM peptides treatment was  
1011 performed they were added 1 hour before the addition of receptor ligands at the  
1012 indicated concentration. Fluorescence emission intensity of GCaMP6s was recorded at  
1013 515 nm upon excitation at 488 nm on an EnSpire® Multimode Plate Reader  
1014 (PerkinElmer, Boston, MO, USA) for 330 s every 5 s and 100 flashes per well. The  
1015 fluorescence gain was defined as a delta function of  $\Delta F/F(t) = (F(t) - F_0)/F_0$ , where  $F_0$   
1016 is the average fluorescence intensity in the first six measures from the start of recording  
1017 and  $F(t)$  is the fluorescence intensity at a given time and was expressed in %. To  
1018 determine p38 phosphorylation, striatal cells (80 % confluence) were cultured with a  
1019 non-supplemented medium 4 h before the addition of the indicated ligand concentration  
1020 for the indicated time and were lysed with 50 mM Tris-HCl pH 7.4, 50 mM NaF, 150  
1021 mM NaCl, 45 mM  $\beta$ -glycerophosphate, 1% Triton X-100, 20  $\mu$ M phenyl-arsine oxide,  
1022 0.4 mM  $NaVO_4$  and protease inhibitor cocktail. Lysates (20  $\mu$ g protein) were processed  
1023 for Western blot a mixture of a rabbit anti-phospho-p38 MAPK (Thr180/Tyr182)  
1024 antibody (1:1000, Cell Signaling) and a mouse anti- $\beta$ -tubulin antibody (1:10,000,  
1025 Sigma). Bands were visualized by the addition of a mixture of IRDye 680 anti-rabbit  
1026 antibody (1:10,000, Sigma) and IRDye 800 anti-mouse antibody (1:10,000, Sigma) for  
1027 2 h at room temperature and scanned by the Odyssey infrared scanner (LI-COR  
1028 Biosciences). Band densities were quantified using the Odyssey scanner software. The  
1029 level of phosphorylated p38 MAPK was normalized for differences in loading using the  
1030  $\beta$ -tubulin band intensities.

1031 **Mice thioperamide treatment.** Thioperamide maleate salt (Sigma-Aldrich, St. Louis,  
1032 USA) was prepared fresh daily being dissolved in sterile 0,9% saline (NaCl) in order to  
1033 deliver a final dose of 10 mg/kg in a final volume of 0.01 ml/g of body weight, as  
1034 previously described (109). The vehicle treatment consisted of an equal volume of  
1035 saline solution. All injections were given via the intra-peritoneal route (*i.p*). Three *i.p*  
1036 injections per week were administered to wild-type Hdh<sup>Q7/Q7</sup> and mutant knock-in  
1037 Hdh<sup>Q7/Q111</sup> mice from 5 months of age until 6 months of age (when one cohort of  
1038 animals was perfused to analyze PLA after behavioral assessment) or until 8 months of  
1039 age (when a second cohort of animals were perfused to analyze PLA at this more  
1040 advanced disease stage). A total of 11 saline-Hdh<sup>Q7/Q7</sup> mice, 10 thioperamide-Hdh<sup>Q7/Q7</sup>  
1041 mice, 7 saline-Hdh<sup>Q7/Q111</sup> mice and 9 thioperamide-Hdh<sup>Q7/Q111</sup> mice were treated. For  
1042 these experiments, a total of 11 saline-Hdh<sup>Q7/Q7</sup> mice, 10 thioperamide-Hdh<sup>Q7/Q7</sup> mice, 7  
1043 saline-Hdh<sup>Q7/Q111</sup> mice and 9 thioperamide-Hdh<sup>Q7/Q111</sup> mice were treated. Similarly,  
1044 three *i.p* injections per week were administered to wild-type Hdh<sup>Q7/Q7</sup> and mutant  
1045 knock-in Hdh<sup>Q7/Q111</sup> mice from 7 months of age until 8 months of age to perform the  
1046 behavioral studies when the D<sub>1</sub>R-H<sub>3</sub>R heteromers were lost. For these experiments, a  
1047 total of 11 saline-Hdh<sup>Q7/Q7</sup> mice, 12 thioperamide-Hdh<sup>Q7/Q7</sup> mice, 10 saline-Hdh<sup>Q7/Q111</sup>  
1048 mice and 11 thioperamide-Hdh<sup>Q7/Q111</sup> mice were treated. All treatments were performed  
1049 in the afternoon to avoid the stress caused by the treatments during the behavioral  
1050 assessment. Thus, during behavioral analysis treatments were performed after the  
1051 evaluation of motor learning or cognitive tasks.

1052  
1053  
1054  
1055  
1056

**Behavior assays.**

1057 Accelerating rotarod was performed as previously described (44). Animals were placed  
1058 on a motorized rod (30mm diameter). The rotation speed gradually increased from 4 to  
1059 40 rpm over the course of 5 min. The time latency was recorded when the animal was  
1060 unable to keep up on the rotarod with the increasing speed and fell. Rotarod  
1061 training/testing was performed as 4 trials per day during 3 consecutive days. A resting  
1062 period of one hour was left between trials. The rotarod apparatus was rigorously cleaned  
1063 with ethanol between animal trials in order to avoid odors.

1064 For T-maze spontaneous alternation task (T-SAT), the T-maze apparatus used was a  
1065 wooden maze consisting of three arms, two of them situated at 180° from each other,  
1066 and the third, representing the stem arm of the T, situated at 90° with respect to the  
1067 other two. All arms were 45 cm long, 8 cm wide and enclosed by a 20 cm wall. Two  
1068 identical guillotine doors were placed in the entry of the arms situated at 180°. In the  
1069 training trial, one arm was closed (new arm) and mice were placed in the stem arm of  
1070 the T (home arm) and allowed to explore this arm and the other available arm (old arm)  
1071 for 10 min, after which they were returned to the home cage. After 5 h (LTM), mice  
1072 were placed in the stem arm of the T-maze and allowed to freely explore all three arms  
1073 for 5 min. The arm preference was determined by calculating the time spent in each arm  
1074 x 100/time spent in both arms (old and new arm). The T-maze was rigorously cleaned  
1075 with ethanol between animal trials in order to avoid odors.

1076 Novel object recognition test (NORT) consisted in a white circular arena with 40 cm  
1077 diameter and 40 cm high. Mice were first habituated to the open field arena in the  
1078 absence of objects (2 days, 15 min/day). During these two days of habitation, several  
1079 parameters were measured to ensure the proper habituation of all mice in the new  
1080 ambient. As a measure of anxiety or motivation behaviors, the distance that each mice

1081 rove in the periphery or in the center of the open field arena was measured as the rove  
1082 distance in the periphery or in the center  $\times$  100/the total distance. The same analysis was  
1083 performed by counting the number of entries in the periphery and in the center as well  
1084 as the time that each mice spent exploring the periphery or the center. The total distance  
1085 that each mice rove during this two days of habituation was also recorded as a measure  
1086 to evaluate spontaneous locomotor activity. On the third day, two similar objects were  
1087 presented to each mouse during 10 min (A, A' condition) after which the mice were  
1088 returned to their home cage. Twenty-four hours later (LTM), the same animals were re-  
1089 tested for 5 min in the arena with a familiar and a new object (A, B condition). The  
1090 object preference was measured as the time exploring each object  $\times$  100/time exploring  
1091 both objects. The arena was rigorously cleaned with ethanol between animal trials in  
1092 order to avoid odors. Animals were tracked and recorded with SMART junior software  
1093 (Panlab, Spain).

1094 **Immunohistochemistry, confocal microscopy and immunofluorescence-positive**  
1095 **puncta counting.** Saline and thioperamide-treated heterozygous mutant Hdh<sup>Q7/Q111</sup> and  
1096 WT Hdh<sup>Q7/Q7</sup> mice at 6 months of age (n = 3 per group) were deeply anesthetized and  
1097 immediately perfused transcardially with saline followed by 4% paraformaldehyde  
1098 (PFA)/ phosphate buffer. Brains were removed and postfixed overnight in the same  
1099 solution, cryoprotected by immersion in 30% sucrose and then frozen in dry ice-cooled  
1100 methylbutane. Serial coronal cryostat sections (30  $\mu$ m) through the whole brain were  
1101 collected in PBS as free-floating sections. Sections were rinsed three times in PBS and  
1102 permeabilized and blocked in PBS containing 0.3% Triton X-100 and 3% normal goat  
1103 serum (Pierce Biotechnology, Rockford, IL) for 15 min at room temperature. The  
1104 sections were then washed in PBS and incubated overnight at 4°C with Spinophilin  
1105 (1:250, Millipore) antibody that were detected with Cy3 anti-rabbit secondary

1106 antibodies (1:200, Jackson ImmunoResearch, West Grove, PA). As negative controls,  
1107 some sections were processed as described in the absence of primary antibody and no  
1108 signal was detected. Confocal microscopy analysis and immunofluorescence-positive  
1109 puncta counting spinophilin-positive spine-like structures was examined as previously  
1110 described (44). Briefly, the images were acquired with Zeiss LSM510 META confocal  
1111 microscope with HeNe lasers. Images were taken using a  $\times 63$  numerical aperture  
1112 objective with  $\times 4$  digital zoom and standard (one Airy disc) pinhole. Three coronal  
1113 sections (30  $\mu\text{m}$  thick) per animal (n=3 per group) spaced 0.24 mm apart containing the  
1114 motor area M1 or CA1 hippocampus were used. For each slice, we obtained three  
1115 fields/cortical layer (I, II/III and V) of the M1 area and three fields/CA1 hippocampus  
1116 (*stratum oriens* and *stratum radiatum*). The number and area of spinophilin-positive  
1117 puncta were measured using NIH ImageJ version 1.33 by Wayne Rasband (National  
1118 Institutes of Health, Bethesda, MD). To analyze spinophilin immunolabeling, brightness  
1119 and contrast of fluorescence images were adjusted so that only punctate fluorescence  
1120 but no weak diffuse background labeling was visible. In the article, we use the term  
1121 ‘puncta’ and ‘cluster’ interchangeable to refer to discrete points of protein at the  
1122 fluorescence microscope. Positive puncta/cluster within a specific field was recognized  
1123 by identifying the presence of overlapping 10–100 pixels.

1124 **Western blot analysis.** Saline and thioperamide-treated heterozygous mutant  
1125 Hdh<sup>Q7/Q111</sup> and WT Hdh<sup>Q7/Q7</sup>, mice were killed by cervical dislocation at 6 months of  
1126 age, after behavioral assessment. Brains were quickly removed, dissected, frozen in dry  
1127 ice and stored at  $-80^{\circ}\text{C}$  until use. Protein extraction (n = 5-9 per group, only males) and  
1128 western blot analysis were performed as previously described (44). The primary  
1129 antibody 1C2 (1:1000, Millipore) was used. Loading control was performed by  
1130 reprobing the membranes with an antibody to  $\alpha$ -actin (1:20,000, MP Biochemicals).

1131 ImageJ software was used to quantify the different immunoreactive bands relative to the  
1132 intensity of the  $\alpha$ - actin band in the same membranes within a linear range of detection  
1133 for the enhanced chemiluminiscent kit reagent. Data are expressed as the mean  $\pm$  SEM  
1134 of band density.

#### 1135 **Author contributions**

1136 D.M, M.P, S.G and PJM designed the experiments and wrote the manuscript. D.M  
1137 performed and analyzed viability, calcium, internalization and organotypic culture  
1138 experiments. M.P performed all the treatments in mice, conducted and analyzed the  
1139 behavior tests, obtained all the tissue samples and prepared tissue slices for PLA,  
1140 organotypic culture and mRNA experiments, performed and analyzed western blot  
1141 experiments and conducted and analysed spinophilin-immureactive experiments. E.M  
1142 performed PLA experiments and PLA quantification. M.R assisted with function and  
1143 viability experiments in cells and organotypic culture. J.B performed the binding  
1144 experiments and assisted with calcium, internalization and cell death experiments. P.G  
1145 performed all the shRNA related experiments and conducted and analyzed mRNA  
1146 experiments. A.Ch helped with the R6 and human PLA experiments, L.A.H designed,  
1147 synthesized and purified the disrupting peptides, M.S aided with the trafficking  
1148 experiments, An C and V.C performed and analyzed binding experiments, E.C and S.F  
1149 aided with the disrupting peptide experiments, M.G provided all the human samples,  
1150 discussed the results and edited the manuscript. J.A aided with the in vivo experiments  
1151 and analysis. C.LL designed, supervised experiments, discussed, and helped write the  
1152 manuscript. S.G and PJM conceived the idea, designed, supervised and coordinated the  
1153 project, analyzed the results, and wrote the manuscript.

1154

1155  
1156

1157 **Acknowledgements**

1158 We are very grateful to Ana Lopez for technical assistance. Dr. Teresa Rodrigo and the  
1159 staff of the animal care facility (Facultat de Psicologia, Universitat de Barcelona), for  
1160 their support and advice. This work was supported by grants from Ministerio de  
1161 Economia y Competitividad (SAF2012-39142 to S.G., SAF2011-29507 to J.A.,  
1162 SAF2012-35759 to M.G., and SAF2011-23813 to E.C.); Centro de Investigacion  
1163 Biomédicas en Red sobre Enfermedades Neurodegenerativas (CIBERNED  
1164 CB06/05/0064, CB06/05/0054, CB06/05/0042, and CB06/05/0005); Generalitat de  
1165 Catalunya, Spain (2014SGR-00968 to J.A. and 2014SGR-1236 to E.C); Grant  
1166 20140610 from Fundació La Marató de TV3 to E.C.; RSC Grant Project RG140118,  
1167 Jerome LeJeune Foundation FJL-01/01/2013, BBSRC BB/N504282/3 and start-up  
1168 funds from QMUL. We thank Manel Bosch at UB and Paul Thomas at the Henry  
1169 Welcome Laboratory for Cell Imaging at UEA for their help with the microscopy.

1170

1171

Reference List

1172

1173 1. 1993. A novel gene containing a trinucleotide repeat that is expanded and unstable on  
1174 Huntington's disease chromosomes. The Huntington's Disease Collaborative Research Group.  
1175 *Cell* **72**:971-983.

1176 2. Vonsattel,J.P., and DiFiglia,M. 1998. Huntington disease. *J. Neuropathol. Exp. Neurol.* **57**:369-  
1177 384.

1178 3. Vonsattel,J.P., Myers,R.H., Stevens,T.J., Ferrante,R.J., Bird,E.D., and Richardson,E.P., Jr. 1985.  
1179 Neuropathological classification of Huntington's disease. *J. Neuropathol. Exp. Neurol.* **44**:559-  
1180 577.

1181 4. Ferrante,R.J., Kowall,N.W., and Richardson,E.P., Jr. 1991. Proliferative and degenerative  
1182 changes in striatal spiny neurons in Huntington's disease: a combined study using the section-  
1183 Golgi method and calbindin D28k immunocytochemistry. *J. Neurosci.* **11**:3877-3887.

1184 5. Lawrence,A.D., Watkins,L.H., Sahakian,B.J., Hodges,J.R., and Robbins,T.W. 2000. Visual  
1185 object and visuospatial cognition in Huntington's disease: implications for information  
1186 processing in corticostriatal circuits. *Brain* **123** ( Pt 7):1349-1364.

1187 6. Lemiere,J., Decruyenaere,M., Evers-Kiebooms,G., Vandenbussche,E., and Dom,R. 2004.  
1188 Cognitive changes in patients with Huntington's disease (HD) and asymptomatic carriers of the  
1189 HD mutation--a longitudinal follow-up study. *J. Neurol.* **251**:935-942.

- 1190 7. Chen,J.Y., Wang,E.A., Cepeda,C., and Levine,M.S. 2013. Dopamine imbalance in Huntington's  
1191 disease: a mechanism for the lack of behavioral flexibility. *Front Neurosci.* **7**:114.
- 1192 8. Jakel,R.J., and Maragos,W.F. 2000. Neuronal cell death in Huntington's disease: a potential role  
1193 for dopamine. *Trends Neurosci.* **23**:239-245.
- 1194 9. Garret,C., Carruette,A., Fardin,V., Moussaoui,S., Peyronel,J.F., Blanchard,J.C., and  
1195 Laduron,P.M. 1992. [RP 67580, a potent and selective substance P non-peptide antagonist]. *C.*  
1196 *R. Acad. Sci. III* **314**:199-204.
- 1197 10. Paoletti,P., Vila,I., Rife,M., Lizcano,J.M., Alberch,J., and Gines,S. 2008. Dopaminergic and  
1198 glutamatergic signaling crosstalk in Huntington's disease neurodegeneration: the role of  
1199 p25/cyclin-dependent kinase 5. *J. Neurosci.* **28**:10090-10101.
- 1200 11. Ross,C.A., and Tabrizi,S.J. 2011. Huntington's disease: from molecular pathogenesis to clinical  
1201 treatment. *Lancet Neurol.* **10**:83-98.
- 1202 12. 2006. Tetrabenazine as antichorea therapy in Huntington disease: a randomized controlled trial.  
1203 *Neurology* **66**:366-372.
- 1204 13. Mestre,T., Ferreira,J., Coelho,M.M., Rosa,M., and Sampaio,C. 2009. Therapeutic interventions  
1205 for symptomatic treatment in Huntington's disease. *Cochrane. Database. Syst. Rev.* CD006456.
- 1206 14. Tang,T.S., Chen,X., Liu,J., and Bezprozvanny,I. 2007. Dopaminergic signaling and striatal  
1207 neurodegeneration in Huntington's disease. *J. Neurosci.* **27**:7899-7910.
- 1208 15. Cepeda,C., Andre,V.M., Yamazaki,I., Wu,N., Kleiman-Weiner,M., and Levine,M.S. 2008.  
1209 Differential electrophysiological properties of dopamine D1 and D2 receptor-containing striatal  
1210 medium-sized spiny neurons. *Eur. J. Neurosci.* **27**:671-682.
- 1211 16. Kreitzer,A.C., and Malenka,R.C. 2007. Endocannabinoid-mediated rescue of striatal LTD and  
1212 motor deficits in Parkinson's disease models. *Nature* **445**:643-647.
- 1213 17. Andre,V.M., Fisher,Y.E., and Levine,M.S. 2011. Altered Balance of Activity in the Striatal  
1214 Direct and Indirect Pathways in Mouse Models of Huntington's Disease. *Front Syst. Neurosci.*  
1215 **5**:46.
- 1216 18. Andre,V.M., Cepeda,C., Fisher,Y.E., Huynh,M., Bardakjian,N., Singh,S., Yang,X.W., and  
1217 Levine,M.S. 2011. Differential electrophysiological changes in striatal output neurons in  
1218 Huntington's disease. *J. Neurosci.* **31**:1170-1182.
- 1219 19. Beaulieu,J.M., and Gainetdinov,R.R. 2011. The physiology, signaling, and pharmacology of  
1220 dopamine receptors. *Pharmacol. Rev.* **63**:182-217.
- 1221 20. Gimenez-Llort,L., Martinez,E., and Ferre,S. 1997. Different effects of dopamine antagonists on  
1222 spontaneous and NMDA-induced motor activity in mice. *Pharmacol. Biochem. Behav.* **56**:549-  
1223 553.
- 1224 21. Frank,S., Ondo,W., Fahn,S., Hunter,C., Oakes,D., Plumb,S., Marshall,F., Shoulson,I., Eberly,S.,  
1225 Walker,F. et al 2008. A study of chorea after tetrabenazine withdrawal in patients with  
1226 Huntington disease. *Clin. Neuropharmacol.* **31**:127-133.
- 1227 22. Panula,P., and Nuutinen,S. 2013. The histaminergic network in the brain: basic organization and  
1228 role in disease. *Nat. Rev. Neurosci.* **14**:472-487.
- 1229 23. Pillot,C., Heron,A., Cochois,V., Tardivel-Lacombe,J., Ligneau,X., Schwartz,J.C., and  
1230 Arrang,J.M. 2002. A detailed mapping of the histamine H(3) receptor and its gene transcripts in  
1231 rat brain. *Neuroscience* **114**:173-193.



- 1232 24. Ryu,J.H., Yanai,K., and Watanabe,T. 1994. Marked increase in histamine H3 receptors in the  
1233 striatum and substantia nigra after 6-hydroxydopamine-induced denervation of dopaminergic  
1234 neurons: an autoradiographic study. *Neurosci. Lett.* **178**:19-22.
- 1235 25. Ryu,J.H., Yanai,K., Iwata,R., Ido,T., and Watanabe,T. 1994. Heterogeneous distributions of  
1236 histamine H3, dopamine D1 and D2 receptors in rat brain. *Neuroreport* **5**:621-624.
- 1237 26. Moreno,E., Hoffmann,H., Gonzalez-Sepulveda,M., Navarro,G., Casado,V., Cortes,A., Mallol,J.,  
1238 Vignes,M., McCormick,P.J., Canela,E.I. et al 2011. Dopamine D1-histamine H3 receptor  
1239 heteromers provide a selective link to MAPK signaling in GABAergic neurons of the direct  
1240 striatal pathway. *J. Biol. Chem.* **286**:5846-5854.
- 1241 27. Sanchez-Lemus,E., and Arias-Montano,J.A. 2004. Histamine H3 receptor activation inhibits  
1242 dopamine D1 receptor-induced cAMP accumulation in rat striatal slices. *Neurosci. Lett.*  
1243 **364**:179-184.
- 1244 28. Gines,S., Paoletti,P., and Alberch,J. 2010. Impaired TrkB-mediated ERK1/2 activation in  
1245 huntington disease knock-in striatal cells involves reduced p52/p46 Shc expression. *J. Biol.*  
1246 *Chem.* **285**:21537-21548.
- 1247 29. Ferrada,C., Moreno,E., Casado,V., Bongers,G., Cortes,A., Mallol,J., Canela,E.I., Leurs,R.,  
1248 Ferre,S., Lluis,C. et al 2009. Marked changes in signal transduction upon heteromerization of  
1249 dopamine D1 and histamine H3 receptors. *Br. J. Pharmacol.* **157**:64-75.
- 1250 30. Moreno,E., Moreno-Delgado,D., Navarro,G., Hoffmann,H.M., Fuentes,S., Rosell-Vilar,S.,  
1251 Gasperini,P., Rodriguez-Ruiz,M., Medrano,M., Mallol,J. et al 2014. Cocaine disrupts histamine  
1252 H3 receptor modulation of dopamine D1 receptor signaling: sigma1-D1-H3 receptor complexes  
1253 as key targets for reducing cocaine's effects. *J. Neurosci.* **34**:3545-3558.
- 1254 31. Chen,L., Bohanick,J.D., Nishihara,M., Seamans,J.K., and Yang,C.R. 2007. Dopamine D1/5  
1255 receptor-mediated long-term potentiation of intrinsic excitability in rat prefrontal cortical  
1256 neurons: Ca<sup>2+</sup>-dependent intracellular signaling. *J. Neurophysiol.* **97**:2448-2464.
- 1257 32. Jose,P.A., Yu,P.Y., Yamaguchi,I., Eisner,G.M., Mouradian,M.M., Felder,C.C., and Felder,R.A.  
1258 1995. Dopamine D1 receptor regulation of phospholipase C. *Hypertens. Res.* **18 Suppl 1**:S39-  
1259 S42.
- 1260 33. Bonaventura,J., Navarro,G., Casado-Anguera,V., Azdad,K., Rea,W., Moreno,E., Brugarolas,M.,  
1261 Mallol,J., Canela,E.I., Lluis,C. et al 2015. Allosteric interactions between agonists and  
1262 antagonists within the adenosine A2A receptor-dopamine D2 receptor heterotetramer. *Proc.*  
1263 *Natl. Acad. Sci. U. S. A* **112**:E3609-E3618.
- 1264 34. Guitart,X., Navarro,G., Moreno,E., Yano,H., Cai,N.S., Sanchez-Soto,M., Kumar-Barodia,S.,  
1265 Naidu,Y.T., Mallol,J., Cortes,A. et al 2014. Functional selectivity of allosteric interactions  
1266 within G protein-coupled receptor oligomers: the dopamine D1-D3 receptor heterotetramer. *Mol.*  
1267 *Pharmacol.* **86**:417-429.
- 1268 35. Hasbi,A., Perreault,M.L., Shen,M.Y., Zhang,L., To,R., Fan,T., Nguyen,T., Ji,X., O'Dowd,B.F.,  
1269 and George,S.R. 2014. A peptide targeting an interaction interface disrupts the dopamine D1-D2  
1270 receptor heteromer to block signaling and function in vitro and in vivo: effective selective  
1271 antagonism. *FASEB J.* **28**:4806-4820.
- 1272 36. Lee,L.T., Ng,S.Y., Chu,J.Y., Sekar,R., Harikumar,K.G., Miller,L.J., and Chow,B.K. 2014.  
1273 Transmembrane peptides as unique tools to demonstrate the in vivo action of a cross-class  
1274 GPCR heterocomplex. *FASEB J.* **28**:2632-2644.
- 1275 37. Vinals,X., Moreno,E., Lanfumey,L., Cordomi,A., Pastor,A., de La,T.R., Gasperini,P.,  
1276 Navarro,G., Howell,L.A., Pardo,L. et al 2015. Cognitive Impairment Induced by Delta9-  
1277 tetrahydrocannabinol Occurs through Heteromers between Cannabinoid CB1 and Serotonin 5-  
1278 HT2A Receptors. *PLoS Biol.* **13**:e1002194.

- 1279 38. Semenova,M.M., Maki-Hokkonen,A.M., Cao,J., Komarovski,V., Forsberg,K.M., Koistinaho,M.,  
1280 Coffey,E.T., and Courtney,M.J. 2007. Rho mediates calcium-dependent activation of p38alpha  
1281 and subsequent excitotoxic cell death. *Nat. Neurosci.* **10**:436-443.
- 1282 39. Kotowski,S.J., Hopf,F.W., Seif,T., Bonci,A., and von,Z.M. 2011. Endocytosis promotes rapid  
1283 dopaminergic signaling. *Neuron* **71**:278-290.
- 1284 40. Ariano,M.A., Aronin,N., DiFiglia,M., Tagle,D.A., Sibley,D.R., Leavitt,B.R., Hayden,M.R., and  
1285 Levine,M.S. 2002. Striatal neurochemical changes in transgenic models of Huntington's disease.  
1286 *J. Neurosci. Res.* **68**:716-729.
- 1287 41. Lohse,M.J., and Calebiro,D. 2013. Cell biology: Receptor signals come in waves. *Nature*  
1288 **495**:457-458.
- 1289 42. Roed,S.N., Nohr,A.C., Wismann,P., Iversen,H., Brauner-Osborne,H., Knudsen,S.M., and  
1290 Waldhoer,M. 2015. Functional consequences of glucagon-like peptide-1 receptor cross-talk and  
1291 trafficking. *J. Biol. Chem.* **290**:1233-1243.
- 1292 43. Giralt,A., Puigdellivol,M., Carretón,O., Paoletti,P., Valero,J., Parra-Damas,A., Saura,C.A.,  
1293 Alberch,J., and Gines,S. 2012. Long-term memory deficits in Huntington's disease are associated  
1294 with reduced CBP histone acetylase activity. *Hum. Mol. Genet.* **21**:1203-1216.
- 1295 44. Puigdellivol,M., Cherubini,M., Brito,V., Giralt,A., Suelves,N., Ballesteros,J., Zamora-  
1296 Moratalla,A., Martin,E.D., Eipper,B.A., Alberch,J. et al 2015. A role for Kalirin-7 in  
1297 corticostriatal synaptic dysfunction in Huntington's disease. *Hum. Mol. Genet.*
- 1298 45. Brito,V., Giralt,A., Enriquez-Barreto,L., Puigdellivol,M., Suelves,N., Zamora-Moratalla,A.,  
1299 Ballesteros,J.J., Martin,E.D., Dominguez-Iturza,N., Morales,M. et al 2014. Neurotrophin  
1300 receptor p75(NTR) mediates Huntington's disease-associated synaptic and memory dysfunction.  
1301 *J. Clin. Invest* **124**:4411-4428.
- 1302 46. Guidetti,P., Charles,V., Chen,E.Y., Reddy,P.H., Kordower,J.H., Whetsell,W.O., Jr.,  
1303 Schwarcz,R., and Tagle,D.A. 2001. Early degenerative changes in transgenic mice expressing  
1304 mutant huntingtin involve dendritic abnormalities but no impairment of mitochondrial energy  
1305 production. *Exp. Neurol.* **169**:340-350.
- 1306 47. Lynch,G., Kramar,E.A., Rex,C.S., Jia,Y., Chappas,D., Gall,C.M., and Simmons,D.A. 2007.  
1307 Brain-derived neurotrophic factor restores synaptic plasticity in a knock-in mouse model of  
1308 Huntington's disease. *J. Neurosci.* **27**:4424-4434.
- 1309 48. Milnerwood,A.J., Cummings,D.M., Dallerac,G.M., Brown,J.Y., Vatsavayai,S.C., Hirst,M.C.,  
1310 Rezaie,P., and Murphy,K.P. 2006. Early development of aberrant synaptic plasticity in a mouse  
1311 model of Huntington's disease. *Hum. Mol. Genet.* **15**:1690-1703.
- 1312 49. Simmons,D.A., Rex,C.S., Palmer,L., Pandeyarajan,V., Fedulov,V., Gall,C.M., and Lynch,G.  
1313 2009. Up-regulating BDNF with an ampakine rescues synaptic plasticity and memory in  
1314 Huntington's disease knockin mice. *Proc. Natl. Acad. Sci. U. S. A* **106**:4906-4911.
- 1315 50. Sotrel,A., Williams,R.S., Kaufmann,W.E., and Myers,R.H. 1993. Evidence for neuronal  
1316 degeneration and dendritic plasticity in cortical pyramidal neurons of Huntington's disease: a  
1317 quantitative Golgi study. *Neurology* **43**:2088-2096.
- 1318 51. Spires,T.L., Grote,H.E., Garry,S., Cordery,P.M., Van,D.A., Blakemore,C., and Hannan,A.J.  
1319 2004. Dendritic spine pathology and deficits in experience-dependent dendritic plasticity in R6/1  
1320 Huntington's disease transgenic mice. *Eur. J. Neurosci.* **19**:2799-2807.
- 1321 52. Hao,J., Janssen,W.G., Tang,Y., Roberts,J.A., McKay,H., Lasley,B., Allen,P.B., Greengard,P.,  
1322 Rapp,P.R., Kordower,J.H. et al 2003. Estrogen increases the number of spinophilin-  
1323 immunoreactive spines in the hippocampus of young and aged female rhesus monkeys. *J. Comp*  
1324 *Neurol.* **465**:540-550.

- 1325 53. Tang,Y., Janssen,W.G., Hao,J., Roberts,J.A., McKay,H., Lasley,B., Allen,P.B., Greengard,P.,  
1326 Rapp,P.R., Kordower,J.H. et al 2004. Estrogen replacement increases spinophilin-  
1327 immunoreactive spine number in the prefrontal cortex of female rhesus monkeys. *Cereb. Cortex*  
1328 **14**:215-223.
- 1329 54. Arrasate,M., and Finkbeiner,S. 2012. Protein aggregates in Huntington's disease. *Exp. Neurol.*  
1330 **238**:1-11.
- 1331 55. Hoffner,G., Soues,S., and Djian,P. 2007. Aggregation of expanded huntingtin in the brains of  
1332 patients with Huntington disease. *Prion.* **1**:26-31.
- 1333 56. Cepeda,C., and Levine,M.S. 1998. Dopamine and N-methyl-D-aspartate receptor interactions in  
1334 the neostriatum. *Dev. Neurosci.* **20**:1-18.
- 1335 57. Flores-Hernandez,J., Cepeda,C., Hernandez-Echeagaray,E., Calvert,C.R., Jokel,E.S.,  
1336 Fienberg,A.A., Greengard,P., and Levine,M.S. 2002. Dopamine enhancement of NMDA  
1337 currents in dissociated medium-sized striatal neurons: role of D1 receptors and DARPP-32. *J.*  
1338 *Neurophysiol.* **88**:3010-3020.
- 1339 58. Kononoff,V.J., Nuutinen,S., Tuominen,M., and Panula,P. 2016. Histamine H3 Receptor  
1340 Regulates Sensorimotor Gating and Dopaminergic Signaling in the Striatum. *J. Pharmacol. Exp.*  
1341 *Ther.* **357**:264-272.
- 1342 59. Rapanelli,M., Frick,L.R., Pogorelov,V., Ota,K.T., Abbasi,E., Ohtsu,H., and Pittenger,C. 2014.  
1343 Dysregulated intracellular signaling in the striatum in a pathophysiologically grounded model of  
1344 Tourette syndrome. *Eur. Neuropsychopharmacol.* **24**:1896-1906.
- 1345 60. Rapanelli,M., Frick,L.R., Horn,K.D., Schwarcz,R.C., Pogorelov,V., Nairn,A.C., and Pittenger,C.  
1346 2016. The Histamine H3 Receptor Differentially Modulates Mitogen-activated Protein Kinase  
1347 (MAPK) and Akt Signaling in Striatonigral and Striatopallidal Neurons. *J. Biol. Chem.*  
1348 **291**:21042-21052.
- 1349 61. Reiner,A., Albin,R.L., Anderson,K.D., D'Amato,C.J., Penney,J.B., and Young,A.B. 1988.  
1350 Differential loss of striatal projection neurons in Huntington disease. *Proc. Natl. Acad. Sci. U. S.*  
1351 *A* **85**:5733-5737.
- 1352 62. Rosas,H.D., Koroshetz,W.J., Chen,Y.I., Skeuse,C., Vangel,M., Cudkowicz,M.E., Caplan,K.,  
1353 Marek,K., Seidman,L.J., Makris,N. et al 2003. Evidence for more widespread cerebral pathology  
1354 in early HD: an MRI-based morphometric analysis. *Neurology* **60**:1615-1620.
- 1355 63. Calebiro,D., Nikolaev,V.O., and Lohse,M.J. 2010. Imaging of persistent cAMP signaling by  
1356 internalized G protein-coupled receptors. *J. Mol. Endocrinol.* **45**:1-8.
- 1357 64. Calebiro,D., Nikolaev,V.O., Persani,L., and Lohse,M.J. 2010. Signaling by internalized G-  
1358 protein-coupled receptors. *Trends Pharmacol. Sci.* **31**:221-228.
- 1359 65. Dau,A., Gladding,C.M., Sepers,M.D., and Raymond,L.A. 2014. Chronic blockade of  
1360 extrasynaptic NMDA receptors ameliorates synaptic dysfunction and pro-death signaling in  
1361 Huntington disease transgenic mice. *Neurobiol. Dis.* **62**:533-542.
- 1362 66. Fan,J., Gladding,C.M., Wang,L., Zhang,L.Y., Kaufman,A.M., Milnerwood,A.J., and  
1363 Raymond,L.A. 2012. P38 MAPK is involved in enhanced NMDA receptor-dependent  
1364 excitotoxicity in YAC transgenic mouse model of Huntington disease. *Neurobiol. Dis.* **45**:999-  
1365 1009.
- 1366 67. Muller,M., and Leavitt,B.R. 2014. Iron dysregulation in Huntington's disease. *J. Neurochem.*  
1367 **130**:328-350.
- 1368 68. Taylor,D.M., Moser,R., Regulier,E., Breuillaud,L., Dixon,M., Beesen,A.A., Elliston,L., Silva  
1369 Santos,M.F., Kim,J., Jones,L. et al 2013. MAP kinase phosphatase 1 (MKP-1/DUSP1) is

- 1370 neuroprotective in Huntington's disease via additive effects of JNK and p38 inhibition. *J.*  
1371 *Neurosci.* **33**:2313-2325.
- 1372 69. Wang,J.Q., Chen,Q., Wang,X., Wang,Q.C., Wang,Y., Cheng,H.P., Guo,C., Sun,Q., Chen,Q., and  
1373 Tang,T.S. 2013. Dysregulation of mitochondrial calcium signaling and superoxide flashes cause  
1374 mitochondrial genomic DNA damage in Huntington disease. *J. Biol. Chem.* **288**:3070-3084.
- 1375 70. Ferrada,C., Ferre,S., Casado,V., Cortes,A., Justinova,Z., Barnes,C., Canela,E.I., Goldberg,S.R.,  
1376 Leurs,R., Lluís,C. et al 2008. Interactions between histamine H3 and dopamine D2 receptors and  
1377 the implications for striatal function. *Neuropharmacology* **55**:190-197.
- 1378 71. Puigdemívol,M., Saavedra,A., and Perez-Navarro,E. 2016. Cognitive dysfunction in Huntington's  
1379 disease: mechanisms and therapeutic strategies beyond BDNF. *Brain Pathol.* **26**:752-771.
- 1380 72. Cahill,E., Pascoli,V., Trifilieff,P., Savoldi,D., Kappes,V., Luscher,C., Caboche,J., and  
1381 Vanhoutte,P. 2014. D1R/GluN1 complexes in the striatum integrate dopamine and glutamate  
1382 signalling to control synaptic plasticity and cocaine-induced responses. *Mol. Psychiatry*  
1383 **19**:1295-1304.
- 1384 73. Ellender,T.J., Huerta-Ocampo,I., Deisseroth,K., Capogna,M., and Bolam,J.P. 2011. Differential  
1385 modulation of excitatory and inhibitory striatal synaptic transmission by histamine. *J. Neurosci.*  
1386 **31**:15340-15351.
- 1387 74. Haas,H.L., Sergeeva,O.A., and Selbach,O. 2008. Histamine in the nervous system. *Physiol Rev.*  
1388 **88**:1183-1241.
- 1389 75. Komater,V.A., Buckley,M.J., Browman,K.E., Pan,J.B., Hancock,A.A., Decker,M.W., and  
1390 Fox,G.B. 2005. Effects of histamine H3 receptor antagonists in two models of spatial learning.  
1391 *Behav. Brain Res.* **159**:295-300.
- 1392 76. Lopez de,M.R., and Sanchez-Pernaute,R. 2010. Regulation of corticostriatal synaptic plasticity  
1393 by G protein-coupled receptors. *CNS. Neurol. Disord. Drug Targets.* **9**:601-615.
- 1394 77. Mohsen,A., Yoshikawa,T., Miura,Y., Nakamura,T., Naganuma,F., Shibuya,K., Iida,T.,  
1395 Harada,R., Okamura,N., Watanabe,T. et al 2014. Mechanism of the histamine H(3) receptor-  
1396 mediated increase in exploratory locomotor activity and anxiety-like behaviours in mice.  
1397 *Neuropharmacology* **81**:188-194.
- 1398 78. Orsetti,M., Ferretti,C., Gamalero,R., and Ghi,P. 2002. Histamine H3-receptor blockade in the rat  
1399 nucleus basalis magnocellularis improves place recognition memory. *Psychopharmacology*  
1400 (*Berl*) **159**:133-137.
- 1401 79. Pascoli,V., Boer-Saccomani,C., and Hermant,J.F. 2009. H3 receptor antagonists reverse delay-  
1402 dependent deficits in novel object discrimination by enhancing retrieval. *Psychopharmacology*  
1403 (*Berl*) **202**:141-152.
- 1404 80. Wiescholleck,V., and Manahan-Vaughan,D. 2014. Antagonism of D1/D5 receptors prevents  
1405 long-term depression (LTD) and learning-facilitated LTD at the perforant path-dentate gyrus  
1406 synapse in freely behaving rats. *Hippocampus* **24**:1615-1622.
- 1407 81. Whittaker,D.S., Wang,H.B., Loh,D.H., Cachope,R., and Colwell,C.S. 2017. Possible use of a  
1408 H3R antagonist for the management of nonmotor symptoms in the Q175 mouse model of  
1409 Huntington's disease. *Pharmacol. Res. Perspect.* **5**.
- 1410 82. Levy,R., and Goldman-Rakic,P.S. 2000. Segregation of working memory functions within the  
1411 dorsolateral prefrontal cortex. *Exp. Brain Res.* **133**:23-32.
- 1412 83. Robbins,T.W. 2000. From arousal to cognition: the integrative position of the prefrontal cortex.  
1413 *Prog. Brain Res.* **126**:469-483.

- 1414 84. Sajikumar,S., and Frey,J.U. 2004. Late-associativity, synaptic tagging, and the role of dopamine  
1415 during LTP and LTD. *Neurobiol. Learn. Mem.* **82**:12-25.
- 1416 85. Mattay,V.S., Goldberg,T.E., Fera,F., Hariri,A.R., Tessitore,A., Egan,M.F., Kolachana,B.,  
1417 Callicott,J.H., and Weinberger,D.R. 2003. Catechol O-methyltransferase val158-met genotype  
1418 and individual variation in the brain response to amphetamine. *Proc. Natl. Acad. Sci. U. S. A*  
1419 **100**:6186-6191.
- 1420 86. Vijayraghavan,S., Wang,M., Birnbaum,S.G., Williams,G.V., and Arnsten,A.F. 2007. Inverted-U  
1421 dopamine D1 receptor actions on prefrontal neurons engaged in working memory. *Nat.*  
1422 *Neurosci.* **10**:376-384.
- 1423 87. Mochel,F., Durant,B., Durr,A., and Schiffmann,R. 2011. Altered dopamine and serotonin  
1424 metabolism in motorically asymptomatic R6/2 mice. *PLoS. One.* **6**:e18336.
- 1425 88. Wang,H., Chen,X., Li,Y., Tang,T.S., and Bezprozvanny,I. 2010. Tetrabenazine is  
1426 neuroprotective in Huntington's disease mice. *Mol. Neurodegener.* **5**:18.
- 1427 89. de Yebenes,J.G., Landwehrmeyer,B., Squitieri,F., Reilmann,R., Rosser,A., Barker,R.A., Saft,C.,  
1428 Magnet,M.K., Sword,A., Rembratt,A. et al 2011. Pridopidine for the treatment of motor function  
1429 in patients with Huntington's disease (MermaiHD): a phase 3, randomised, double-blind,  
1430 placebo-controlled trial. *Lancet Neurol.* **10**:1049-1057.
- 1431 90. Baba,K., Benleulmi-Chaachoua,A., Journe,A.S., Kamal,M., Guillaume,J.L., Dussaud,S.,  
1432 Gbahou,F., Yettou,K., Liu,C., Contreras-Alcantara,S. et al 2013. Heteromeric MT1/MT2  
1433 melatonin receptors modulate photoreceptor function. *Sci. Signal.* **6**:ra89.
- 1434 91. Fribourg,M., Moreno,J.L., Holloway,T., Provasi,D., Baki,L., Mahajan,R., Park,G., Adney,S.K.,  
1435 Hatcher,C., Eltit,J.M. et al 2011. Decoding the signaling of a GPCR heteromeric complex  
1436 reveals a unifying mechanism of action of antipsychotic drugs. *Cell* **147**:1011-1023.
- 1437 92. Gonzalez,S., Rangel-Barajas,C., Peper,M., Lorenzo,R., Moreno,E., Ciruela,F., Borycz,J.,  
1438 Ortiz,J., Lluís,C., Franco,R. et al 2012. Dopamine D4 receptor, but not the ADHD-associated  
1439 D4.7 variant, forms functional heteromers with the dopamine D2S receptor in the brain. *Mol.*  
1440 *Psychiatry* **17**:650-662.
- 1441 93. Gonzalez,S., Moreno-Delgado,D., Moreno,E., Perez-Capote,K., Franco,R., Mallol,J., Cortes,A.,  
1442 Casado,V., Lluís,C., Ortiz,J. et al 2012. Circadian-related heteromerization of adrenergic and  
1443 dopamine D(4) receptors modulates melatonin synthesis and release in the pineal gland. *PLoS.*  
1444 *Biol.* **10**:e1001347.
- 1445 94. Kern,A., Albarran-Zeckler,R., Walsh,H.E., and Smith,R.G. 2012. Apo-ghrelin receptor forms  
1446 heteromers with DRD2 in hypothalamic neurons and is essential for anorexigenic effects of  
1447 DRD2 agonism. *Neuron* **73**:317-332.
- 1448 95. Navarro,G., Quiroz,C., Moreno-Delgado,D., Sierakowiak,A., McDowell,K., Moreno,E., Rea,W.,  
1449 Cai,N.S., Aguinaga,D., Howell,L.A. et al 2015. Orexin-corticotropin-releasing factor receptor  
1450 heteromers in the ventral tegmental area as targets for cocaine. *J. Neurosci.* **35**:6639-6653.
- 1451 96. Trettel,F., Rigamonti,D., Hilditch-Maguire,P., Wheeler,V.C., Sharp,A.H., Persichetti,F.,  
1452 Cattaneo,E., and MacDonald,M.E. 2000. Dominant phenotypes produced by the HD mutation in  
1453 STHdh(Q111) striatal cells. *Hum. Mol. Genet.* **9**:2799-2809.
- 1454 97. Lloret,A., Dragileva,E., Teed,A., Espinola,J., Fossale,E., Gillis,T., Lopez,E., Myers,R.H.,  
1455 MacDonald,M.E., and Wheeler,V.C. 2006. Genetic background modifies nuclear mutant  
1456 huntingtin accumulation and HD CAG repeat instability in Huntington's disease knock-in mice.  
1457 *Hum. Mol. Genet.* **15**:2015-2024.
- 1458 98. Mangiarini,L., Sathasivam,K., Seller,M., Cozens,B., Harper,A., Hetherington,C., Lawton,M.,  
1459 Trotter,Y., Lehrach,H., Davies,S.W. et al 1996. Exon 1 of the HD gene with an expanded CAG

- 1460 repeat is sufficient to cause a progressive neurological phenotype in transgenic mice. *Cell*  
1461 **87**:493-506.
- 1462 99. Gracia,E., Moreno,E., Cortes,A., Lluís,C., Mallol,J., McCormick,P.J., Canela,E.I., and  
1463 Casado,V. 2013. Homodimerization of adenosine A(1) receptors in brain cortex explains the  
1464 biphasic effects of caffeine. *Neuropharmacology* **71**:56-69.
- 1465 100. Chen,T.W., Wardill,T.J., Sun,Y., Pulver,S.R., Renninger,S.L., Baohan,A., Schreiter,E.R.,  
1466 Kerr,R.A., Orger,M.B., Jayaraman,V. et al 2013. Ultrasensitive fluorescent proteins for imaging  
1467 neuronal activity. *Nature* **499**:295-300.
- 1468 101. Charlier,Y., Brabant,C., Serrano,M.E., Lamberty,Y., and Tirelli,E. 2013. The prototypical  
1469 histamine H3 receptor inverse agonist thioperamide improves multiple aspects of memory  
1470 processing in an inhibitory avoidance task. *Behav. Brain Res.* **253**:121-127.  
1471  
1472
- 1473

1474 **Figure Legends**

1475

1476 **Figure 1. Functional D<sub>1</sub>R-H<sub>3</sub>R heteromers are expressed in STHdH<sup>Q7</sup> and**  
1477 **STHdH<sup>Q111</sup> cells.** PLA were performed in STHdH<sup>Q7</sup> and STHdH<sup>Q111</sup> cells (**A, D, F, H**  
1478 **and J**) or in cells infected with shH<sub>3</sub>R to silence H<sub>3</sub>R, observed as green stained cells  
1479 due to the GFP expression included in the plasmid (**A**). D<sub>1</sub>R-H<sub>3</sub>R heteromers were  
1480 visualized in STHdH cells as red spots around blue colored DAPI stained nucleus, but  
1481 not in STHdH cells infected with shH<sub>3</sub>R vector (**A**). Calcium increases were measured  
1482 in STHdH<sup>Q7</sup> (**B, E and I**) or STHdH<sup>Q111</sup> (**C, G and K**). Cells were treated (20 min) or  
1483 not with the H<sub>3</sub>R antagonist thioperamide (10 μM) before the addition of vehicle or SKF  
1484 81297 (1 μM). In (**D, E, F, G, H, I, J and K**), STHdH<sup>Q7</sup> (**D, E, H and I**) or STHdH<sup>Q111</sup>  
1485 (**F, G, J and K**) cells were also pre-treated for 60 min with 4 μM TM5 (**D, E, F and G**)  
1486 or TM7 (**H, I, J and K**) peptides. Heteromers were visualized as red spots around DAPI  
1487 (blue) stained nucleus in cells pre-treated with TM7 peptide. Scale: 20 μm. For each  
1488 calcium curve values are expressed as a percentage increase with respect to untreated  
1489 cells and are a mean ± SEM of 3 to 5 independent experiments. In (**L and M**), cell  
1490 viability was determined in STHdH<sup>Q7</sup> (**L**) or STHdH<sup>Q111</sup> cells (**M**) pre-treated for 60  
1491 min with vehicle (white columns), with 4 μM TAT-TM7 (pale grey columns) or TAT-  
1492 TM5 (grey columns) or infected with shH<sub>3</sub>R to silence H<sub>3</sub>R (dark grey columns) prior  
1493 overstimulation with 30 μM SKF 81297. Values represent mean ± SEM (n = 24 to 30)  
1494 of cell viability recovery expressed as in-fold respect to SKF 81297 treated cells.  
1495 Student's t test showed a significant (\*\*\*)p < 0.001) effect over SKF 81297 treated cells.

1496

1497 **Figure 2. Functional D<sub>1</sub>R-H<sub>3</sub>R heteromers are expressed in wild-type Hdh<sup>Q7/Q7</sup>**  
1498 **and mutant Hdh<sup>Q7/Q111</sup> mice.** Striatal, cortical or hippocampal slices from 4-month-old

1499 Hdh<sup>Q7/Q7</sup> and Hdh<sup>Q7/Q111</sup> mice were used. In (A), by Proximity Ligation Assays (PLA)  
1500 D<sub>1</sub>R-H<sub>3</sub>R heteromers were visualized in all slices as green spots around blue colored  
1501 DAPI stained nucleus. Scale bar: 20 μm. In (B), the number of cells containing one or  
1502 more green spots is expressed as the percentage of the total number of cells (blue  
1503 nucleus). *r values* (number of green spots/cell containing spots) are shown above each  
1504 bar. Data (% of positive cells or *r*) are the mean ± SEM of counts in 600-800 cells from  
1505 4-8 different fields from 3 different animals. Student's *t* test showed no significant  
1506 differences in heteromers expression in Hdh<sup>Q7/Q7</sup> and Hdh<sup>Q7/Q111</sup> mice. In (C), striatal,  
1507 cortical or hippocampal organotypic slice cultures from 4-month-old Hdh<sup>Q7/Q7</sup> and  
1508 Hdh<sup>Q7/Q111</sup> mice were treated for 60 min with vehicle, the D<sub>1</sub>R antagonist SCH 23390  
1509 (10 μM) or H<sub>3</sub>R antagonist thioperamide (10 μM) before the addition of SKF 81297 (50  
1510 μM). After 48h cell death was determined. Values represent mean ± SEM (n = 3 to 19)  
1511 of percentage of cell death. One-way ANOVA followed by Bonferroni post hoc tests  
1512 showed a significant effect over non-treated organotypic cultures (\*\*p < 0.001) or of  
1513 the H<sub>3</sub>R antagonist plus SKF 81297 treatment over the SKF 81297 (###p < 0.001).

1514

1515

1516 **Figure 3. Functional D<sub>1</sub>R-H<sub>3</sub>R heteromers are expressed in wild-type Hdh<sup>Q7/Q7</sup> but**  
1517 **not in 8-month-old mutant Hdh<sup>Q7/Q111</sup> mice.** Striatal, cortical or hippocampal slices  
1518 from 8-month-old Hdh<sup>Q7/Q7</sup> and Hdh<sup>Q7/Q111</sup> mice were used. In (A), by Proximity  
1519 Ligation Assays (PLA) D<sub>1</sub>R-H<sub>3</sub>R heteromers were visualized in Hdh<sup>Q7/Q7</sup> mice but not  
1520 in Hdh<sup>Q7/Q111</sup> mice as green spots around blue colored DAPI stained nucleus. Scale bar:  
1521 20 μm. In (B), the number of cells containing one or more green spots is expressed as  
1522 the percentage of the total number of cells (blue nucleus). *r values* (number of green  
1523 spots/cell containing spots) are shown above each bar. Data (% of positive cells or *r*) are



1524 the mean  $\pm$  SEM of counts in 600-800 cells from 5-7 different fields from 3 different  
1525 animals. Student's t test showed a significant (\*\*\*) $p < 0.05$ ) decrease of heteromers  
1526 expression in Hdh<sup>Q7/Q111</sup> mice compared to the respective Hdh<sup>Q7/Q7</sup> mice. In (C) striatal,  
1527 cortical or hippocampal organotypic slice cultures from 8-month-old Hdh<sup>Q7/Q7</sup> and  
1528 Hdh<sup>Q7/Q111</sup> mice were treated for 60 min with medium, the D<sub>1</sub>R antagonist SCH 23390  
1529 (10  $\mu$ M) or the H<sub>3</sub>R antagonist thioperamide (10  $\mu$ M) before the addition of SKF 81297  
1530 (50  $\mu$ M) and cell death was determined. Values represent mean  $\pm$  SEM (n = 3 to 6) of  
1531 percentage of cell death. One-way ANOVA followed by Bonferroni post hoc tests  
1532 showed a significant effect over non-treated organotypic cultures (\* $p < 0.05$ ) or of the  
1533 H<sub>3</sub>R antagonist plus SKF 81297 treatment over the SKF 81297 (<sup>#</sup> $p < 0.05$ ).

1534

1535

1536 **Figure 4. Thioperamide chronic treatment prevents motor learning, long-term**  
1537 **memory (LTM) deficits and the loss of receptor heteromerization in 6-month-old**  
1538 **Hdh<sup>Q7/Q111</sup> mice.** In (A), curves illustrating the latency to fall in the accelerating rotarod  
1539 of 6-month-old Hdh<sup>Q7/Q7</sup> and Hdh<sup>Q7/Q111</sup> mice treated with saline or thioperamide from 5  
1540 months of age are shown. In (B), the exploration time for saline or thioperamide-treated  
1541 Hdh<sup>Q7/Q7</sup> and Hdh<sup>Q7/Q111</sup> mice during the training and the testing (24 h delay, LTM)  
1542 sessions in a novel-object recognition task showing that long-term recognition memory  
1543 deficits are rescued in the thioperamide-treated Hdh<sup>Q7/Q111</sup> mice. One-way ANOVA  
1544 with Bonferroni *post hoc* showed significant differences (\*\*\*) $p < 0.001$ ) compared to the  
1545 old object recognition. In (C), bar diagram illustrating the exploration time for saline- or  
1546 thioperamide-treated Hdh<sup>Q7/Q7</sup> and Hdh<sup>Q7/Q111</sup> mice during the training and the 5 h later  
1547 testing in the T-SAT showing thioperamide reverses spatial long-term memory (LTM)  
1548 deficits. In (a to c), 11 saline-treated Hdh<sup>Q7/Q7</sup> mice, 10 thioperamide-treated Hdh<sup>Q7/Q7</sup>

1549 mice, 7 saline-treated Hdh<sup>Q7/Q111</sup> mice and 9 thioperamide-treated Hdh<sup>Q7/Q111</sup> mice were  
1550 evaluated at 6 months of age. In (D) PLA were performed in striatal, cortical and  
1551 hippocampal slices from 6-month-old Hdh<sup>Q7/Q7</sup> and Hdh<sup>Q7/Q111</sup> mice treated with  
1552 thioperamide. D<sub>1</sub>R-H<sub>3</sub>R heteromers were visualized in all samples as green spots around  
1553 blue colored DAPI stained nucleus. Scale bar: 20 μm. In (E) the right panel, the number  
1554 of cells containing one or more green spots is expressed as the percentage of the total  
1555 number of cells (blue nucleus). *r values* (number of green spots/cell containing spots)  
1556 are shown above each bar. Data (% of positive cells or *r*) are the mean ± SEM of counts  
1557 in 600-800 cells from 4-8 different fields from 3 different animals. Student's *t* test  
1558 showed no significant differences in heteromer expression in thioperamide-treated  
1559 Hdh<sup>Q7/Q111</sup> mice compared to the respective Hdh<sup>Q7/Q7</sup> mice.

1560

1561 **Figure 5. Thioperamide treatment restored spinophilin-immunoreactive puncta**  
1562 **reduction in the hippocampus and motor cortex of Hdh<sup>Q7/Q111</sup> mice and exerts no**  
1563 **effect on the clearance of mutant huntingtin accumulation.** In (A) spinophilin-  
1564 immunoreactive puncta were counted in the *stratum oriens* and *stratum radiatum* of  
1565 CA1 hippocampus and in (B) layers I, II/III and V of motor cortex area 1 (M1) of saline  
1566 and thioperamide-treated WT Hdh<sup>Q7/Q7</sup> and knock-in Hdh<sup>Q7/Q111</sup> mice. Quantitative  
1567 analysis is shown as mean ± SEM (n= 9 images from three animals/group). Statistical  
1568 analysis was performed using Student's two-tailed *t* test. \**p*<0.05, \*\*\**p*<0.001  
1569 compared to saline-treated Hdh<sup>Q7/Q7</sup> mice. #*p*<0.05, ##*p*<0.01, ###*p*<0.001 compared to  
1570 saline-treated Hdh<sup>Q7/Q111</sup> mice. In (C), Quantification of the protein levels of insoluble  
1571 mHtt oligomeric forms and soluble mHtt forms of total striatal, hippocampal and  
1572 cortical extracts from 6-month-old saline and thioperamide-treated knock-in Hdh<sup>Q7/Q111</sup>

1573 mice analysed by immunoblot. All histograms represent the mean  $\pm$  SEM (n=6-8 per  
1574 group). Student's *t* test showed no significant differences between groups.

1575

1576

1577 **Figure 6. Thioperamide chronic treatment does not prevent motor learning and**

1578 **long-term memory (LTM) deficits in 8-month-old Hdh<sup>Q7/Q111</sup> mice when the D<sub>1</sub>R-**

1579 **H<sub>3</sub>R heteromer is not expressed.** In (A), curves illustrating the latency to fall in the

1580 accelerating rotarod of 8-month-old Hdh<sup>Q7/Q7</sup> and Hdh<sup>Q7/Q111</sup> mice treated with saline or

1581 thioperamide from 7 months of age are shown. Two-way ANOVA with repeated

1582 measures showed significant differences (\*\*p<0.01) of saline-treated Hdh<sup>Q7/Q111</sup> mice

1583 compared to saline-treated Hdh<sup>Q7/Q7</sup> mice or (##p<0.01) thioperamide-treated Hdh<sup>Q7/Q111</sup>

1584 mice compared to saline-treated Hdh<sup>Q7/Q7</sup> mice. 11 saline-treated Hdh<sup>Q7/Q7</sup> mice, 11

1585 thioperamide-treated Hdh<sup>Q7/Q7</sup> mice, 8 saline-treated Hdh<sup>Q7/Q111</sup> mice and 9

1586 thioperamide-treated Hdh<sup>Q7/Q111</sup> mice were evaluated at 8 months of age. In (B), bar

1587 diagram illustrating the exploration time for saline or thioperamide-treated Hdh<sup>Q7/Q7</sup> and

1588 Hdh<sup>Q7/Q111</sup> mice during the training and the testing (24 h delay, LTM) sessions in a

1589 novel-object recognition task showing that long-term recognition memory deficits are

1590 not rescued in the thioperamide-treated Hdh<sup>Q7/Q111</sup> mice. One-way ANOVA with

1591 Bonferroni *post hoc* comparisons showed significant differences (\*\*p<0.001)

1592 compared to the old object recognition. 11 saline-treated Hdh<sup>Q7/Q7</sup> mice, 12

1593 thioperamide-treated Hdh<sup>Q7/Q7</sup> mice, 10 saline-treated Hdh<sup>Q7/Q111</sup> mice and 11

1594 thioperamide-treated Hdh<sup>Q7/Q111</sup> mice were evaluated at 8 months of age.

1595

1596

1597 **Figure 7. Striatal D<sub>1</sub>R-H<sub>3</sub>R heteromers are expressed in human control subjects**  
1598 **and grade 2 HD patients but not in grade 3-4 HD patients.** In (A), by Proximity  
1599 Ligation Assays (PLA), D<sub>1</sub>R-H<sub>3</sub>R heteromers were visualized as green spots around  
1600 blue colored DAPI stained nucleus in human striatal slices from age matched control  
1601 subjects and 0-2 grade HD patients but not in 3-4 grade HD patients. Scale bar: 20  $\mu$ m.  
1602 In (B), the number of cells containing one or more green spots is expressed as the  
1603 percentage of the total number of cells (blue nucleus). *r values* (number of green  
1604 spots/cell containing spots) are shown above each bar. Data are mean  $\pm$  SEM of counts  
1605 in 600-800 cells from 10 different fields from subject described in Materials and  
1606 Methods. Student's t test showed a significant (\*\*\*)p<0.001) decrease of heteromers  
1607 expression in 3-4 grade HD patients compared to control subjects.

1608

#### 1609 **Supplemental Figure Legends**

1610 **Figure S1. Negative controls for Proximity Ligation Assays (PLA) in striatal cells**  
1611 **not depleted or H<sub>3</sub>R depleted by shRNA.** In (A), Proximity Ligation Assays (PLA)  
1612 were performed in STHdH<sup>Q7</sup> and STHdH<sup>Q111</sup> cells not H<sub>3</sub>R depleted but infected with  
1613 GIPZ Non-silencing Lentiviral shRNA Control plasmid. D<sub>1</sub>R-H<sub>3</sub>R heteromers were  
1614 visualized as red spots around blue colored DAPI stained nucleus (left panels), in  
1615 infected cells stained in green due to the GFP expression included in the plasmid  
1616 (middle panel). Merge images are given in the right panels. In (B), controls showing  
1617 that H<sub>3</sub>R mRNA is not present in cells depleted of H<sub>3</sub>R by shRNA. STHdH<sup>Q7</sup> and  
1618 STHdH<sup>Q111</sup> cells were not infected or infected with lentiviral silencing plasmid GIPZ  
1619 Human histamine H3 receptor shRNA (shH<sub>3</sub>R). Values represent fold change respect to  
1620 non-silencing vector. In (C) controls showing the lack of H<sub>3</sub>R stimulated signaling in  
1621 cells depleted of H<sub>3</sub>R by shRNA. STHdH<sup>Q7</sup> or STHdH<sup>Q111</sup> cells were not stimulated

1622 (basal) or stimulated with the H<sub>3</sub>R agonist imetit (100 nM) and ERK 1/2  
1623 phosphorylation was determined. Values represent mean ± SEM (n = 3) of percentage  
1624 of phosphorylation relative to basal levels found in untreated cells. Student's *t* test  
1625 showed significant differences over basal conditions (\*p<0.05, \*\*\*p<0.001). In **(D)**,  
1626 PLA were performed in the absence of the D<sub>1</sub>R primary antibody using STHdH<sup>Q7</sup> or  
1627 STHdH<sup>Q111</sup> cells not infected (left panels) or infected (right panels) with GIPZ Non-  
1628 silencing Lentiviral shRNA Control plasmid. Scale bar: 20 μm.  
1629

1630 **Figure S2. H<sub>3</sub>R ligands revert the D<sub>1</sub>R-mediated decreases in STHdH<sup>Q7</sup> and**  
1631 **STHdH<sup>Q111</sup> cell viability.** STHdH<sup>Q7</sup> (A) or STHdH<sup>Q111</sup> (B) cells were treated for 20  
1632 min with vehicle, D<sub>1</sub>R antagonist SCH 23390 (1 μM) or the H<sub>3</sub>R antagonist  
1633 thioperamide (1 μM) before the addition of SKF 81297 (100 nM) for an additional  
1634 incubation period of 10 min and ERK 1/2 phosphorylation was determined. Values  
1635 represent mean ± SEM (n = 3 to 4) of percentage of phosphorylation relative to basal  
1636 levels found in untreated cells (control). One-way ANOVA followed by Bonferroni post  
1637 hoc tests showed a significant effect over basal (\*\*p < 0.001) or over SKF 81297  
1638 treatment (<sup>##</sup>p < 0.01). In (C, D), cell viability was determined in STHdH<sup>Q7</sup> (black  
1639 curves) or STHdH<sup>Q111</sup> cells (red curves) pre-treated for 60 min with vehicle (C), or with  
1640 the H<sub>3</sub>R antagonist thioperamide 10 μM (B) prior overstimulation with SKF 81297  
1641 (increasing concentrations in A or 30 μM in B). Values represent mean ± SEM (n = 24  
1642 to 30) of percentage of viable cells respect to vehicle-treated cells (C) or the cell  
1643 viability recovery expressed as in-fold respect to SKF 81297 treated cells (D). In (E and  
1644 F) the effect of D<sub>1</sub>R antagonist, H<sub>3</sub>R antagonist and silencing vector transfection in  
1645 striatal cells viability is shown. STHdH<sup>Q7</sup> and STHdH<sup>Q111</sup> cells were not infected (E) or  
1646 infected (F) with GIPZ Non-silencing Lentiviral shRNA Control plasmid. Cells were  
1647 pretreated for 60 min with vehicle, 10 μM SCH 23390 or 10 μM thioperamide prior  
1648 over-stimulation with SKF 81297 (30 μM). Values represent mean ± SEM (n = 7 to 22)  
1649 of percentage of viable cells respect to vehicle-treated cells (E) or the cell viability  
1650 recovery expressed as in-fold respect to SKF 81297 treated cells (F). Student's *t* test  
1651 showed a significant (\*\*p < 0.001) effect over not treated cells (E) or SKF 81297  
1652 treated cells (F).

1653

1654

1655

1656

1657

1658

1659

1660 **Figure S3. H<sub>3</sub>R ligands revert the D<sub>1</sub>R-mediated decreases in cell viability in**  
1661 **STHdH<sup>Q7</sup> and STHdH<sup>Q111</sup> by modulating calcium signaling and p38**  
1662 **phosphorylation.**

1663 In (A and B), STHdH<sup>Q7</sup> (A) or STHdH<sup>Q111</sup> (B) cells were pre-treated for 20 min with  
1664 vehicle or with the H<sub>3</sub>R antagonist thioperamide (10 μM) and were not stimulated or  
1665 overstimulated with SKF 81297 (30 μM) prior intracellular calcium release  
1666 determination. For each curve values are expressed as a percentage of increase with  
1667 respect to untreated not overstimulated cells and are mean ± SEM of 3 to 9 independent  
1668 experiments. In (C), STHdH<sup>Q7</sup> or STHdH<sup>Q111</sup> cells were treated for 20 min with  
1669 medium (control), with SB 203580 (10 μM) or with the H<sub>3</sub>R antagonist thioperamide  
1670 (10 μM). Cells were overstimulated with SKF 81297 (30 μM) and p38 phosphorylation  
1671 was determined. Values represent mean ± SEM (n = 3) and are expressed as percentage  
1672 over control. One-way ANOVA followed by Bonferroni post hoc tests showed a  
1673 significant effect over control (\*\*p < 0.01, \*\*\*p < 0.001) or over SKF 81297 treatment  
1674 (#p < 0.05, ##p < 0.01, ###p < 0.001). In (D), cell viability was determined in STHdH<sup>Q7</sup>  
1675 (black curves) or STHdH<sup>Q111</sup> cells (red curves) pre-treated for 60 min with the p38  
1676 inhibitor SB 203580 prior overstimulation with SKF 81297 (30 μM). Values represent  
1677 mean ± SEM (n = 24 to 30) of the cell viability recovery expressed as in-fold respect to  
1678 SKF 81297 treated cells (D).

1679

1680 **Figure S4. Effect of low and high SKF 81297 concentrations in p-p38 and**  
1681 **intracellular calcium release. STHdH<sup>Q7</sup> (A and C) and STHdH<sup>Q111</sup> (B and D) cells**  
1682 **were time-dependent stimulated with 1 μM or 30 μM SKF 81297 and intracellular**  
1683 **calcium release (A and B) or p-p38 phosphorylation (C and D) was determined. In (A**  
1684 **and B), curves are mean ± SEM of 3 to 6 independent experiments. In (C and D) values**



1685 represent mean  $\pm$  SEM of two independent experiments performed per triplicate of  
1686 percentage of phosphorylation respect to vehicle-treated cells. Student's *t* test showed a  
1687 significant (\**p* < 0.05, \*\**p* < 0.01, \*\*\**p* < 0.001) effect over not treated cells.

1688

1689

1690

1691

1692

1693 **Figure S5. H<sub>3</sub>R ligands revert the D<sub>1</sub>R overstimulation-induced heteromer**  
1694 **disruption in striatal cells.** In (A), superposition of phase contrast and confocal  
1695 microscopy (superimposed Z stacks) images were shown for immunostained D<sub>1</sub>R  
1696 (green) in STHdh<sup>Q7</sup> and STHdh<sup>Q111</sup> cells treated with vehicle (control) or with SKF  
1697 81297 (30  $\mu$ M) for 45 min. In (B), Proximity Ligation Assays (PLA) were performed in  
1698 STHdH<sup>Q7</sup> or STHdH<sup>Q111</sup> cells pre-treated for 60 min with vehicle or with the H<sub>3</sub>R  
1699 antagonist thioperamide (10 $\mu$ M) before addition of medium (in the case of the vehicle  
1700 control) or SKF 81297 (30  $\mu$ M, 45 min). D<sub>1</sub>R-H<sub>3</sub>R heteromers were visualized as red  
1701 spots around blue colored DAPI stained nucleus in control and H<sub>3</sub>R ligands-treated  
1702 cells, but not in SKF 81297 only treated cells. Scale bar: 20  $\mu$ m.

1703 **Figure S6. D<sub>1</sub>R-H<sub>3</sub>R heteromer are expressed in 2-month-old Hdh<sup>Q7/Q7</sup> and**  
1704 **Hdh<sup>Q7/Q111</sup> mice.** Proximity Ligation Assays (PLA) were performed using striatal,  
1705 cortical or hippocampal slices from 2-month-old Hdh<sup>Q7/Q7</sup> and Hdh<sup>Q7/Q111</sup> mice. D<sub>1</sub>R-  
1706 H<sub>3</sub>R heteromers were visualized in all slices as green spots around blue colored DAPI  
1707 stained nucleus. Scale bar: 20  $\mu$ m.

1708

1709

1710 **Figure S7. Negative controls for Proximity Ligation Assays (PLA) in mouse brain**  
1711 **slices.** Proximity Ligation Assays (PLA) were performed in the absence of the primary  
1712 antibody against D<sub>1</sub>R, using striatal, cortical or hippocampal slices from 4-month-old  
1713 Hdh<sup>Q7/Q7</sup> and Hdh<sup>Q7/Q111</sup> mice. In all slices, a lack of green spots around blue colored  
1714 DAPI stained nucleus was observed. Scale bar: 20 μm.

1715

1716 **Figure S8. Expression of D<sub>1</sub>R-H<sub>3</sub>R heteromers in 6-month-old Hdh<sup>Q7/Q7</sup> and**  
1717 **Hdh<sup>Q7/Q111</sup> mice chronically treated with saline.** In (A), Proximity Ligation Assays  
1718 (PLA) were performed in striatal, cortical and hippocampal slices from 6-month-old  
1719 Hdh<sup>Q7/Q7</sup> and Hdh<sup>Q7/Q111</sup> mice treated with saline. D<sub>1</sub>R-H<sub>3</sub>R heteromers were visualized  
1720 as green spots around blue colored DAPI stained nucleus in Hdh<sup>Q7/Q7</sup> mice but not in  
1721 Hdh<sup>Q7/Q111</sup> mice chronically treated with saline. Scale bar: 20 μm. In (B), the number of  
1722 cells containing one or more green spots is expressed as the percentage of the total  
1723 number of cells (blue nucleus). *r values* (number of green spots/cell containing spots)  
1724 are shown above each bar. Data (% of positive cells or *r*) are the mean ± SEM of counts  
1725 in 600-800 cells from 4-8 different fields from 3 different animals. Student's *t* test  
1726 showed significant differences in D<sub>1</sub>R-H<sub>3</sub>R heteromer expression (\*\*\*)*p*<0.001  
1727 compared to the respective Hdh<sup>Q7/Q7</sup> mice.

1728

1729

1730 **Figure S9. Functional D1R-H3R heteromers are expressed in 5-month-old**  
1731 **HdhQ7/Q7 and HdhQ7/Q111 mice.** Striatal (A, C) and cortical (B, D) organotypic  
1732 slice cultures from 5-month-old HdhQ7/Q7 and HdhQ7/Q111 mice were pre-treated for  
1733 60 min with vehicle, H3R antagonist thioperamide (10  $\mu$ M) or VUF5681 (10  $\mu$ M) (C  
1734 and D) or D1R antagonist SCH 23390 (10  $\mu$ M) (A and B) before the addition of SKF  
1735 81297 (50  $\mu$ M) and after 48h cell death was determined. Values represent mean  $\pm$  SEM  
1736 (n = 5 to 8) of percentage of cell death. One-way ANOVA followed by Bonferroni post  
1737 hoc tests showed a significant effect over vehicle treatment (\*\*p < 0.001) or over SKF  
1738 81297 treated slices (###p < 0.001).

1739

1740 **Figure S10. Schematic representation of pharmacological treatments and**  
1741 **behavioral analysis performed after chronic treatment with saline or**  
1742 **thioperamide.** Three intraperitoneal injections per week of saline (NaCl 0.9% saline) or  
1743 thioperamide (10 mg/Kg) were performed from 5-month-old to 8-month-old mice when  
1744 the animals were sacrificed and perfused. Behavioral assessment started at 6 months of  
1745 age with the evaluation of the ARTP, T-SAT, Open field and NORT. One cohort of  
1746 animals was sacrificed and perfused 30 min after the last injection to evaluate PLA at 6  
1747 months of age. A second cohort of animals was sacrifice and perfused 30 minutes after  
1748 the last injection to evaluate PLA at 8 months of age.

1749

1750

1751

1752

1753

1754

1755

1756 **Figure S11. No significant differences in the open field habituation were found**  
1757 **between treatments and genotypes.** Motivation and anxiety differences between  
1758 genotypes and treatments were analyzed by measuring the percentage of distance (**A**  
1759 and **E**), the percentage of entries (**B** and **F**) and the percentage of time (**C** and **G**)  
1760 between the periphery and the center in the open field arena at the first (**A**, **B** and **C**) or  
1761 second (**E**, **F** and **G**) day of habituation in the open field arena. The spontaneous  
1762 locomotor activity differences between genotypes and treatments were analyzed by  
1763 measuring the total distance rove for each animal at first (**D**) or second (**H**) day of  
1764 habituation in the open field arena. After two days of habituation in the open field arena,  
1765 all mice behave equal. Data represents mean  $\pm$  SEM. Statistical analysis was performed  
1766 using one-way ANOVA with Bonferroni *post hoc* comparisons; \* $p < 0.05$ , \*\*\* $p < 0.001$   
1767 compared to the periphery.

1768

1769

1770

1771

1772

1773

1774

1775

1776

1777

1778

1779

1780

1781

1782

1783 **Figure S12. Training session in the T-SAT showed similar number of arm entries**

1784 **in all genotypes and treatments.** 6-month-old Hdh<sup>Q7/Q7</sup> and Hdh<sup>Q7/Q111</sup> mice following

1785 the injection protocol in S8 showed no differences in spontaneous locomotor activity or

1786 anxiogenic components in training sessions of the T-maze. 11 saline-treated Hdh<sup>Q7/Q7</sup>

1787 mice, 10 thioperamide-treated Hdh<sup>Q7/Q7</sup> mice, 7 saline-treated Hdh<sup>Q7/Q111</sup> mice and 9

1788 thioperamide-treated Hdh<sup>Q7/Q111</sup> mice were evaluated. Data represents mean ± SEM.

1789

1790

1791 **Figure S13. Expression of D<sub>1</sub>R-H<sub>3</sub>R heteromers in 8-month-old Hdh<sup>Q7/Q7</sup> and**

1792 **Hdh<sup>Q7/Q111</sup> mice chronically treated with thioperamide.** In (A), Proximity Ligation

1793 Assays (PLA), were performed in striatal, cortical and hippocampal slices. D<sub>1</sub>R-H<sub>3</sub>R

1794 heteromers were visualized as green spots around blue colored DAPI stained nucleus in

1795 8-month-old Hdh<sup>Q7/Q7</sup> and Hdh<sup>Q7/Q111</sup> mice chronically treated with thioperamide. Scale

1796 bar: 20 μm. In (B), the number of cells containing one or more green spots is expressed

1797 as the percentage of the total number of cells (blue nucleus). *r values* (number of green

1798 spots/cell containing spots) are shown above each bar. Data (% of positive cells or *r*) are

1799 the mean ± SEM of counts in 600-800 cells from 4-8 different fields from 3 different

1800 animals. Student's *t* test showed no significant differences in D<sub>1</sub>R-H<sub>3</sub>R heteromer

1801 expression in thioperamide-treated Hdh<sup>Q7/Q111</sup> mice compared to the respective Hdh<sup>Q7/Q7</sup>

1802 mice.

1803 **Figure S14. Biochemical and Pathological Effects of Thioperamide treatment.** In  
1804 (A), representative images showing spinophilin-immunoreactive puncta in the *stratum*  
1805 *oriens* of CA1 hippocampus and in layer I of motor cortex area 1 (M1) of saline and  
1806 thioperamide-treated WT Hdh<sup>Q7/Q7</sup> and knock-in Hdh<sup>Q7/Q111</sup> mice at 6 months of age.  
1807 Quantitative analysis of the mean size of spinophilin-immunoreactive puncta in the  
1808 *stratum radiatum* and *stratum oriens* of CA1 hippocampus and in layers I, II-III and V  
1809 of motor cortex area 1 (M1) are shown as mean ± SEM (n= 9 images from three  
1810 animals/group). Statistical analysis was performed using Student's two-tailed t test. No  
1811 significant differences were found. Scale bar: 5 µm. In (B), Representative Western  
1812 blots of total striatal, hippocampal and cortical extracts from 6-month-old saline and  
1813 thioperamide-treated knock-in Hdh<sup>Q7/Q111</sup> mice. The blots were probed with 1C2  
1814 antibody for mutant huntingtin (mHtt). In samples from both saline and thioperamide-  
1815 treated Hdh<sup>Q7/Q111</sup> mice insoluble oligomeric forms of mHtt were detected in the  
1816 stacking gel and soluble forms were detected in the running gel.

1817

1818

1819 **Figure S15. D<sub>1</sub>R-H<sub>3</sub>R heteromer are not expressed in HD R6/1 and R6/2 mouse**  
1820 **models.** Proximity Ligation Assays (PLA) were performed using striatal or cortical  
1821 slices from age matched wild type littermates (WT) and 4-month-old R6/1 (A) or 8-  
1822 week-old R6/2 mice (B). D<sub>1</sub>R-H<sub>3</sub>R heteromers were visualized only in wild-type mouse  
1823 slices as green spots around blue colored DAPI stained nucleus. Scale bar: 20 µm.

1824



STHdH<sup>Q7</sup>STHdH<sup>Q111</sup>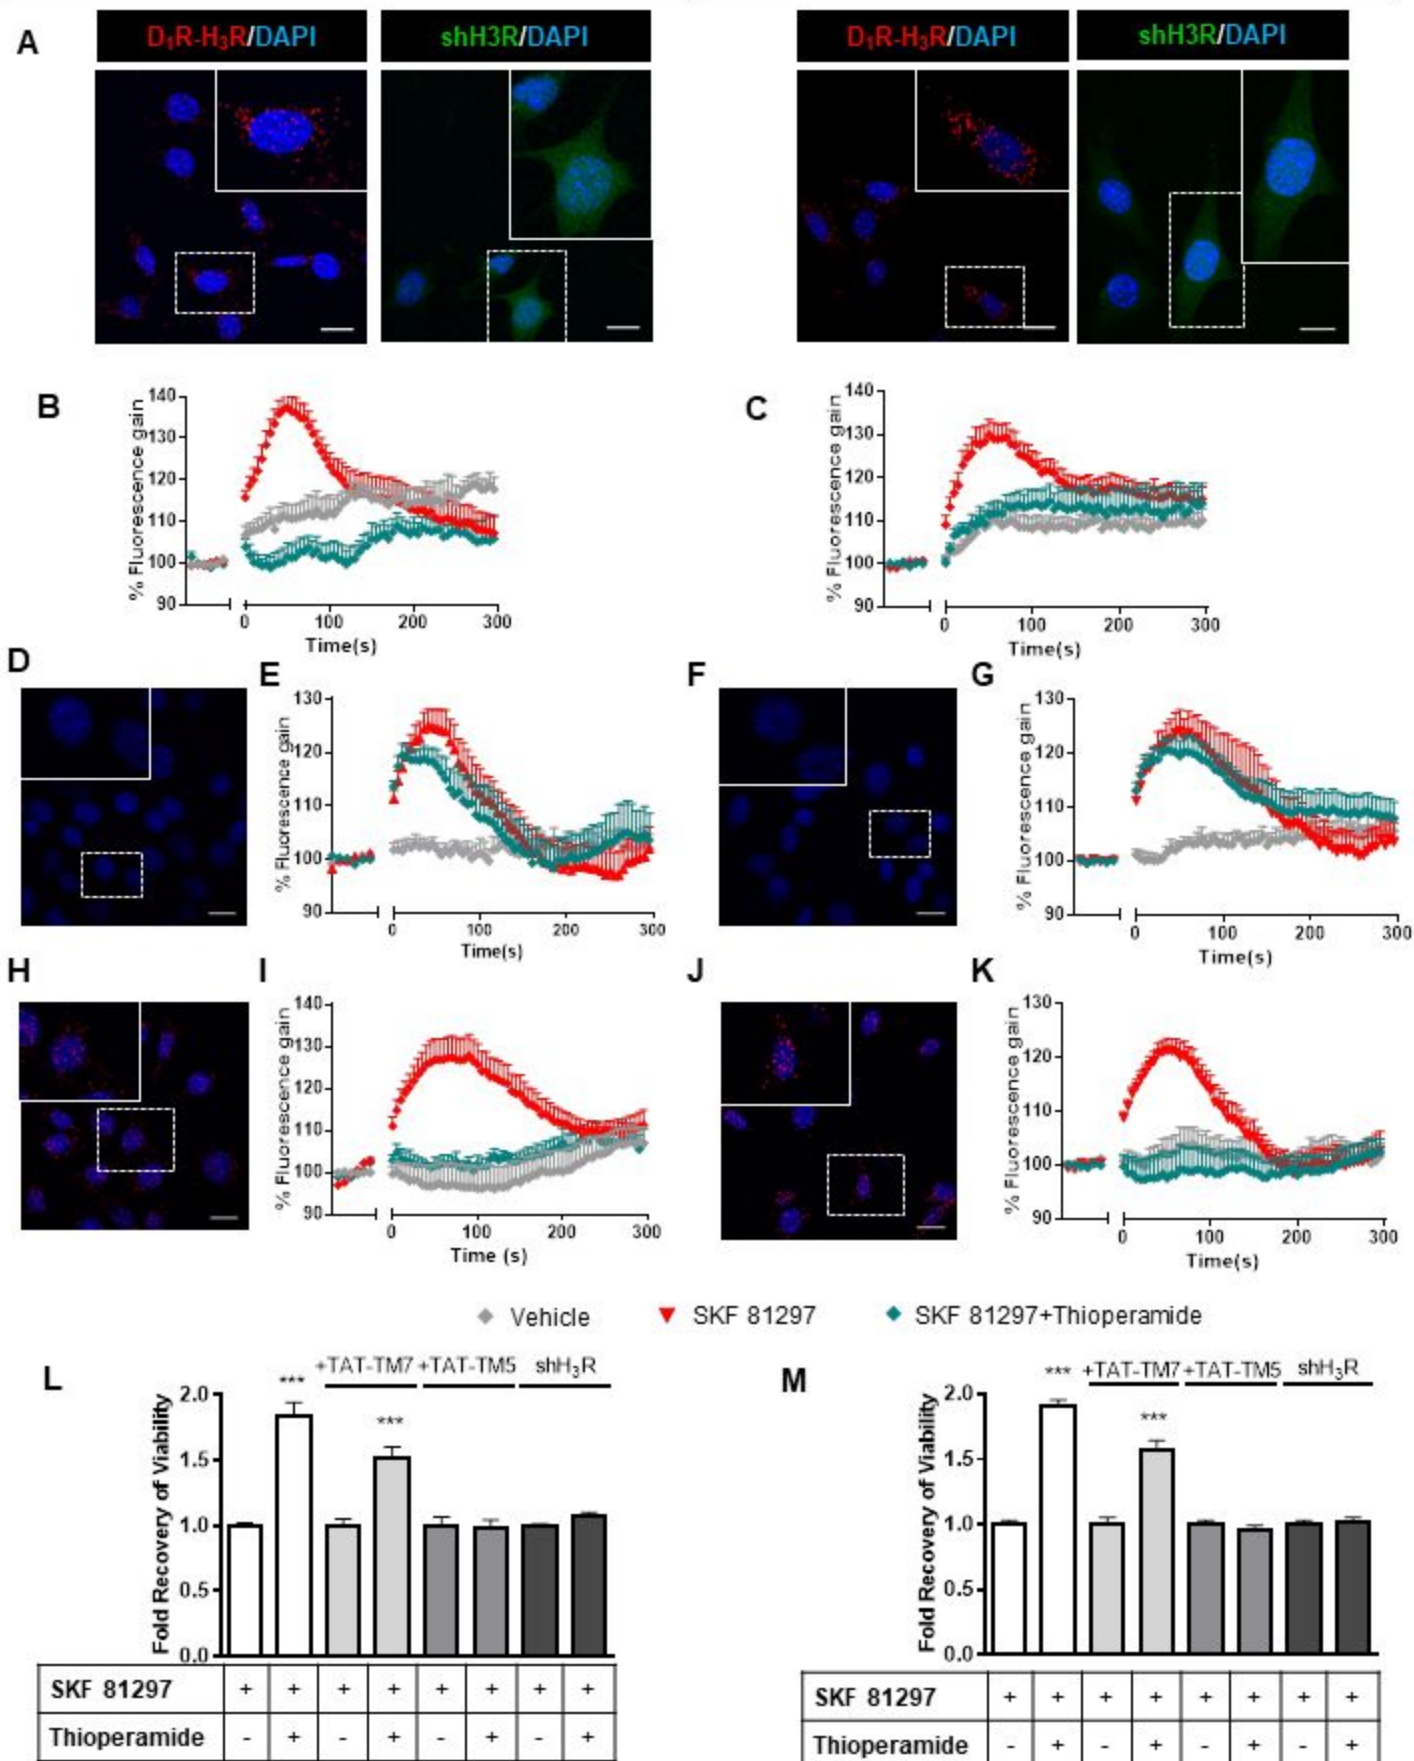

Figure 1



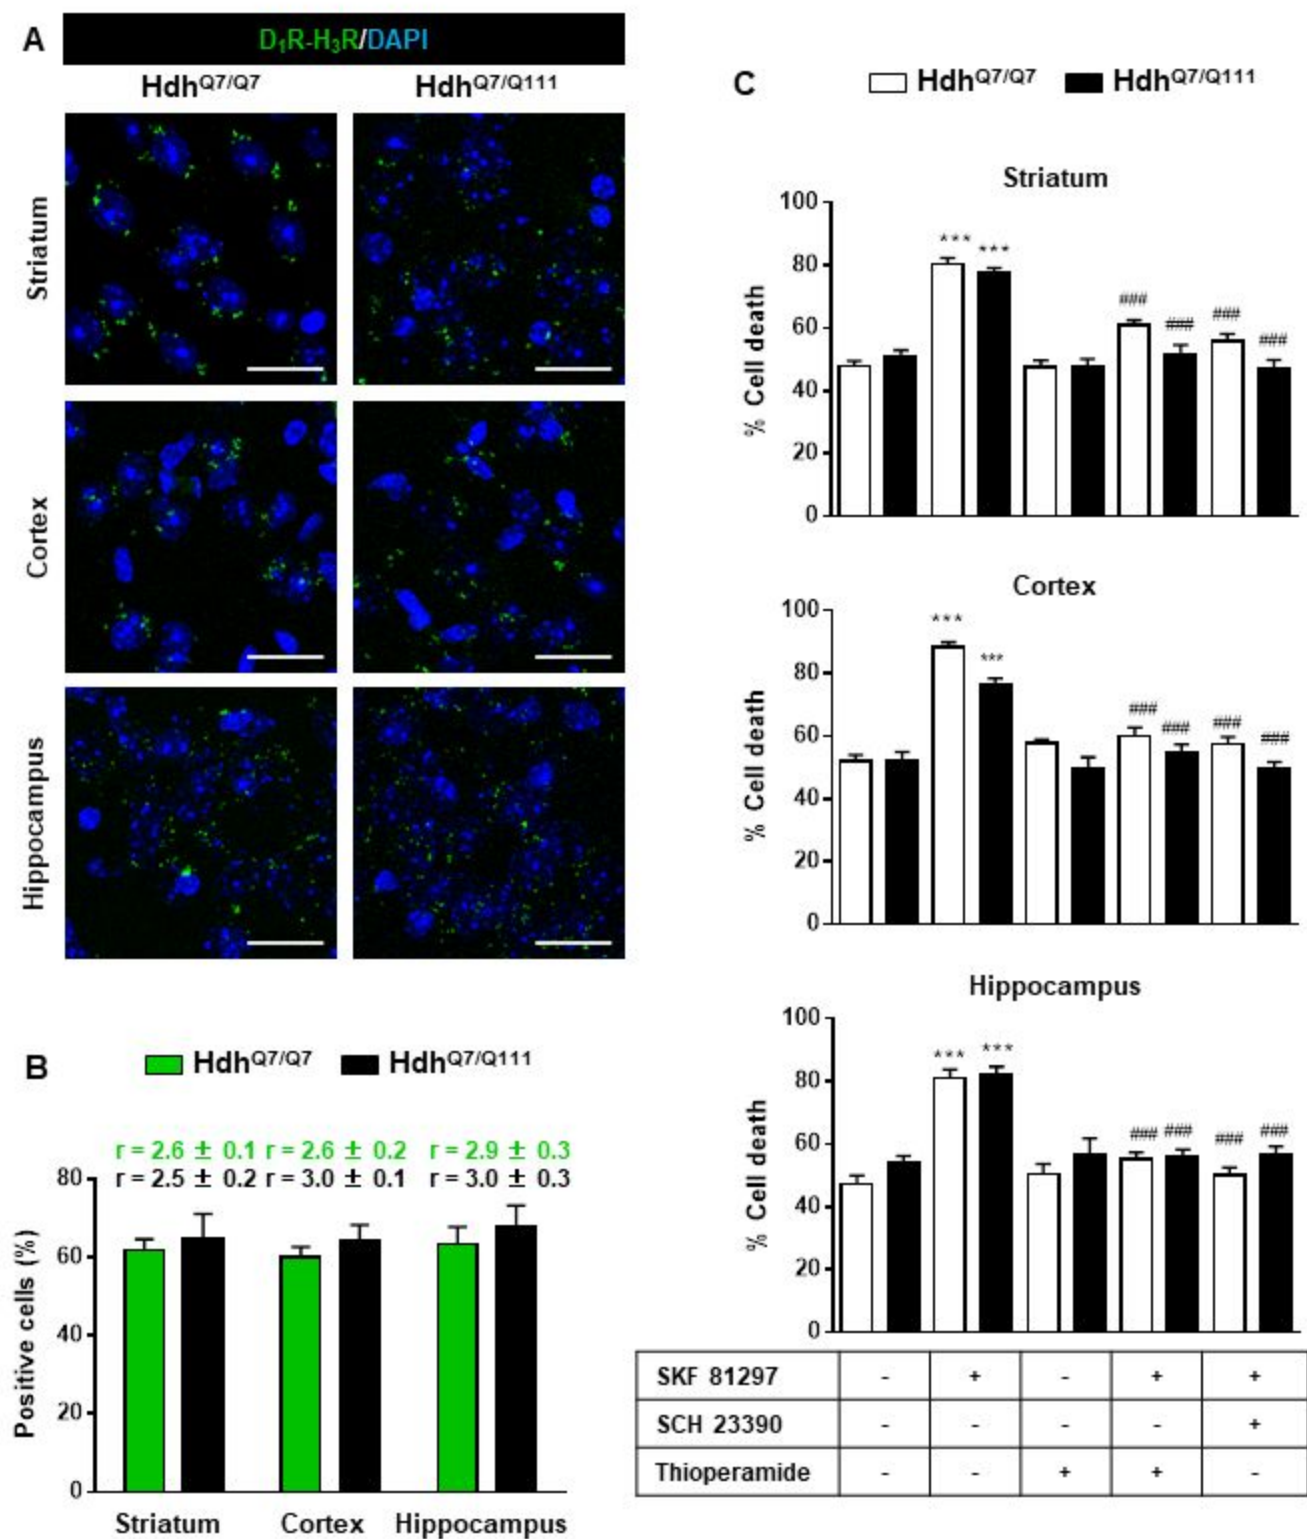

Figure 2

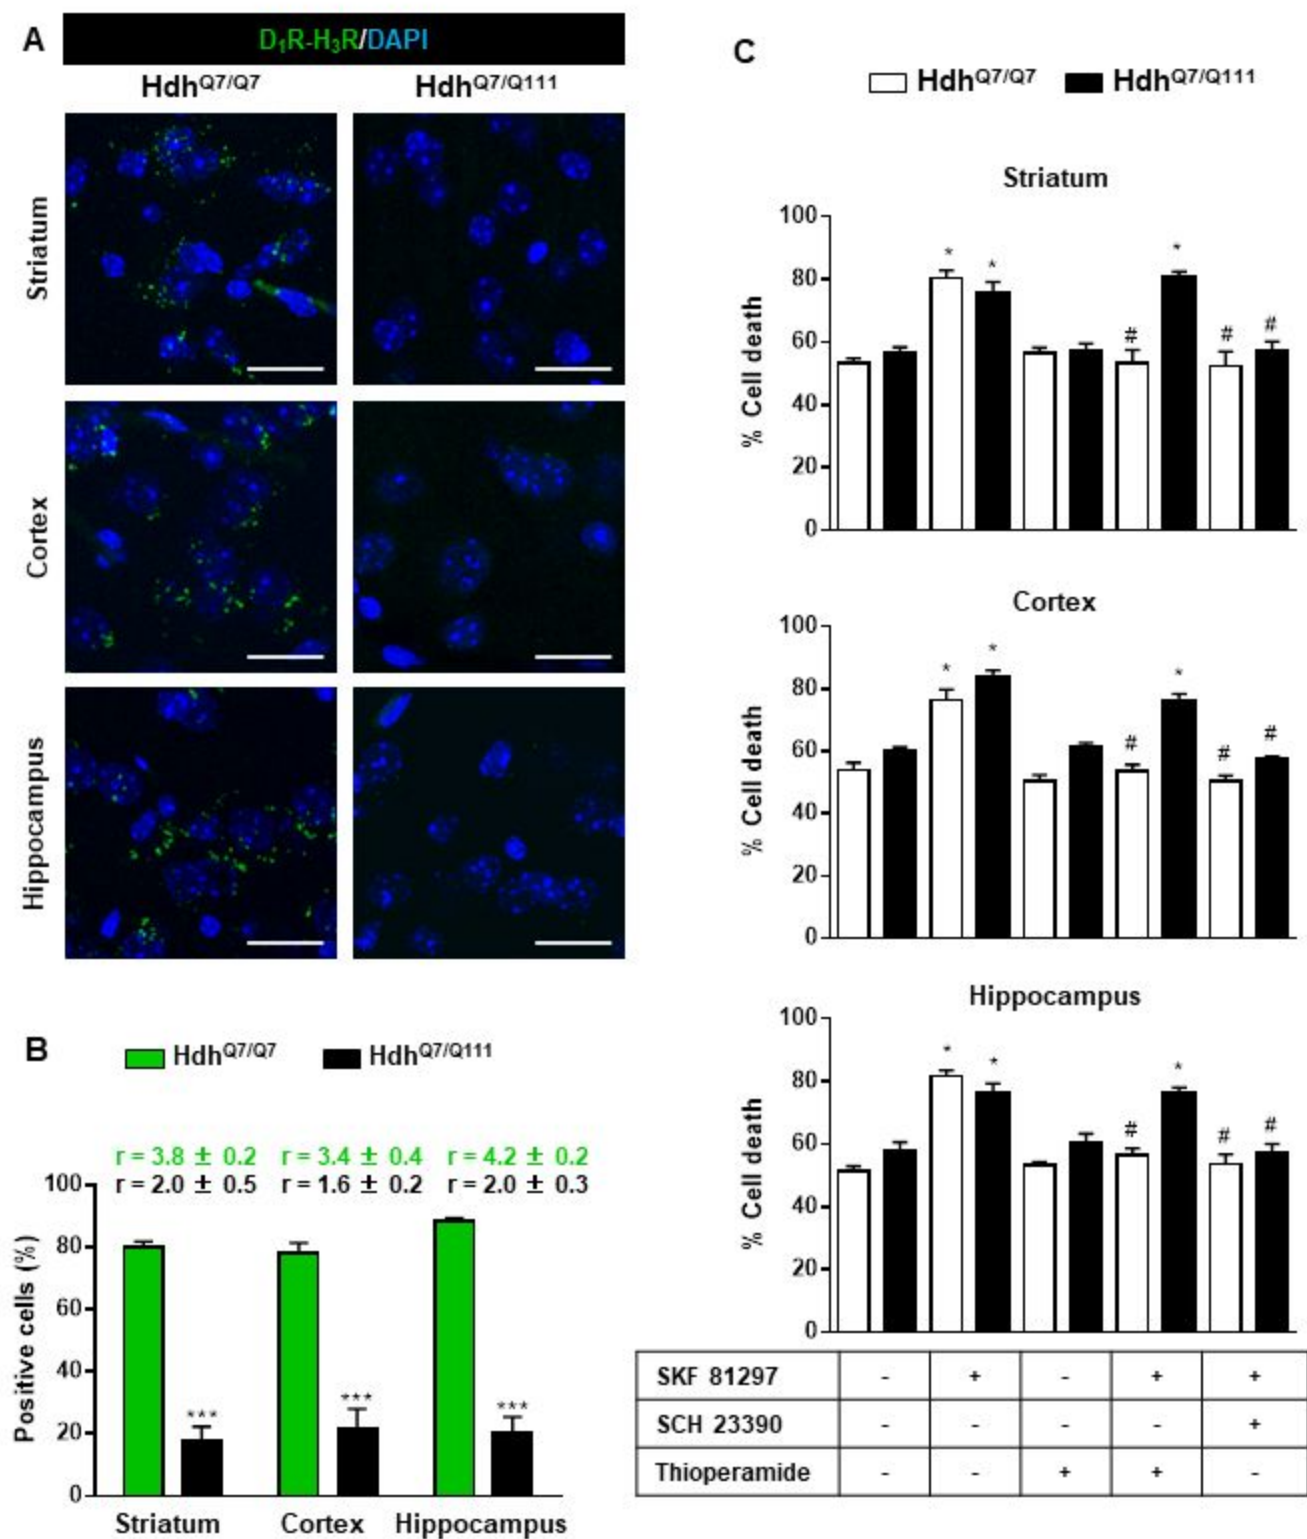

Figure 3

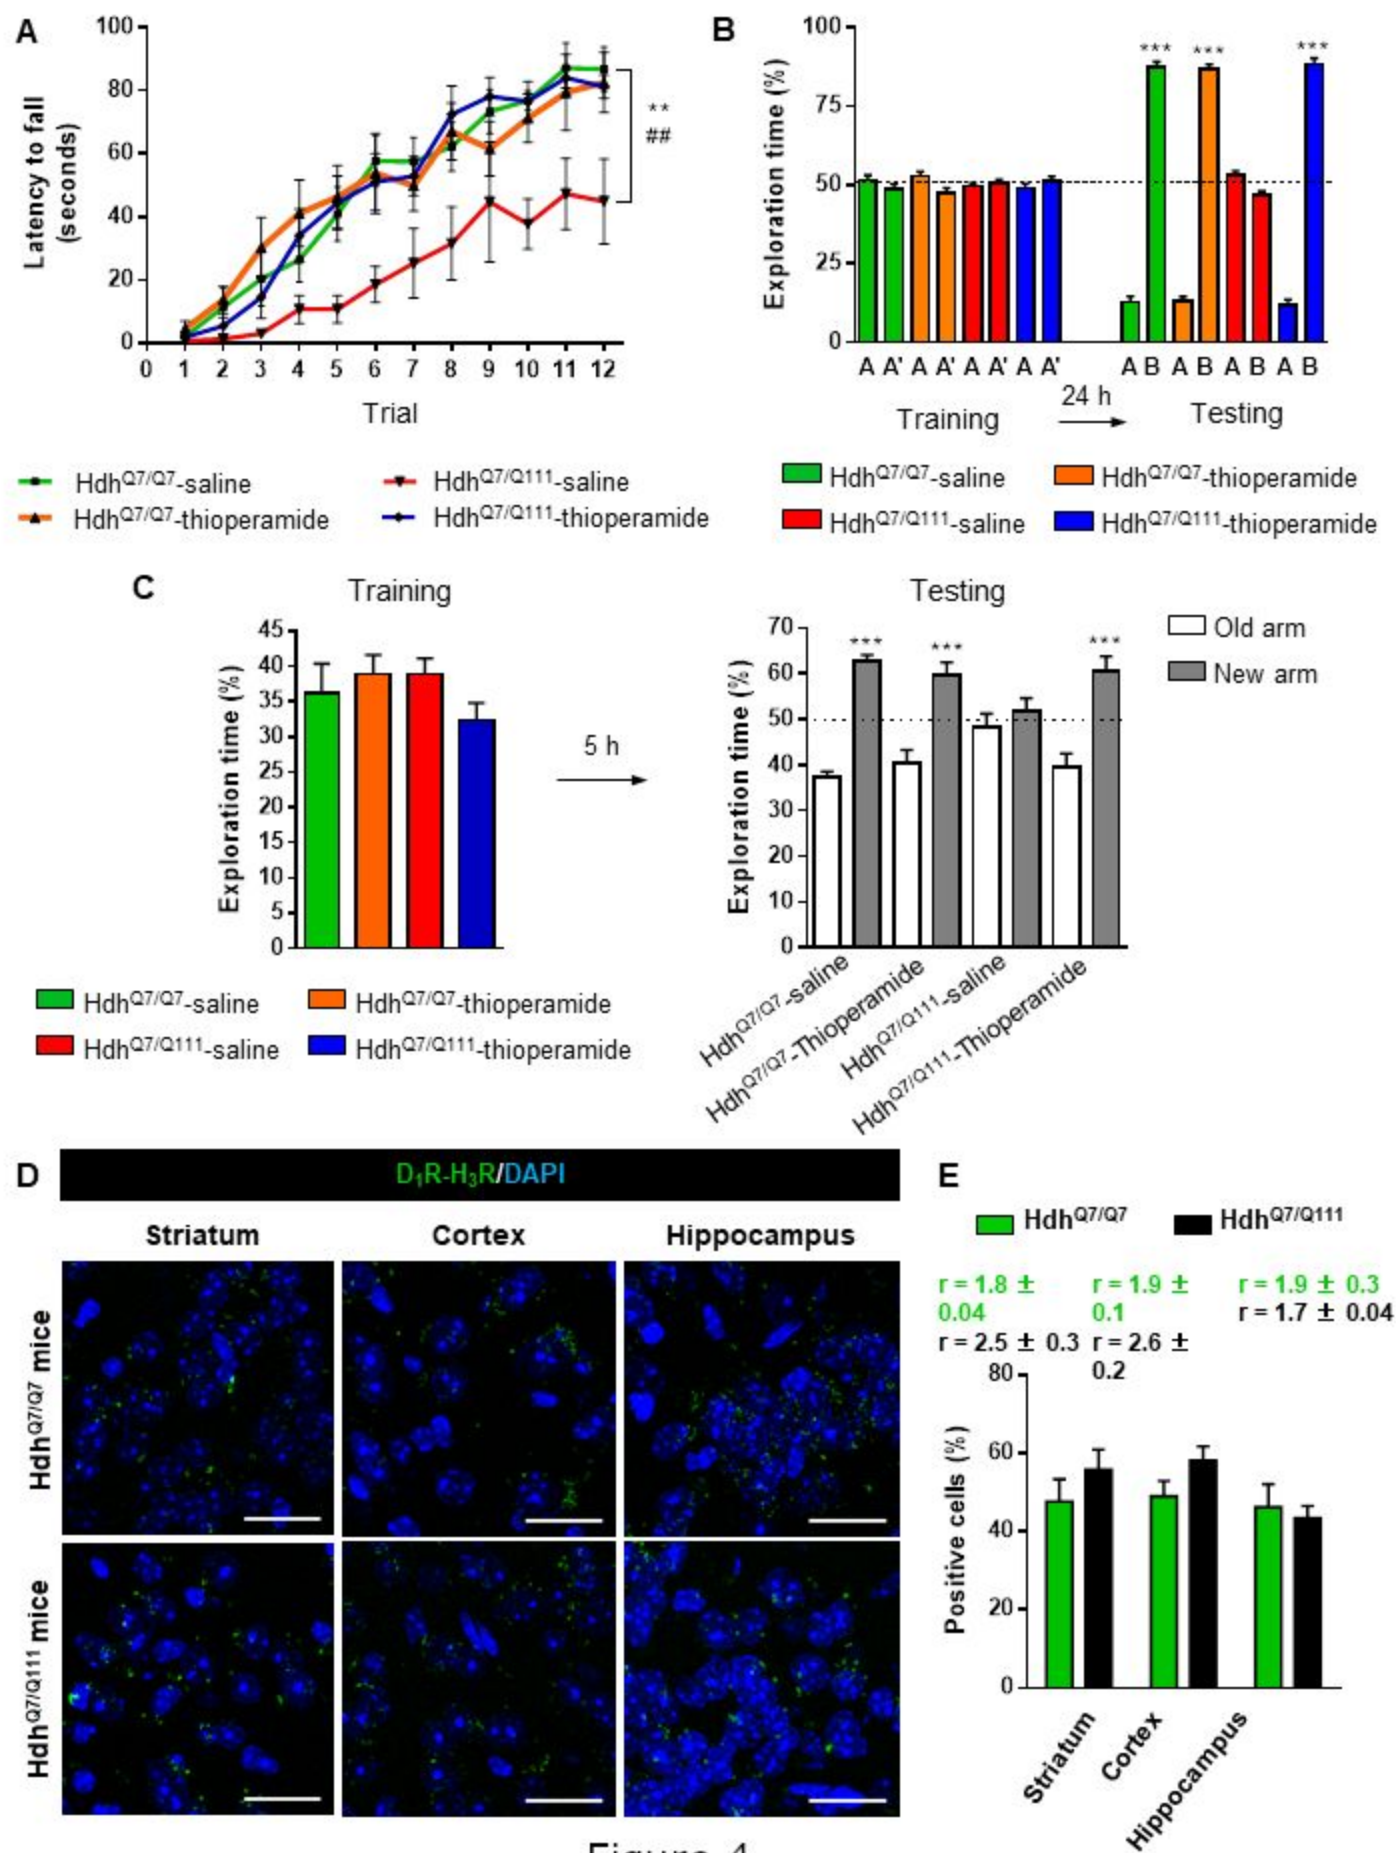

Figure 4

A

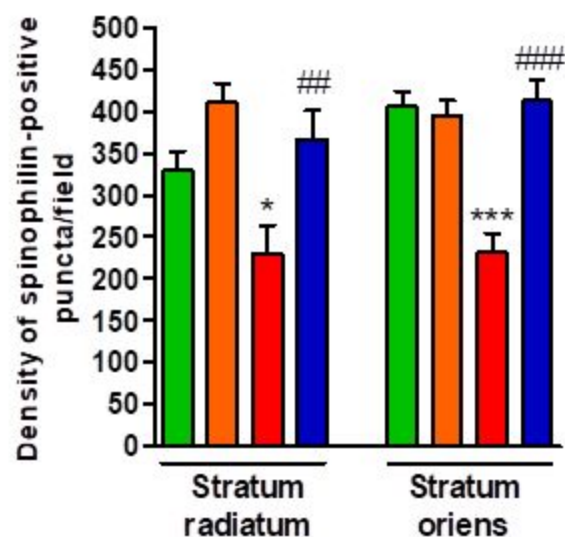

B

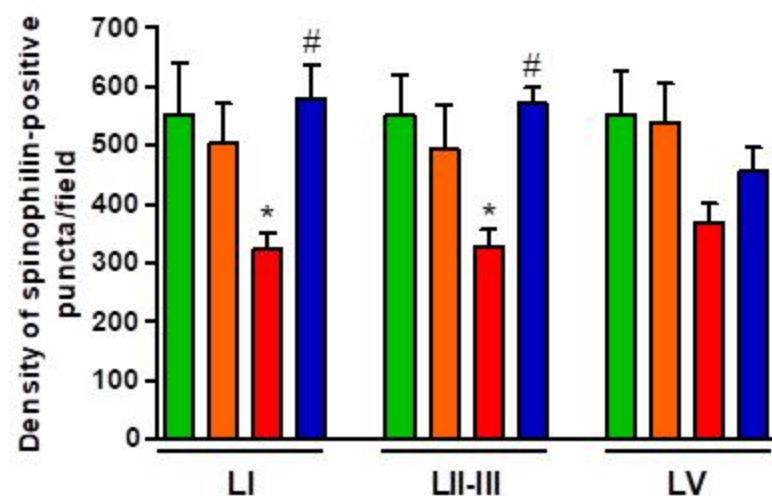

C

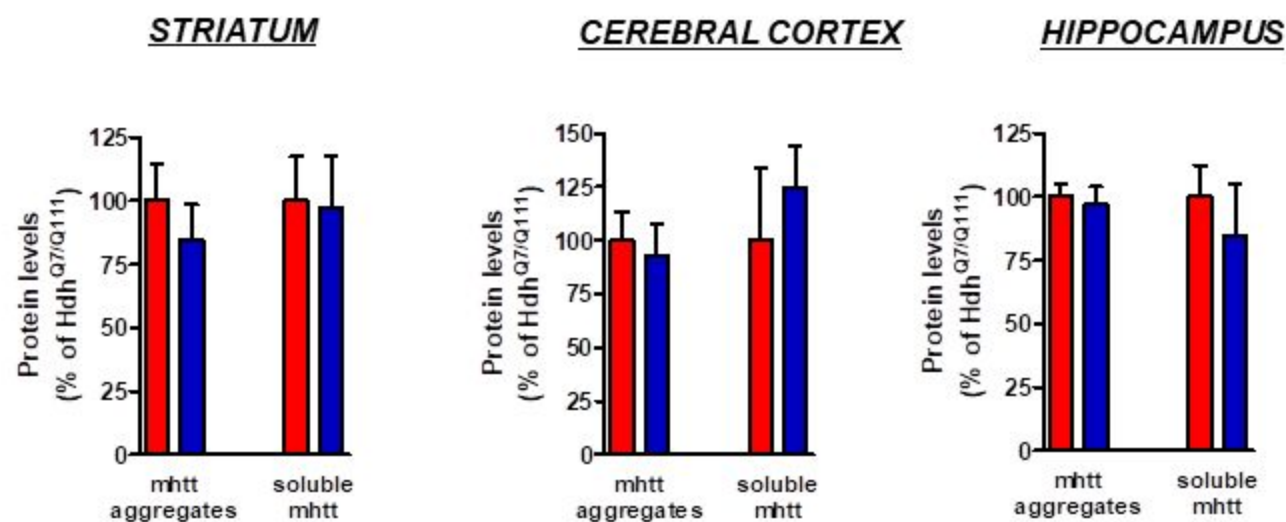

Figure 5

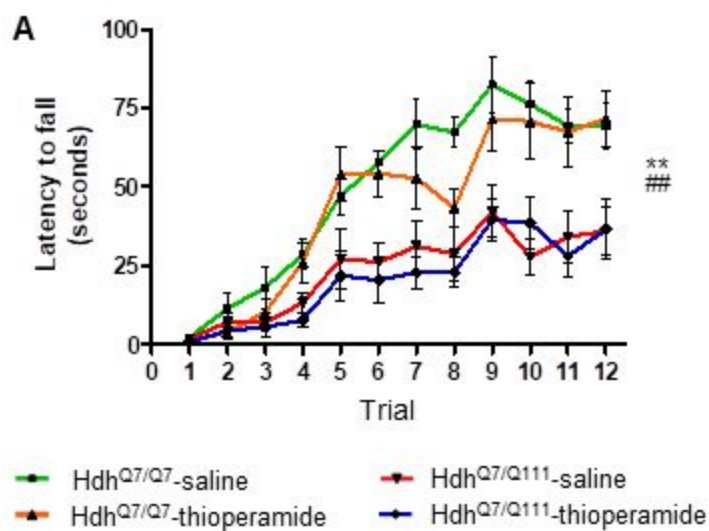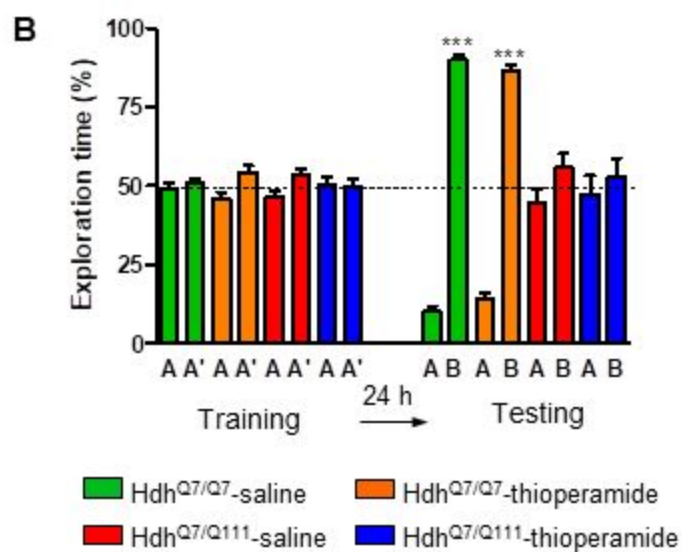

Figure 6

A

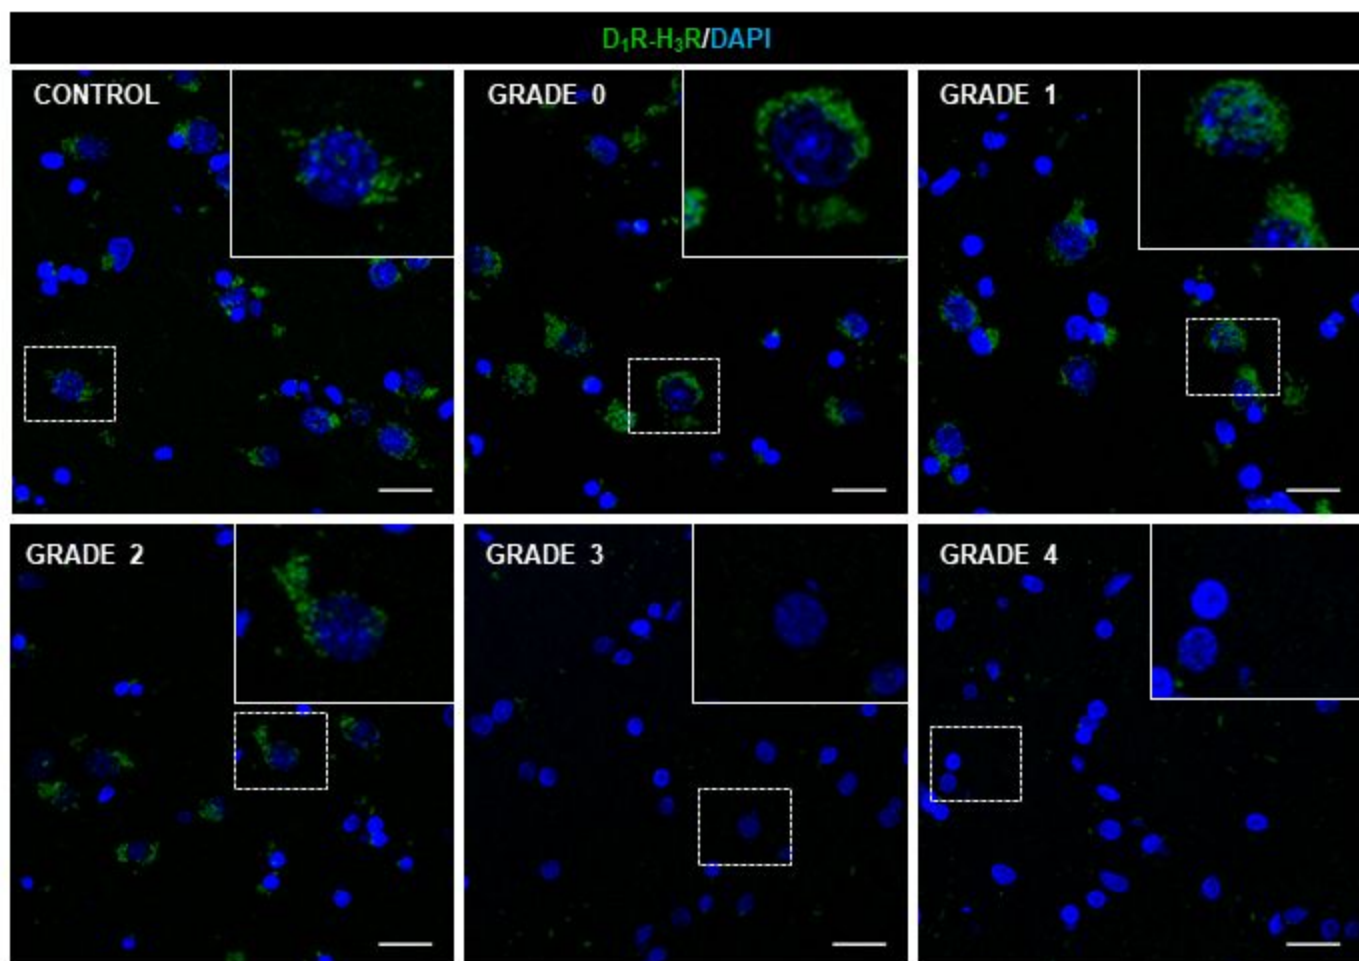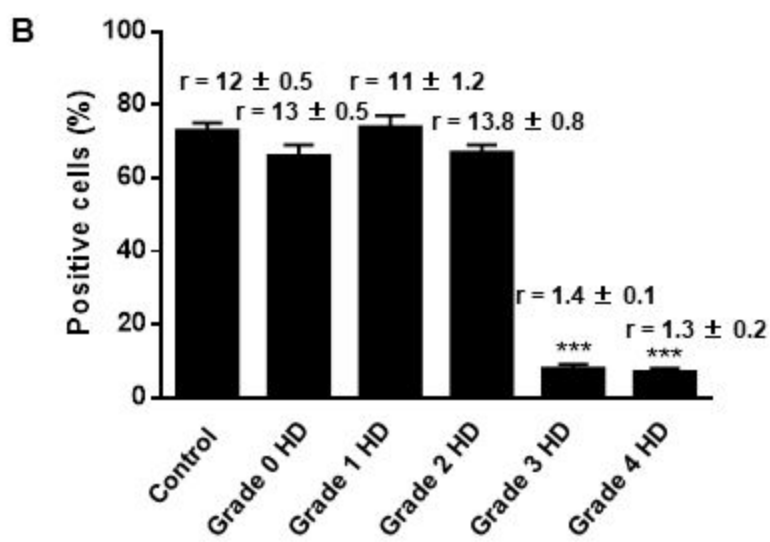

Figure 7

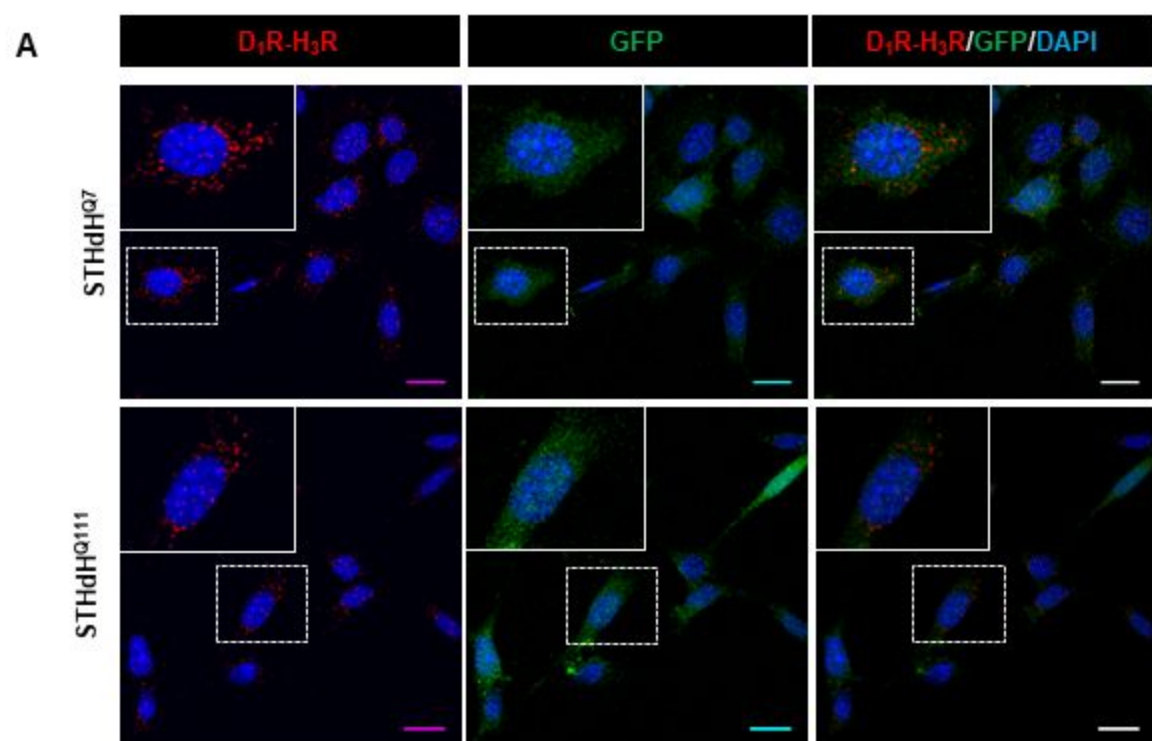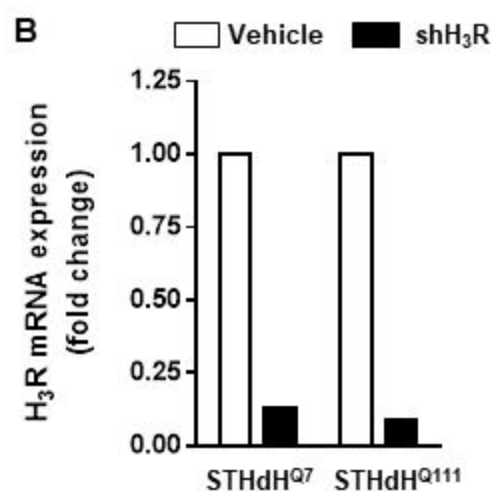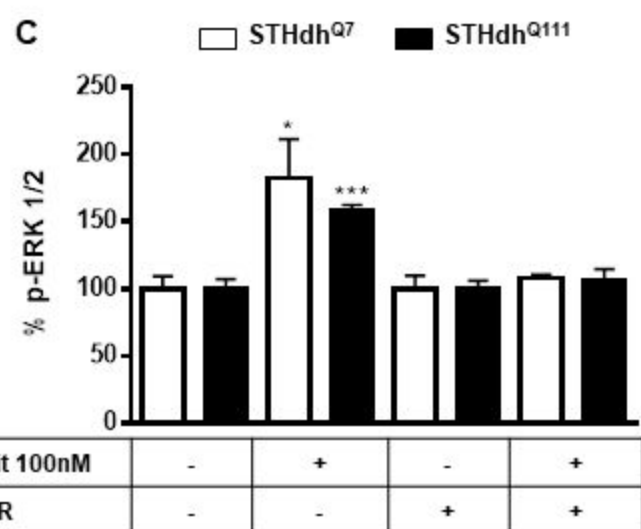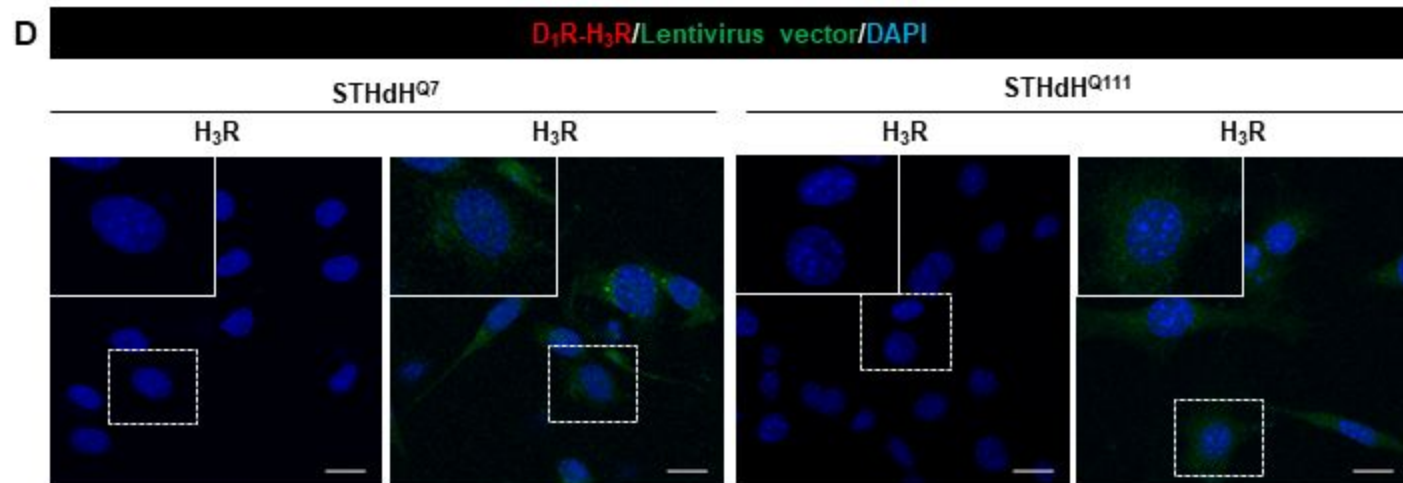

SUPPLEMENTARY FIGURE 1

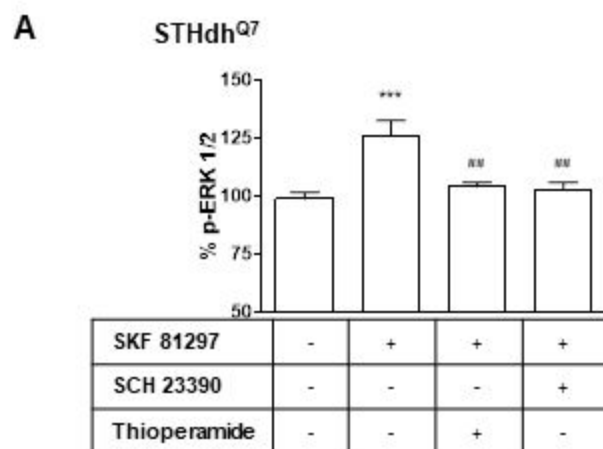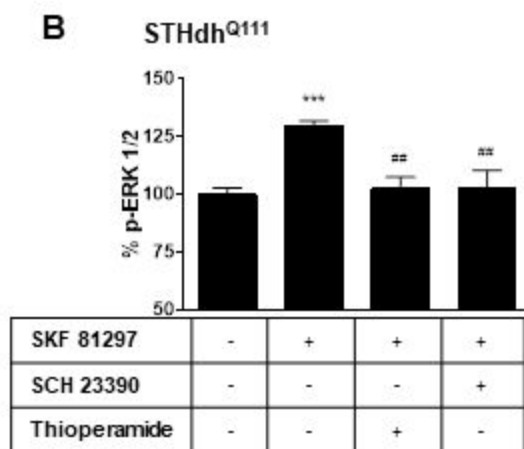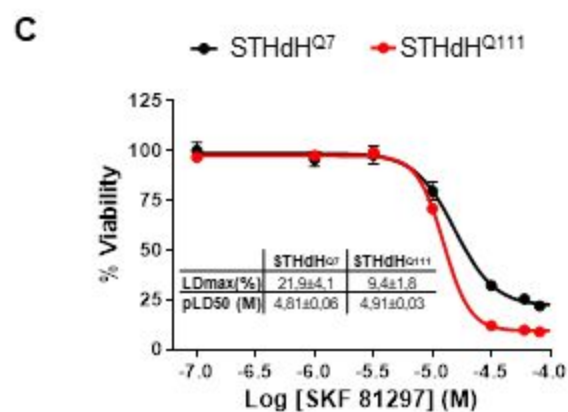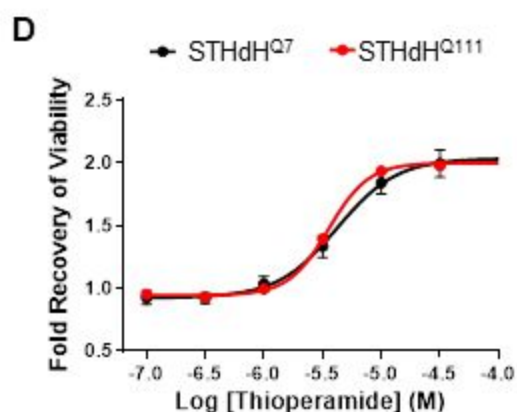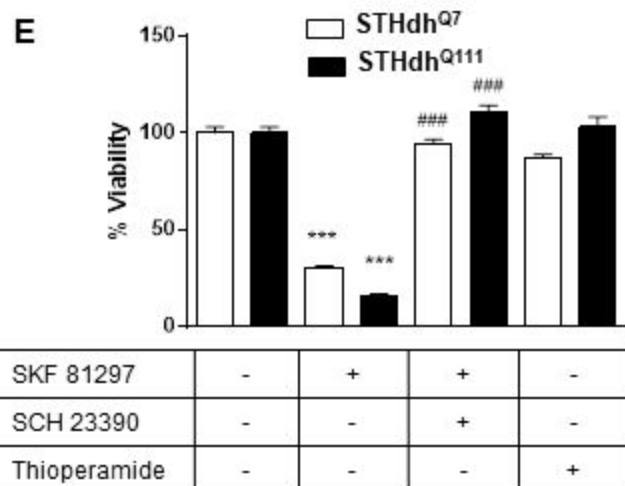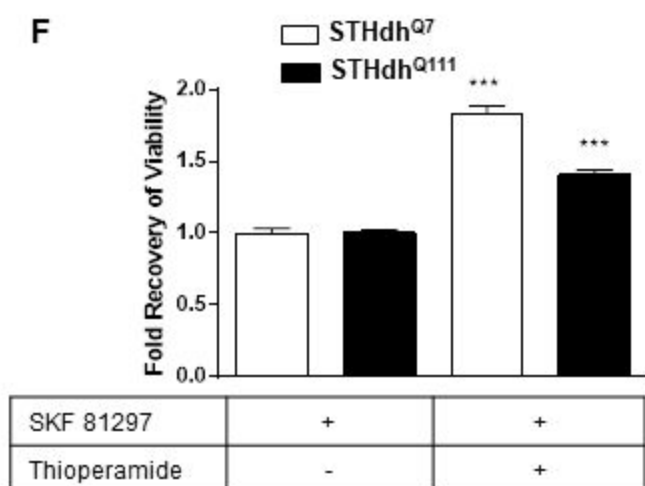



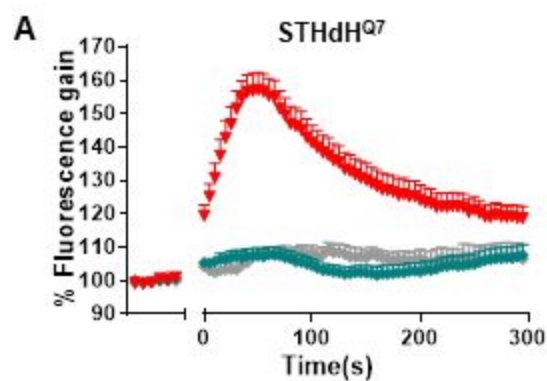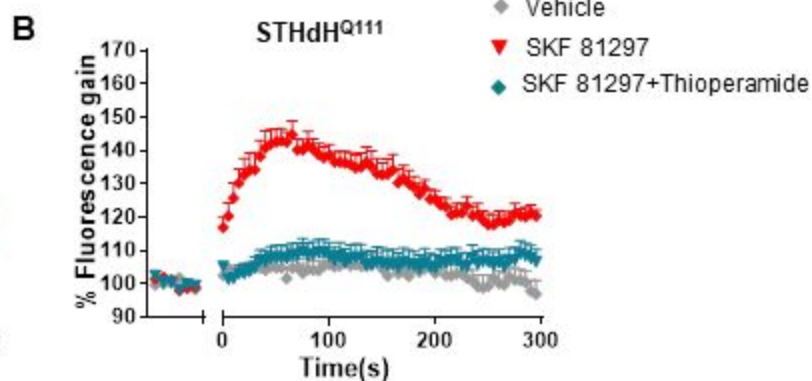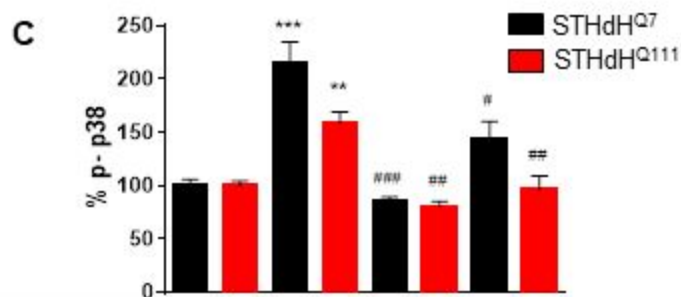

|              |   |   |   |   |   |   |   |
|--------------|---|---|---|---|---|---|---|
| SKF 81297    | - | - | + | + | + | + | + |
| SB 203580    | - | - | - | - | + | + | - |
| Thioperamide | - | - | - | - | - | - | + |

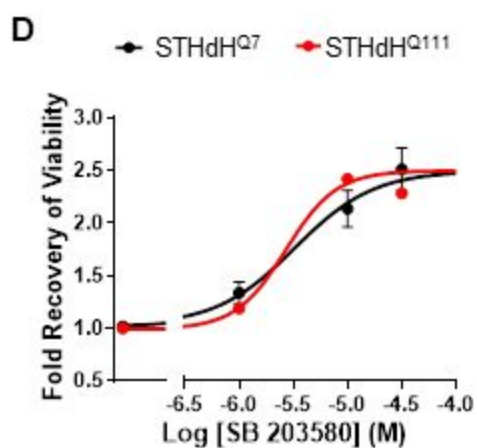

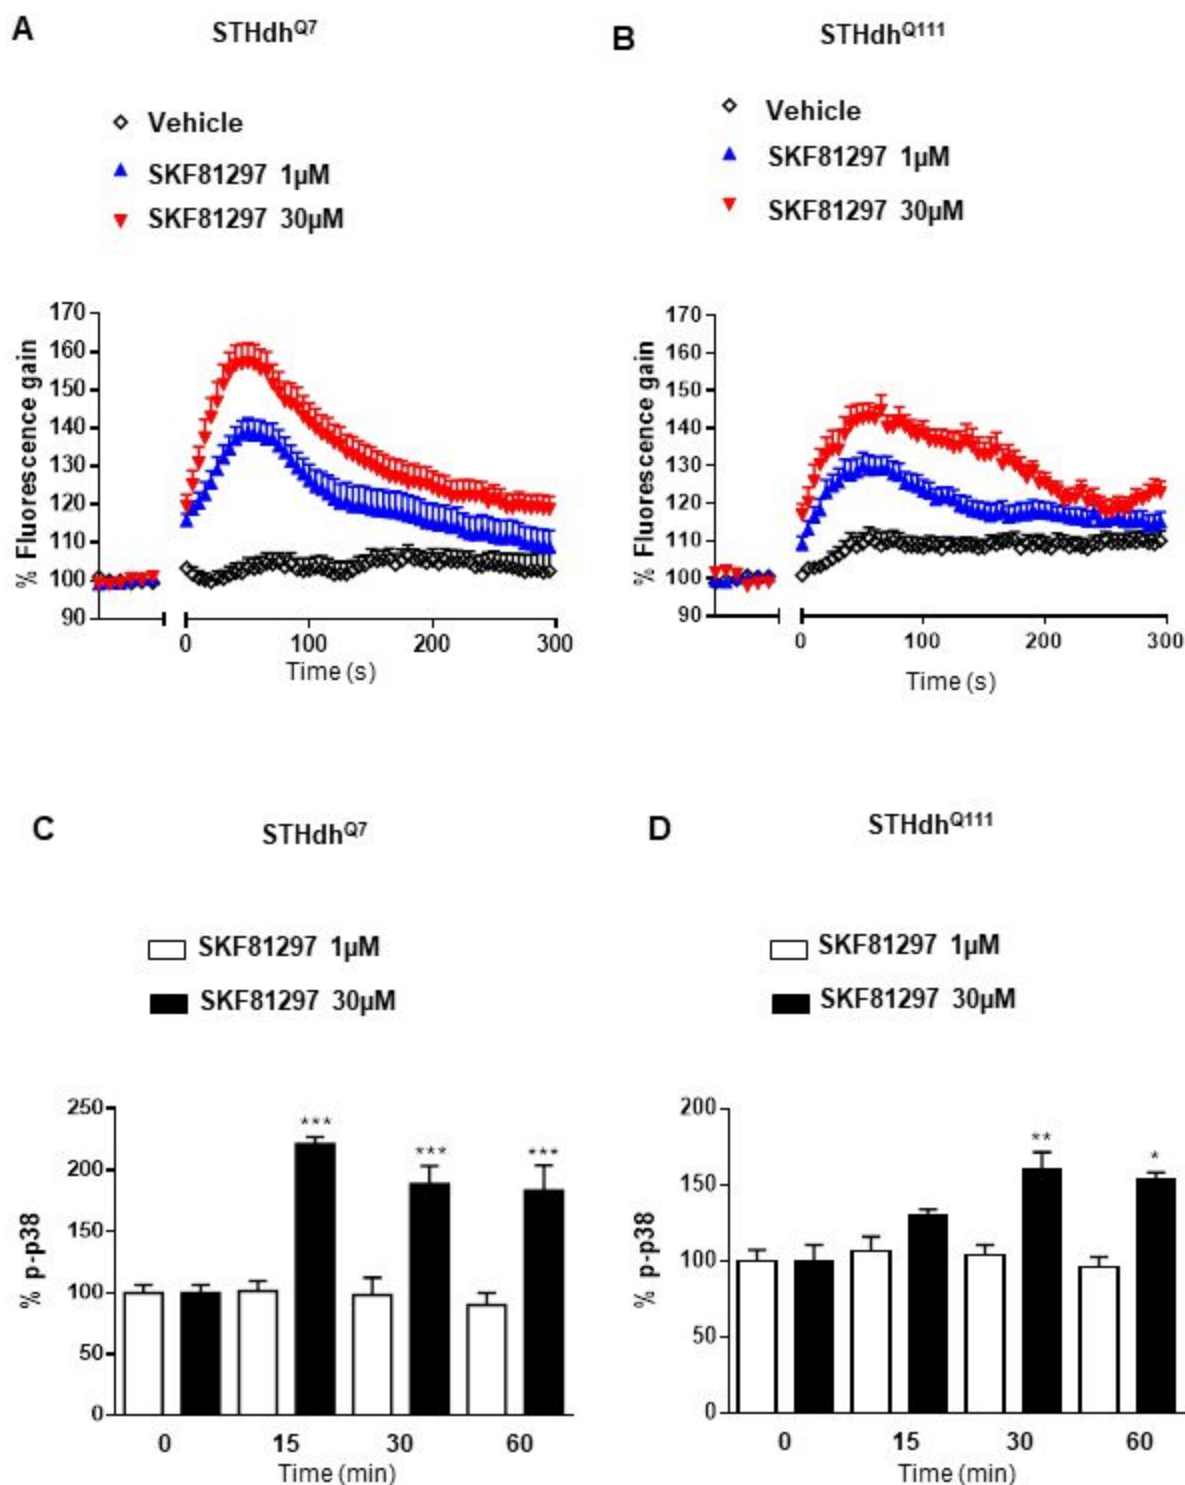

SUPPLEMENTARY FIGURE 4

**A**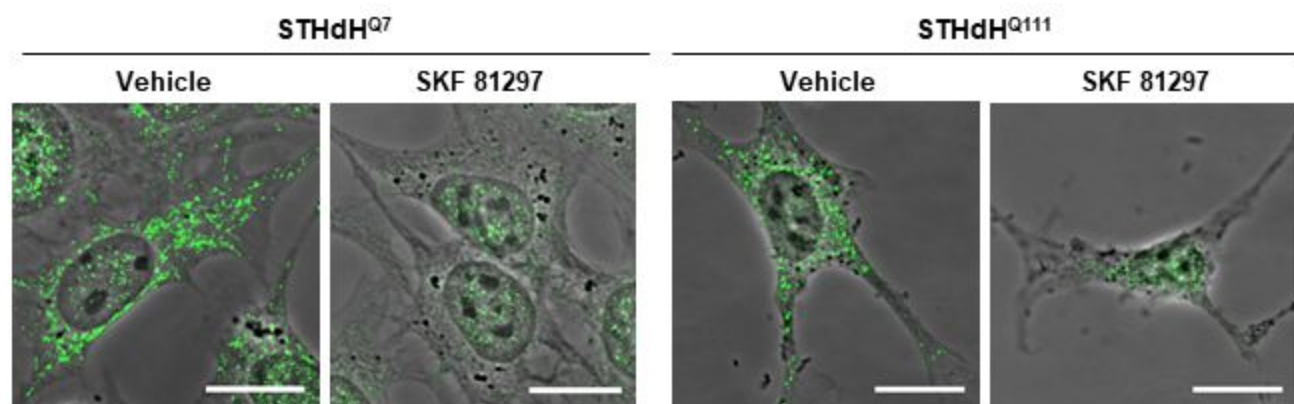**B**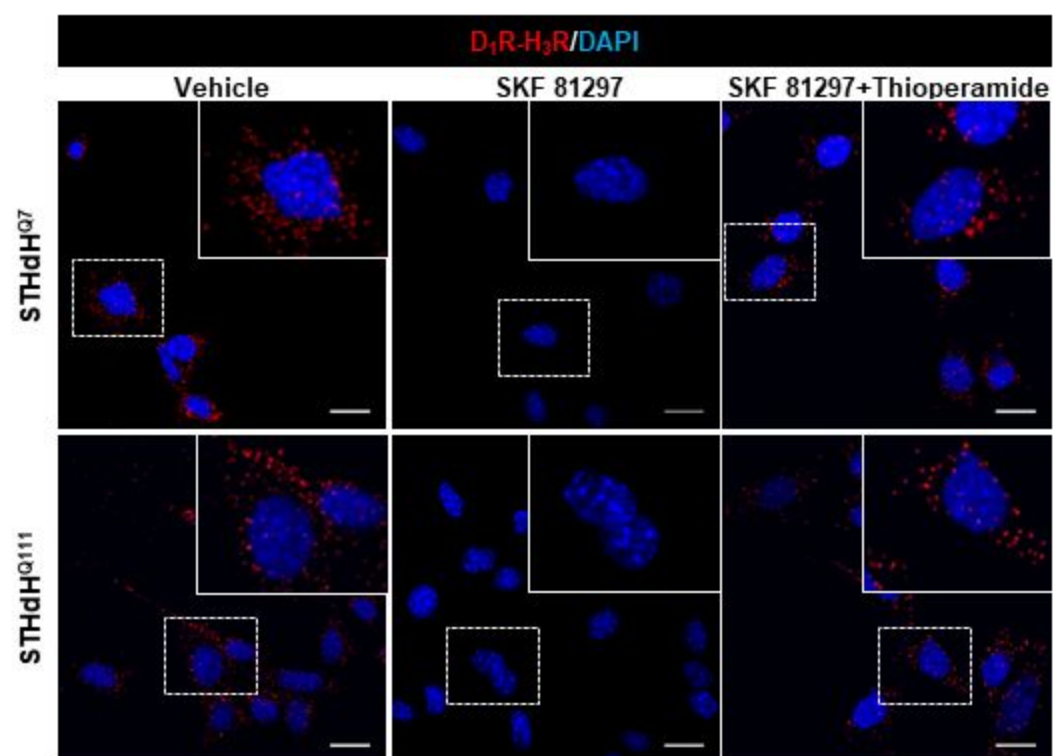

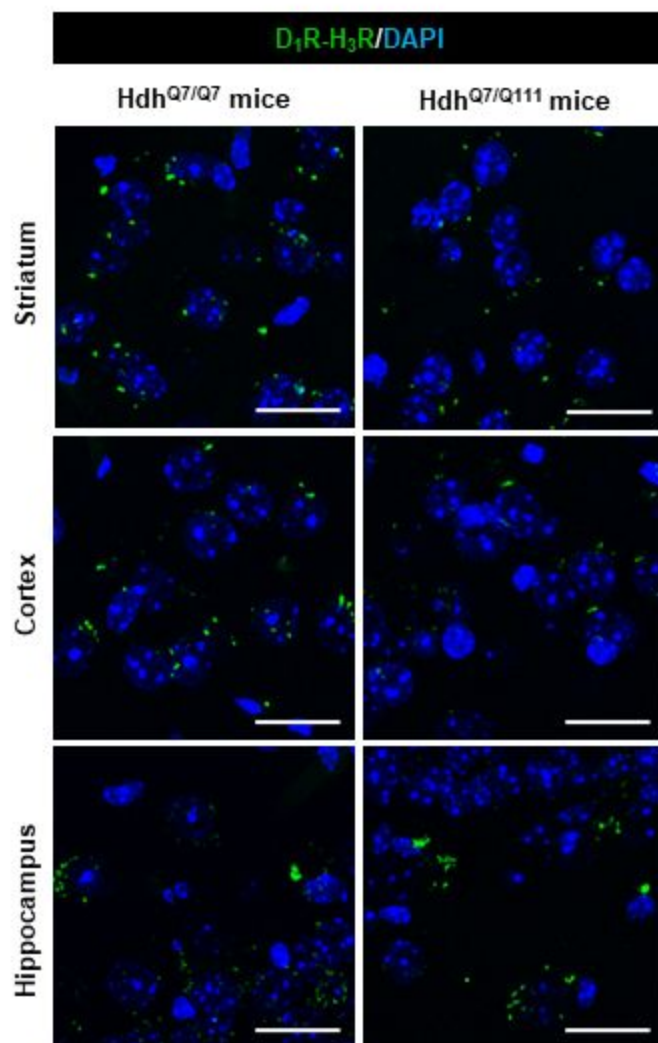

SUPPLEMENTARY FIGURE 6

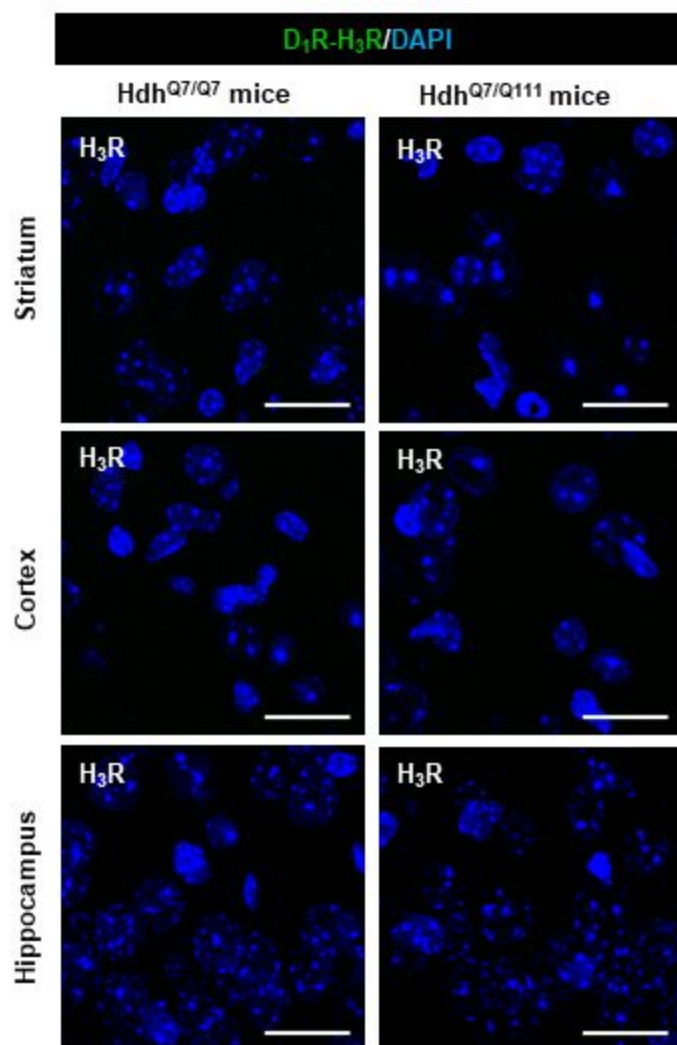

SUPPLEMENTARY FIGURE 7

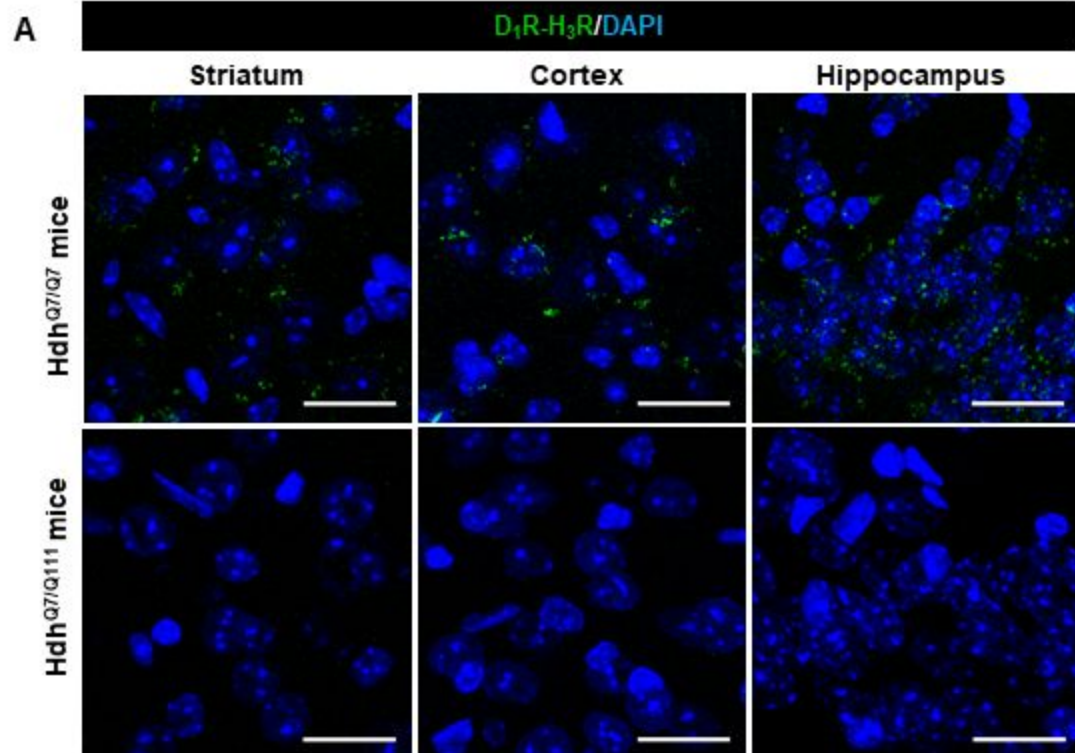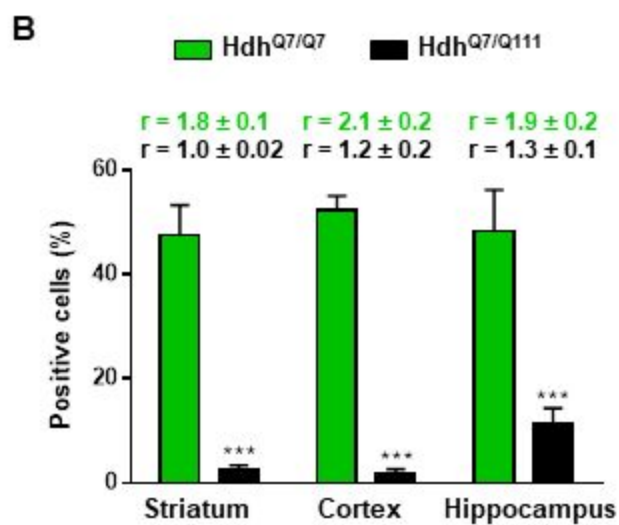

**A**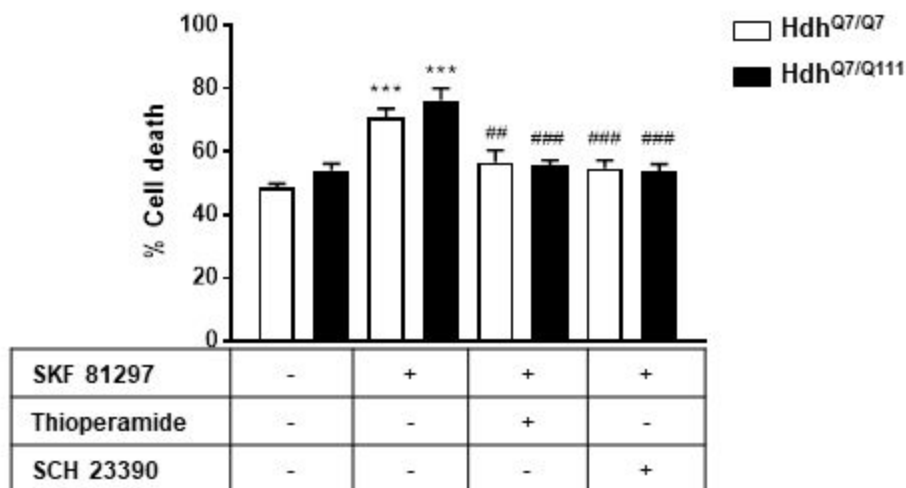**B**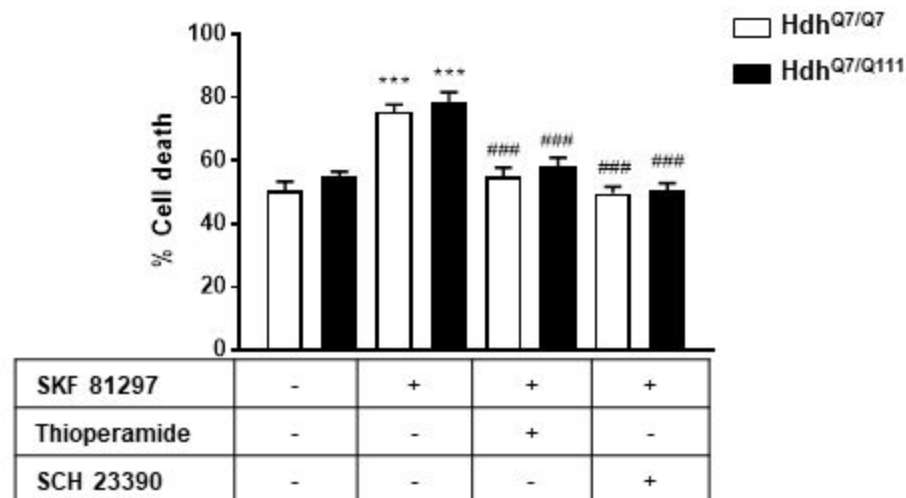

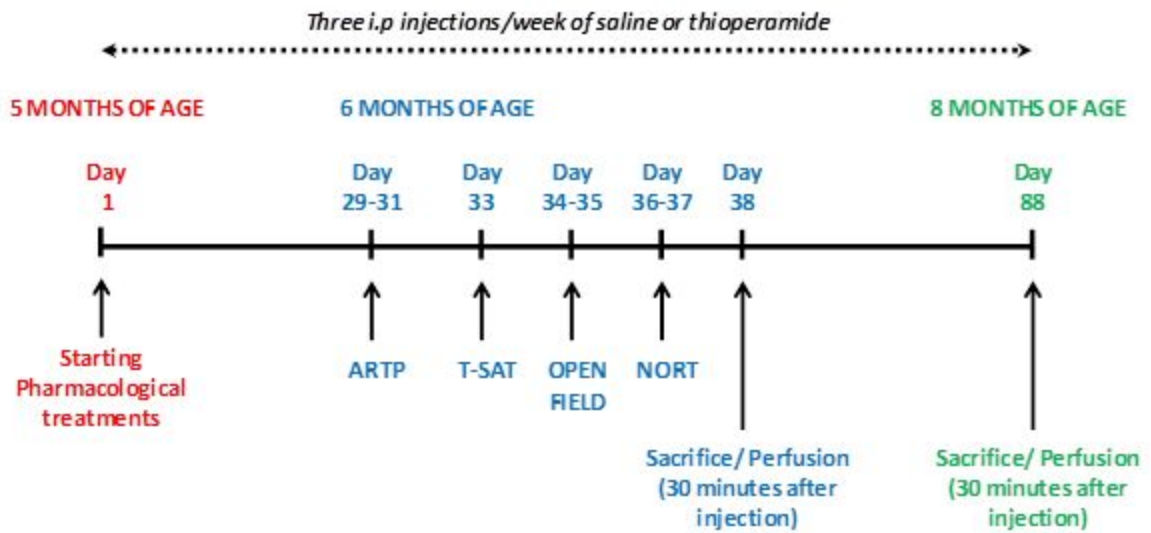

SUPPLEMENTARY FIGURE 10



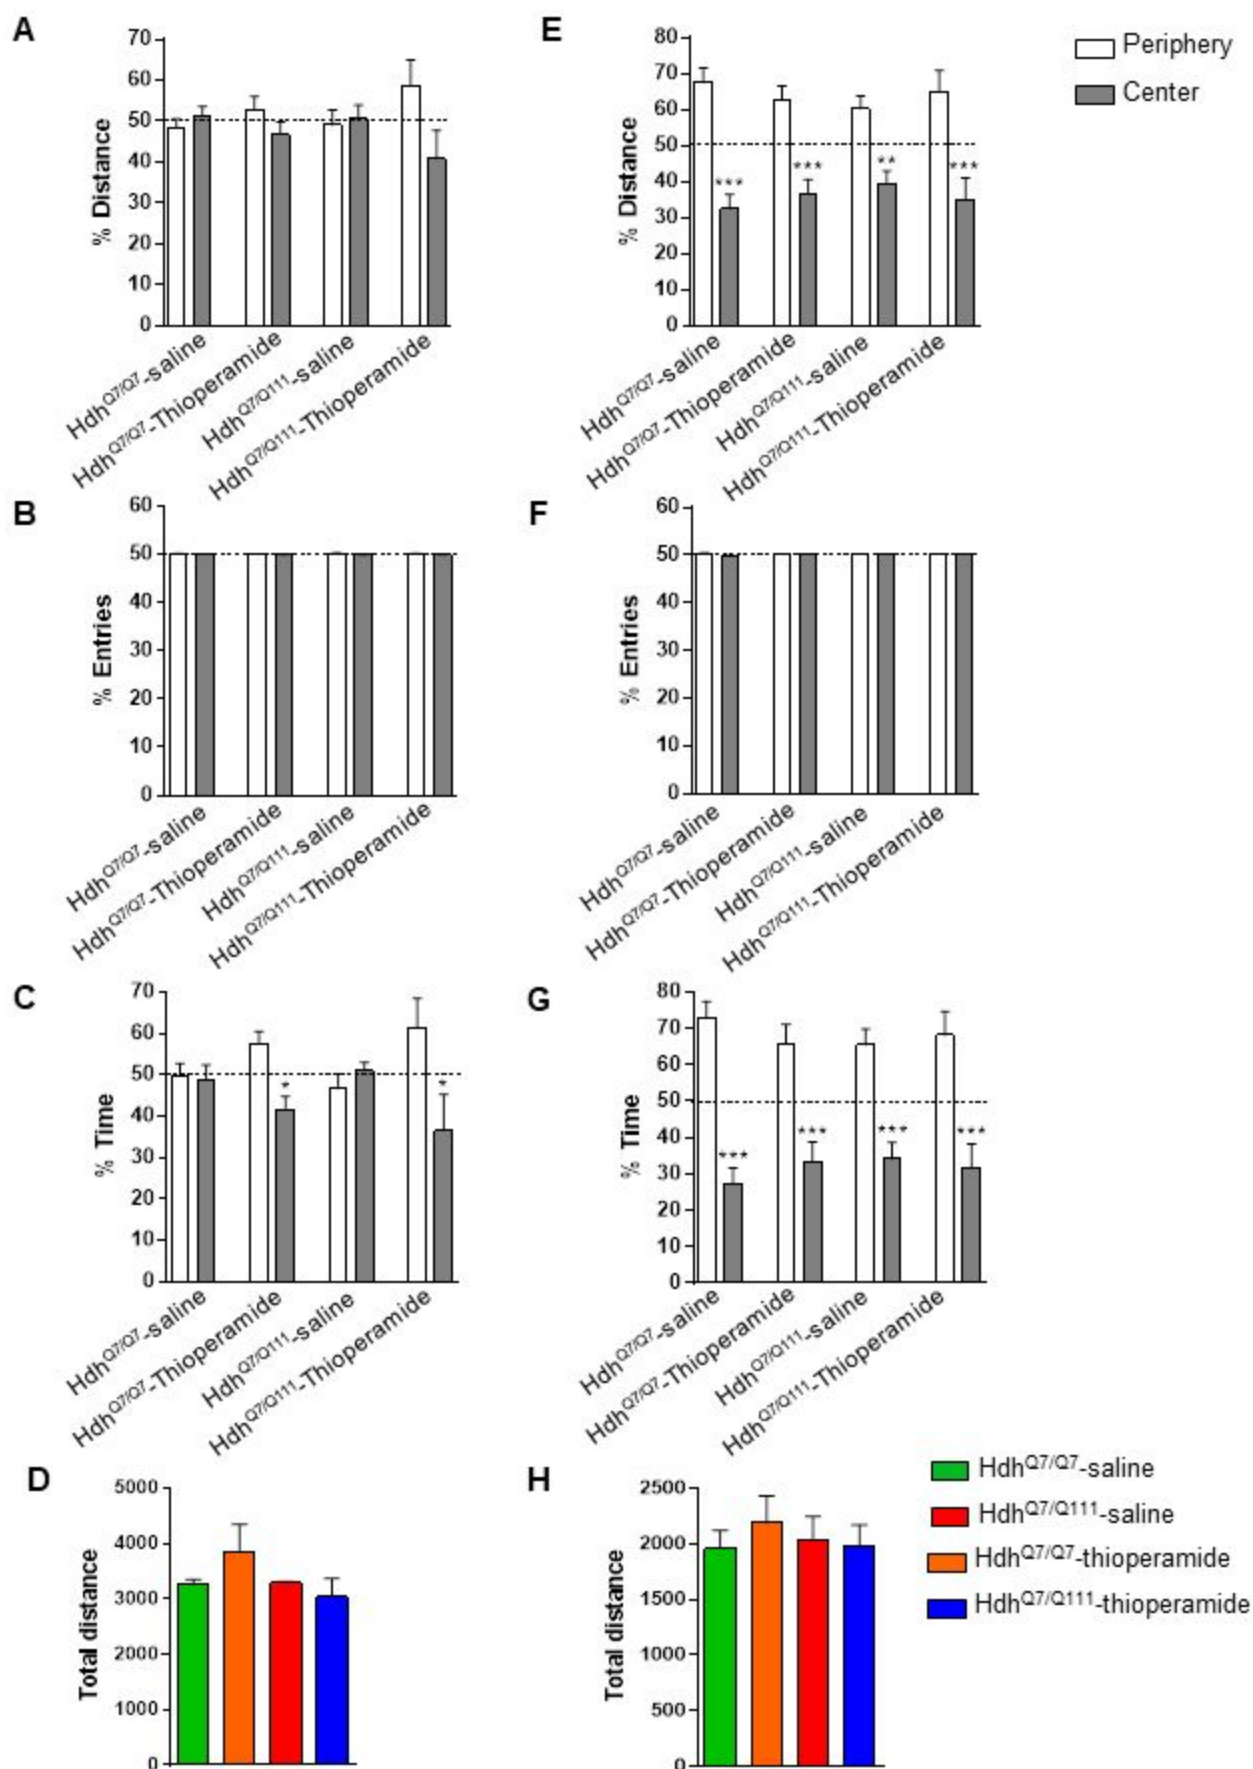

SUPPLEMENTARY FIGURE 11

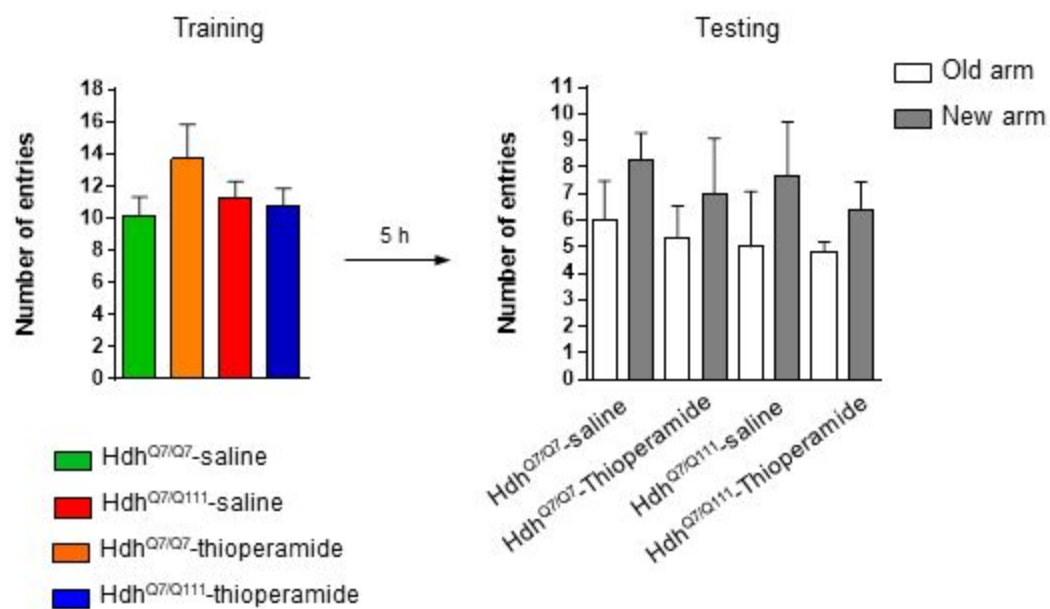

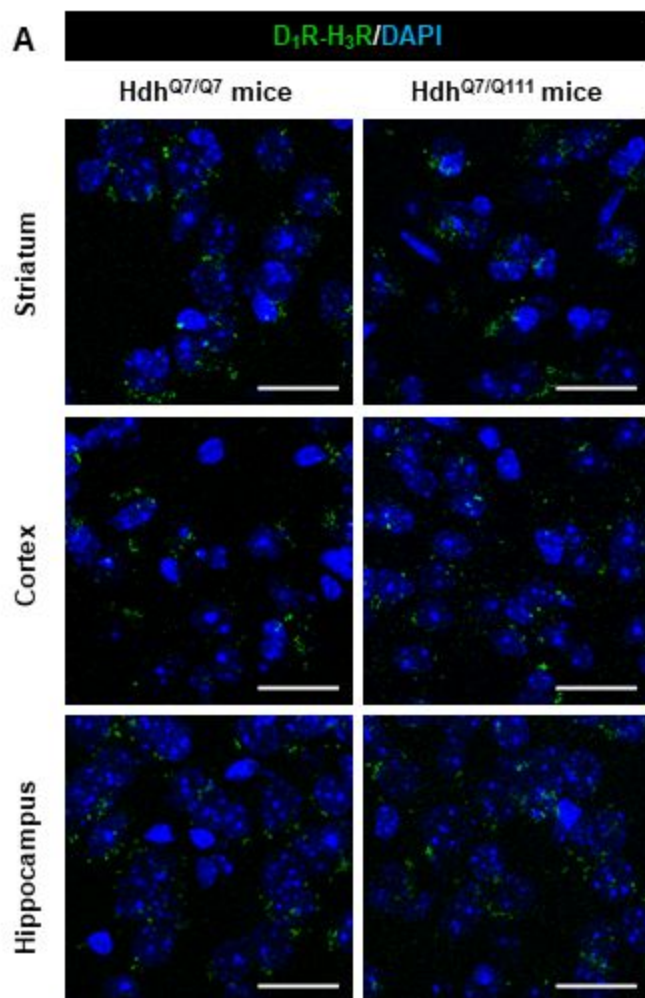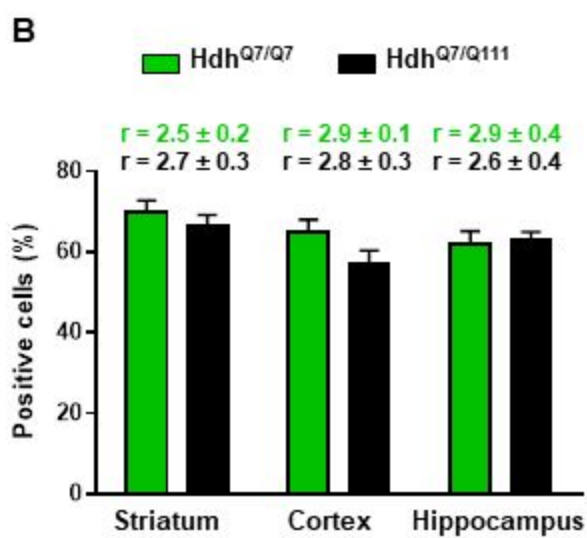

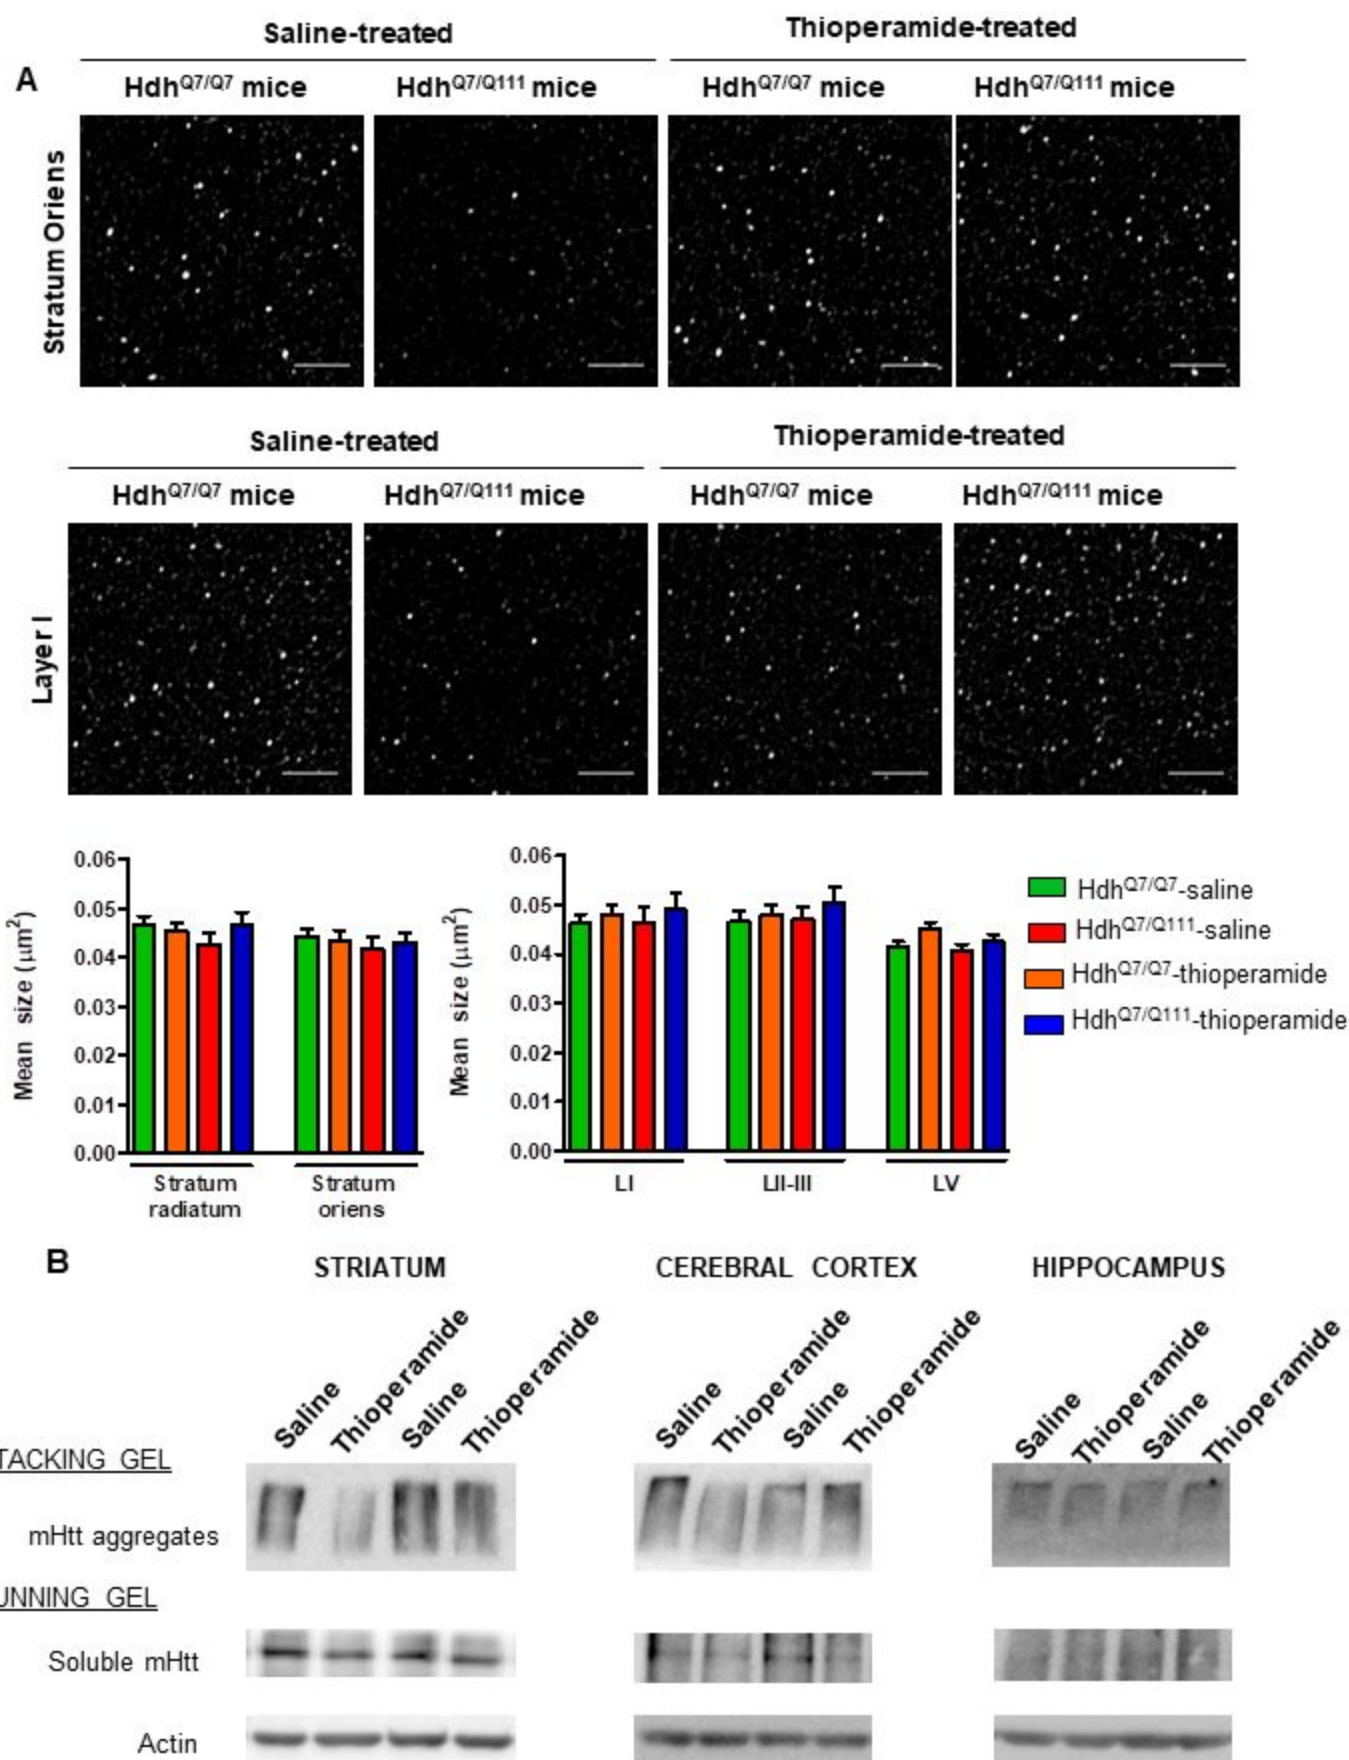

SUPPLEMENTARY FIGURE 14

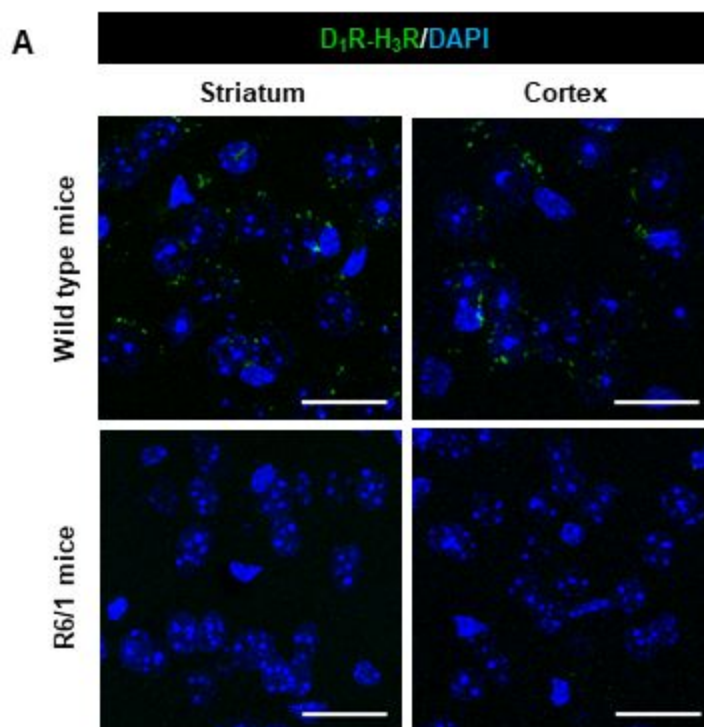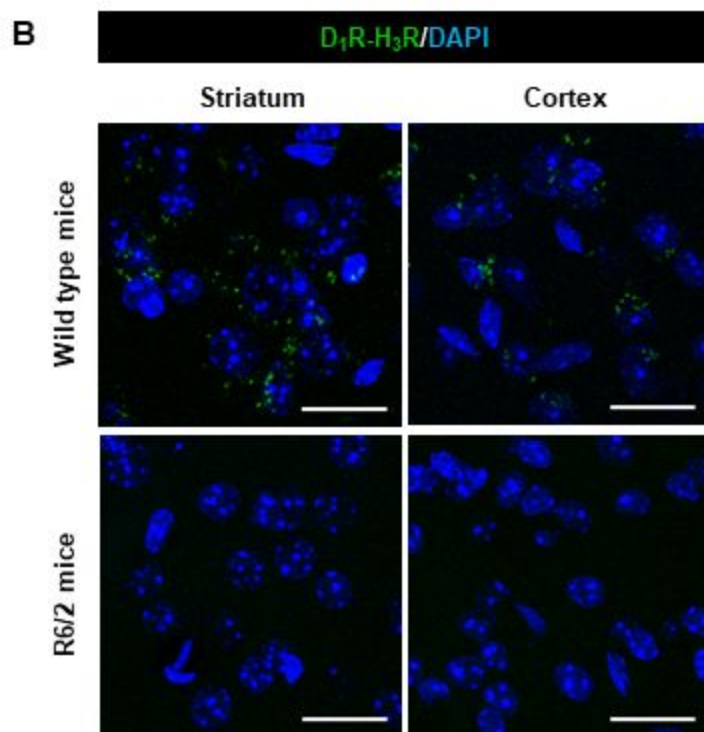

Source: https://biorxiv.org/content/biorxiv/early/2019/11/11/837658.full-text.pdf
